# Supplementary material for: Efficient synthesis of organic thioacetates in water
Source: Royal Society of Chemistry journal article supplement (doi:10.1039/c8ob01896k), 2018-01-01
Supplement: c8ob01896k1.pdf [file c8ob01896k1.pdf]

## Electronic supplementary information

### Efficient Synthesis of Organic Thioacetates in Water

F. Olivito<sup>a,b\*</sup>, P. Costanzo<sup>a</sup>, M. L. Di Gioia<sup>c</sup>, M. Nardi<sup>b,d</sup>, M. Oliverio<sup>a</sup>, A. Procopio<sup>a</sup>

<sup>a</sup>*Dipartimento di Scienze della Salute, Università Magna Græcia, Viale Europa, Germaneto, CZ, Italy.*

*E-mail: fabrizioolivito@gmail.com*

<sup>b</sup>*Dipartimento di Chimica, Università della Calabria, Cubo 12C, Arcavacata di Rende, CS, Italy.*

<sup>c</sup>*Dipartimento di Farmacia e Scienze della Salute e della Nutrizione, Edificio Polifunzionale, Università della Calabria, 87030 Arcavacata di Rende, Cosenza, Italy.*

<sup>d</sup>*Dipartimento di Agraria, Università Telematica San Raffaele, Roma, Via di Val Cannuta, 247, 00166, Italia.*

## Table of Contents

|                                                                                                                                   |     |
|-----------------------------------------------------------------------------------------------------------------------------------|-----|
| 1. Total reaction scheme.....                                                                                                     | S3  |
| 2. General procedure for the synthesis of organic mesylates.....                                                                  | S3  |
| 3. General, Experimental and Analytical Information.....                                                                          | S3  |
| a. GC-MS spectra.....                                                                                                             | S8  |
| b. <sup>1</sup> H and <sup>13</sup> C-NMR spectra.....                                                                            | S12 |
| 4. General reaction scheme for the synthesis of organic thioacetates.....                                                         | S25 |
| 5. General procedure for the synthesis of benzyl thioacetate (1b), allyl thioacetates (2b-5b) and propargyl thioacetate (6b)..... | S25 |
| 6. General procedure for the synthesis of primary thioacetates (1d-6d).....                                                       | S25 |
| 7. General, Experimental and Analytical Information .....                                                                         | S25 |
| a. GC-MS spectra.....                                                                                                             | S29 |
| b. <sup>1</sup> H AND <sup>13</sup> C-NMR.....                                                                                    | S33 |
| 8. Notes and references.....                                                                                                      | S57 |

### 1. Total reaction scheme

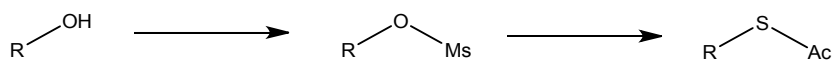

### 2. General procedure for the synthesis of organic mesylates

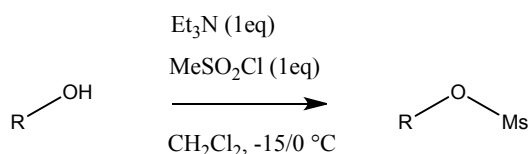

All the mesylates were synthesized starting from alcohol following the same procedures reported in literature.<sup>1,2,3</sup> The reactions were almost quantitative after work up and the freshly prepared product were used directly for the next step. All GC-MS and NMR spectra were comparable to those reported in literature, otherwise the other products were characterized by GC-MS and NMR spectroscopy.

In a one neck round bottom flask, 4.6 mmol of the corresponding alcohol were dissolved in 20 ml of  $\text{CH}_2\text{Cl}_2$  and the mixture cooled down at  $0^\circ\text{C}$ . 4.6 mmol of triethylamine were added under stirring. After that, 4.6 mmol of methane sulfonyl chloride were added dropwise under stirring. The mixture was stirred open flask for one hour and half. The reaction was quenched with 2 ml of HCl 1N and the solution washed with  $\text{NaHCO}_3$  saturated aqueous solution. The organic phase was extracted and washed three times with water. The organic phase was dried over  $\text{Na}_2\text{SO}_4$ . The solvent was removed under reduced pressure using a rotary evaporator to obtain a pink liquid. GC-MS Yield (>90%). A high vacuum pump was used to remove any residual solvent and minor impurities, after that the isolate yield was calculated in the usual way as percentage yield from the ratio between the actual yield and the theoretical yield. The theoretical yield was obtained considering the organic alcohol as the limiting reactant. The actual yield was obtained weighing the product after the mentioned work up.

### 3. General, Experimental and Analytical Information

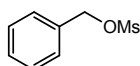

**Benzyl mesylate (1a)**, in accordance to general procedure, was prepared from benzyl alcohol (0.5g, 4.6 mmol), triethylamine (1eq, 4.6mmol) and methane sulfonyl chloride (1 eq, 4.6 mmol), dissolved in 20 mL of  $\text{CH}_2\text{Cl}_2$ , under stirring at  $-15^\circ\text{C}$ . After 1 hour and half the reaction mixture was quenched with 2ml of HCl 1N and the solution washed with  $\text{NaHCO}_3$  saturated aqueous solution. The organic phase was washed three times with water and dried over  $\text{Na}_2\text{SO}_4$ . The solvent was removed under vacuum to afford a pink yellow

liquid in a quantitative yield. GC-MS spectra comparable to those reported in literature. NMR spectra comparable to those reported in literature.<sup>4</sup>

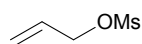

**Allyl mesylate (2a)**, in accordance to general procedure, was prepared from allyl alcohol (0.5g, 8.6 mmol), triethylamine (1eq, 8.6 mmol) and methane sulfonyl chloride (1 eq, 8.6 mmol), dissolved in 20 mL of  $\text{CH}_2\text{Cl}_2$ , under stirring at  $-15^\circ\text{C}$ . After 1 hour and half the reaction mixture was quenched with 2ml of HCl 1N and the solution washed with  $\text{NaHCO}_3$  saturated aqueous solution. The organic phase was washed three times with water and dried over  $\text{Na}_2\text{SO}_4$ . The solvent was removed under vacuum to afford a pink yellow liquid in quantitative yield.  $^1\text{H-NMR}$ : (300 MHz,  $\text{CDCl}_3$ ,  $25^\circ\text{C}$ )  $\delta$  = 3.02 (3H, s,  $\text{CH}_3$ ), 4.72 (2H, d,  $^3J$  = 6Hz,  $\text{CH}_2\text{O}$ ), 5.38 (1H, dd,  $^3J$ =10.3Hz,  $^4J$ = 0.9Hz,  $\text{CH}_2=$ ), 5.46 (1H, dd,  $^3J$ =17.1Hz,  $^4J$ = 1.3Hz,  $\text{CH}_2=$ ), 5.97(1H, ddt,  $^3J$ =17Hz,  $^3J$ =10.4Hz,  $^3J$ =6Hz,  $\text{CH=}$ ).  $^{13}\text{C-NMR}$  : (75 MHz,  $\text{CDCl}_3$ ,  $25^\circ\text{C}$ )  $\delta$  = 38.04 ( $\text{CH}_3\text{-S}$ ), 70.38 ( $\text{CH}_2\text{-O}$ ), 120.79 ( $\text{CH}_2=$ ), 130.48 ( $\text{CH=CH}_2$ ).

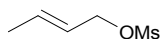

**Trans-2-butenyl mesylate (3a)**, in accordance to general procedure, was prepared from crotyl alcohol (0.5g, 6.9 mmol), triethylamine (1eq, 6.9mmol) and methane sulfonyl chloride (1 eq, 6.9 mmol), dissolved in 20 mL of  $\text{CH}_2\text{Cl}_2$ , under stirring at  $-15^\circ\text{C}$ . After 1 hour and half the reaction mixture was quenched with 2ml of HCl 1N and the solution washed with  $\text{NaHCO}_3$  saturated aqueous solution. The organic phase was washed three times with water and dried over  $\text{Na}_2\text{SO}_4$ . The solvent was removed under vacuum to afford a pink yellow liquid in quantitative yield. GC-MS(ESI):  $m/z$  (%) , 150 ( $\text{M}^+$ , 0.4), 80 (11), 79 (15), 71 (42), 65 (11), 55 (100), 43 (27).  $^1\text{H-NMR}$ : (300 MHz,  $\text{CDCl}_3$ ,  $25^\circ\text{C}$ )  $\delta$  = 1,77 (3H, d,  $^3J$ =6.5Hz,  $\text{CH}_3\text{CH}$ ), 3.00 (3H, s,  $\text{CH}_3\text{S}$ ), 4.67 (2H, d,  $^3J$ =6.9Hz,  $\text{CH}_2\text{O}$ ), 5.58-5.68 (1H, m,  $\text{CH=}$ ), 5.87-5.97(1H, m,  $\text{CH=}$ ).  $^{13}\text{C-NMR}$  :  $\delta$  = 17.73 ( $\text{CH}_3\text{-CH}$ ), 38.21 ( $\text{CH}_3\text{S}$ ), 70.78 ( $\text{CH}_2\text{S}$ ), 123.49 ( $\text{CHCH}_2$ ), 134.57( $\text{CHCH}_3$ ). NMR data comparable to those reported in literature.<sup>5</sup>

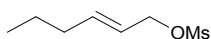

**Trans-2-hexenyl mesylate (4a)**, in accordance to general procedure, was prepared from trans-hexenyl alcohol (0.5g, 4.9 mmol), triethylamine (1eq, 6.9 mmol) and methane sulfonyl chloride (1 eq, 6.9 mmol), dissolved in 20 mL of  $\text{CH}_2\text{Cl}_2$ , under stirring at  $-15^\circ\text{C}$ . After 1 hour and half the reaction mixture was quenched with 2ml of HCl 1N and the solution washed with  $\text{NaHCO}_3$  saturated aqueous solution. The organic phase was washed three times with water and dried over  $\text{Na}_2\text{SO}_4$ . The solvent was removed under vacuum to afford a pink yellow liquid in quantitative yield. GC-MS(ESI):  $m/z$  (%) , 149 (0.4), 82 (59), 79 (27), 67 (100), 57 (31), 55 (43), 41 (55).  $^1\text{H-NMR}$ : (300 MHz,  $\text{CDCl}_3$ ,  $25^\circ\text{C}$ ):  $\delta$  = 0.90 (3H, t,  $^3J$ =7.3Hz,  $\text{CH}_3\text{CH}_2$ ), 1.42 (2H, sextuplet,  $^3J$ =7.4Hz,  $\text{CH}_2\text{CH}_3$ ), 2.06 (2H, q,  $^3J$ =7.2Hz,  $\text{CH}_2\text{CH}$ ), 2.99 (3H, s,  $\text{CH}_3\text{S}$ ), 4.67 (2H, d,  $^3J$ =6.8Hz,  $\text{CH}_2\text{S}$ ), 5.58-5.63(1H, m,  $\text{CH=}$ ), 5.88-5.93(1H, m,  $\text{CH=}$ ).  $^{13}\text{C-NMR}$  : (75 MHz,  $\text{CDCl}_3$ ,  $25^\circ\text{C}$ )  $\delta$  = 13.58 ( $\text{CH}_3\text{-CH}_2$ ), 21.82 ( $\text{CH}_2\text{CH}_3$ ), 34.21, 38.24, 70.93 ( $\text{CH}_2\text{S}$ ), 122.27( $\text{CHCH}_2\text{S}$ ), 139.58( $\text{CHCH}_2\text{CH}_2$ ).

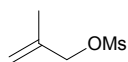

**2-methylallyl mesylate (5a)**, in accordance to general procedure, was prepared from 2-methylallyl alcohol (0.5g, 6.9 mmol), triethylamine (1eq, 6.9mmol) and methane sulfonyl chloride (1 eq, 6.9 mmol), dissolved in 20 mL of CH<sub>2</sub>Cl<sub>2</sub>, under stirring at -15 °C. After 1 hour and half the reaction mixture was quenched with 2ml of HCl 1N and the solution washed with NaHCO<sub>3</sub> saturated aqueous solution. The organic phase was washed three times with water and dried over Na<sub>2</sub>SO<sub>4</sub>. The solvent was removed under vacuum to afford a pink yellow liquid in quantitative yield. GC-MS(ESI): m/z (%) , 150 (M<sup>+</sup>, 10), 80 (31), 72 (21), 71 (100), 65 (23), 55 (69), 43 (54). <sup>1</sup>H-NMR: (300 MHz, CDCl<sub>3</sub>, 25°C): δ = 1.81 (3H, s, CH<sub>3</sub>C), 3.01 (3H, s, CH<sub>3</sub>S), 4.61 (2H, s, CH<sub>2</sub>), 5.09 (2H, d, <sup>2</sup>J=19.1Hz, CH<sub>2</sub>=). <sup>13</sup>C-NMR : (75 MHz, CDCl<sub>3</sub>, 25°C) δ = 19.09 (CH<sub>3</sub>-C), 37.87 (CH<sub>3</sub>-S), 73.37 (CH<sub>2</sub>O), 116.08 (CH<sub>2</sub>=), 138.17 (C=).

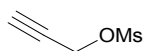

**Prop-2-yn-1-yl mesylate (6b)**, in accordance to general procedure, was prepared from propargyl alcohol (0.5g, 8.9 mmol), triethylamine (1eq, 6.9mmol) and methane sulfonyl chloride (1 eq, 6.9 mmol), dissolved in 20 mL of CH<sub>2</sub>Cl<sub>2</sub>, under stirring at -15 °C. After 1 hour and half the reaction mixture was quenched with 2ml of HCl 1N and the solution washed with NaHCO<sub>3</sub> saturated aqueous solution. The organic phase was washed three times with water and dried over Na<sub>2</sub>SO<sub>4</sub>. The solvent was removed under vacuum to afford a pink yellow liquid in quantitative yield. GC-MS spectra comparable to those reported in literature.<sup>6</sup> NMR spectra comparable to those reported in literature.<sup>7</sup>

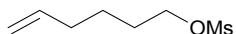

**5-hexenyl mesylate (1c)**, in accordance to general procedure, was prepared from 5-hexen-1-ol (0.5g, 4.9 mmol), triethylamine (1eq, 4.9mmol) and methane sulfonyl chloride (1 eq, 4.9 mmol), dissolved in 20 mL of CH<sub>2</sub>Cl<sub>2</sub>, under stirring at -15 °C. After 1 hour and half the reaction mixture was quenched with 2ml of HCl 1N and the solution washed with NaHCO<sub>3</sub> saturated aqueous solution. The organic phase was washed three times with water and dried over Na<sub>2</sub>SO<sub>4</sub>. The solvent was removed under vacuum to afford a pink yellow liquid in quantitative yield. GC-MS(ESI): m/z (%) , 150 (0.4), 82 (31), 79 (29), 67 (100), 54 (96), 53 (4), 42 (4), 41 (38). NMR comparable to those reported in literature.<sup>8</sup>

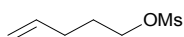

**4-pentenyl mesylate (2c)** , in accordance to general procedure, was prepared from 4-penten-1-ol (0.5g, 5.8 mmol) , triethylamine (1eq, 5.8mmol) and methane sulfonyl chloride (1 eq, 5.8 mmol), dissolved in 20 mL of CH<sub>2</sub>Cl<sub>2</sub> , under stirring at -15 °C. After 1 hour and half the reaction mixture was quenched with 2ml of HCl 1N and the solution washed with NaHCO<sub>3</sub> saturated aqueous solution. The organic phase was washed three times with water and dried over Na<sub>2</sub>SO<sub>4</sub>. The solvent was removed under vacuum to afford a pink yellow liquid in quantitative yield. GC-MS(ESI): m/z (%) , 135 (0.4), 109 (0.8), 79 (31), 67 (100), 55 (13), 53 (19), 42 (8), 41 (23) . NMR comparable to those reported in literature.<sup>9</sup>

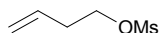

**4-methanesulfonyloxy-1-butene (3c)** , in accordance to general procedure, was prepared from homoallylic alcohol (0.5g, 5.8 mmol) , triethylamine (1eq, 5.8mmol) and methane sulfonyl chloride (1 eq, 5.8 mmol), dissolved in 20 mL of CH<sub>2</sub>Cl<sub>2</sub> , under stirring at -15 °C. After 1 hour and half the reaction mixture was quenched with 2ml of HCl 1N and the solution washed with NaHCO<sub>3</sub> saturated aqueous solution. The organic phase was washed three times with water and dried over Na<sub>2</sub>SO<sub>4</sub>. The solvent was removed under vacuum to afford a pink yellow liquid in quantitative yield. GC-MS(ESI): m/z (%) , 149 (M-1, 0.4), 109 (52), 79 (95), 54 (100), 45 (9), 41 (52) . NMR comparable to those reported in literature.<sup>10</sup>

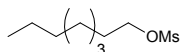

**n-octyl mesylate (4c)** , in accordance to general procedure, was prepared from n-octyl alcohol (0.5g, 5.8 mmol) , triethylamine (1eq, 5.8mmol) and methane sulfonyl chloride (1 eq, 5.8 mmol), dissolved in 20 mL of CH<sub>2</sub>Cl<sub>2</sub> , under stirring at -15 °C. After 1 hour and half the reaction mixture was quenched with 2ml of HCl 1N and the solution washed with NaHCO<sub>3</sub> saturated aqueous solution. The organic phase was washed three times with water and dried over Na<sub>2</sub>SO<sub>4</sub>. The solvent was removed under vacuum to afford a pink yellow liquid in quantitative yield. GC-MS spectra comparable to those reported in literature.<sup>102</sup> NMR comparable to those reported in literature.<sup>11</sup>

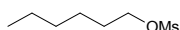

**n-hexyl mesylate (5c)** , in accordance to general procedure, was prepared from n-hexyl alcohol (0.5g, 4.9 mmol) , triethylamine (1eq, 4.9mmol) and methane sulfonyl chloride (1 eq, 4.9 mmol), dissolved in 20 mL of CH<sub>2</sub>Cl<sub>2</sub> , under stirring at -15 °C. After 1 hour and half the reaction mixture was quenched with 2ml of HCl 1N and the solution washed with NaHCO<sub>3</sub> saturated aqueous solution. The organic phase was washed three times with water and dried over Na<sub>2</sub>SO<sub>4</sub>. The solvent was removed under vacuum to afford a pink yellow liquid in quantitative yield. GC-MS spectra comparable to those reported in literature.<sup>102</sup> NMR comparable to those reported in literature.<sup>12</sup>

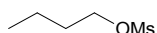

**n-butyl mesylate (6c)** , in accordance to general procedure, was prepared from n-butanol (0.5g, 6.7 mmol) , triethylamine (1eq, 6.7 mmol) and methane sulfonyl chloride (1 eq, 6.7 mmol), dissolved in 20 mL of CH<sub>2</sub>Cl<sub>2</sub> , under stirring at -15 °C. After 1 hour and half the reaction mixture was quenched with 2ml of HCl 1N and the

solution washed with NaHCO<sub>3</sub> saturated aqueous solution. The organic phase was washed three times with water and dried over Na<sub>2</sub>SO<sub>4</sub>. The solvent was removed under vacuum to afford a pink yellow liquid in quantitative yield. GC-MS spectra comparable to those reported in literature.<sup>6</sup> NMR comparable to those reported in literature.<sup>13</sup>

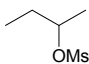

**Sec-butyl mesylate (1e)**, in accordance to general procedure, was prepared from iso-butanol (0.5g, 3.7 mmol), triethylamine (1eq, 3.7mmol) and methane sulfonyl chloride (1 eq, 3.7 mmol), dissolved in 20 mL of CH<sub>2</sub>Cl<sub>2</sub>, under stirring at -15 °C. After 1 hour and half the reaction mixture was quenched with 2ml of HCl 1N and the solution washed with NaHCO<sub>3</sub> saturated aqueous solution. The organic phase was washed three times with water and dried over Na<sub>2</sub>SO<sub>4</sub>. The solvent was removed under vacuum to afford a pink yellow liquid in quantitative yield. GC-MS spectra comparable to those reported in literature.<sup>6</sup> NMR spectra comparable to those reported in literature.<sup>14</sup>

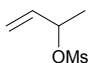

**But-3-en-2-yl mesylate (2e)**, in accordance to general procedure, was prepared from 2-hydroxy-3-butene (0.5g, 3.0 mmol), triethylamine (1eq, 6.9mmol) and methane sulfonyl chloride (1 eq, 6.9 mmol), dissolved in 20 mL of CH<sub>2</sub>Cl<sub>2</sub>, under stirring at -15 °C. After 1 hour and half the reaction mixture was quenched with 2ml of HCl 1N and the solution washed with NaHCO<sub>3</sub> saturated aqueous solution. The organic phase was washed three times with water and dried over Na<sub>2</sub>SO<sub>4</sub>. The solvent was removed under vacuum to afford a pink yellow liquid in quantitative yield. GC-MS(ESI): m/z (%), 149 (M-1, 0.4), 135 (4), 79 (19), 72 (4), 71 (31), 57 (15), 55 (100), 51 (8), 43 (35). <sup>1</sup>H-NMR: (300 MHz, CDCl<sub>3</sub>, 25°C): δ = 1.49 (3H, d, <sup>3</sup>J=6.4Hz, CH<sub>3</sub>CH), 2.99 (3H, s, CH<sub>3</sub>S), 5.14-5.23 (1H, m, CHCH<sub>3</sub>), 5.14-5.43 (2H, m, CH<sub>2</sub>=), 5.85-5.97(1H, m, CH=). <sup>13</sup>C-NMR : (75 MHz, CDCl<sub>3</sub>, 25°C) δ = 21.35 (CH<sub>3</sub>-CH), 38.99 (CH<sub>3</sub>-S), 79.99 (CH-O), 118.35 (CH<sub>2</sub>=), 136.34 (CH=).

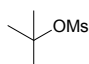

**Tert-butyl mesylate (3e)**, in accordance to general procedure, was prepared from tert-butyl alcohol (0.5g, 6.7 mmol), triethylamine (1eq, 6.7mmol) and methane sulfonyl chloride (1 eq, 6.97 mmol), dissolved in 20 mL of CH<sub>2</sub>Cl<sub>2</sub>, under stirring at -15 °C. After 1 hour and half the reaction mixture was quenched with 2ml of HCl 1N and the solution washed with NaHCO<sub>3</sub> saturated aqueous solution. The organic phase was washed three times with water and dried over Na<sub>2</sub>SO<sub>4</sub>. The solvent was removed under vacuum to afford a pink yellow liquid in quantitative yield. NMR comparable to those reported in literature.<sup>15</sup>

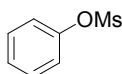

**Phenyl mesylate (4e)**, in accordance to general procedure, was prepared from phenol (0.5g, 5.3 mmol), triethylamine (1eq, 5.3mmol) and methane sulfonyl chloride (1 eq, 5.3 mmol), dissolved in 20 mL of CH<sub>2</sub>Cl<sub>2</sub>, under stirring at -15 °C. After 1 hour and half the reaction mixture was quenched with 2ml of HCl 1N and the

solution washed with NaHCO<sub>3</sub> saturated aqueous solution. The organic phase was washed three times with water and dried over Na<sub>2</sub>SO<sub>4</sub>. The solvent was removed under vacuum to afford a pink yellow liquid in quantitative yield. GC-MS spectra comparable to those reported in literature.<sup>16</sup> NMR comparable to those reported in literature.<sup>17</sup>

a. GC-MS SPECTRA

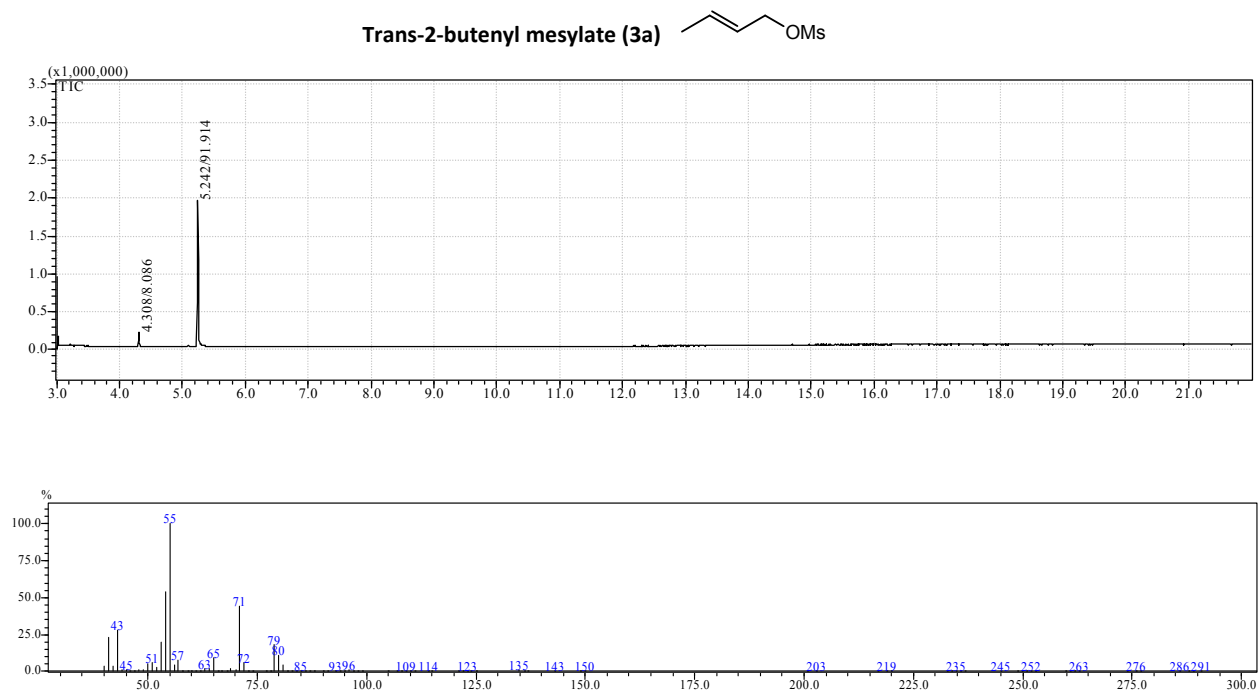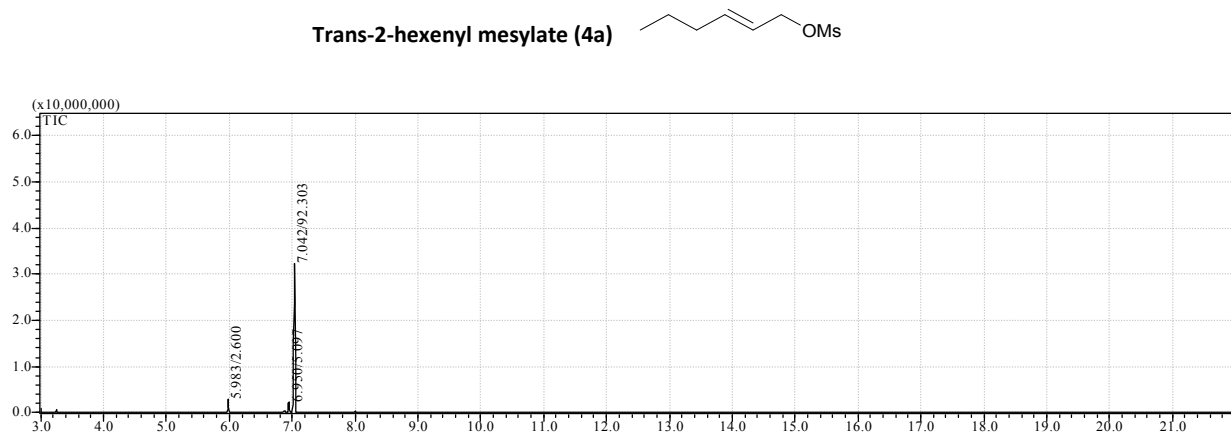



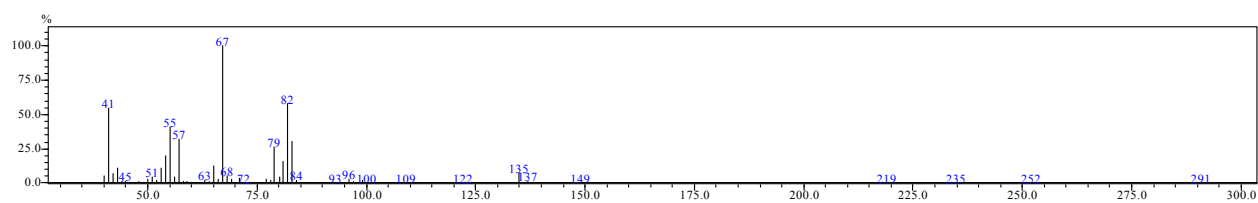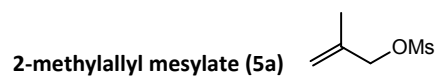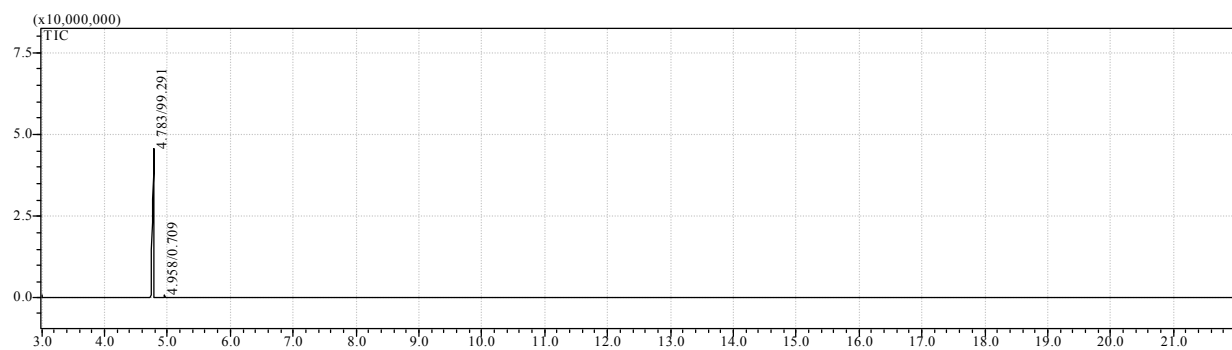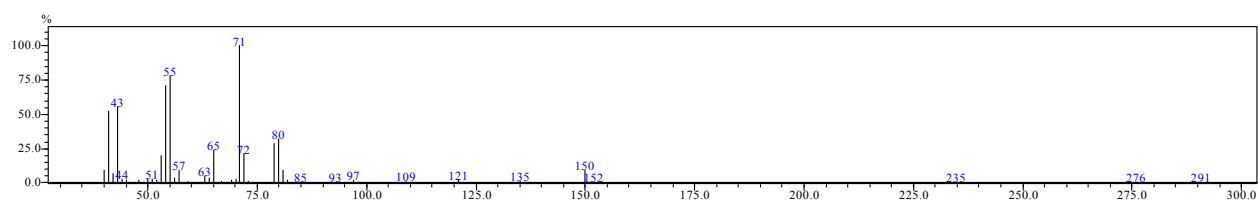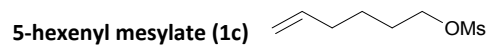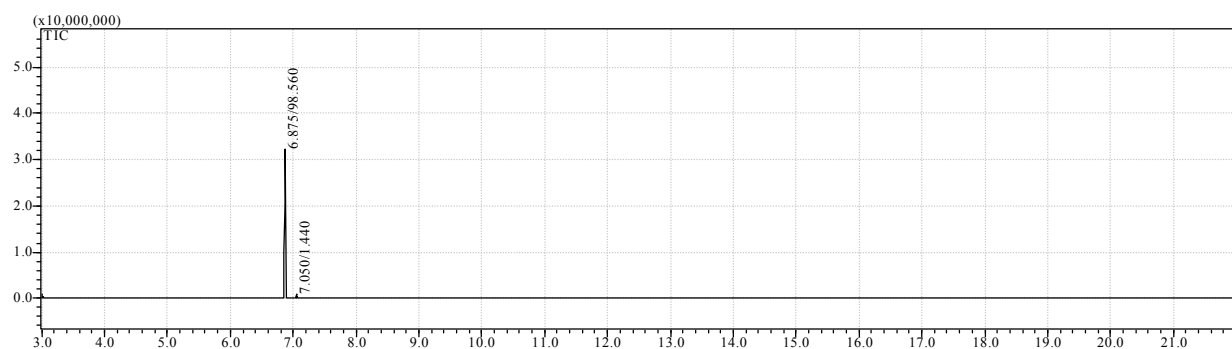

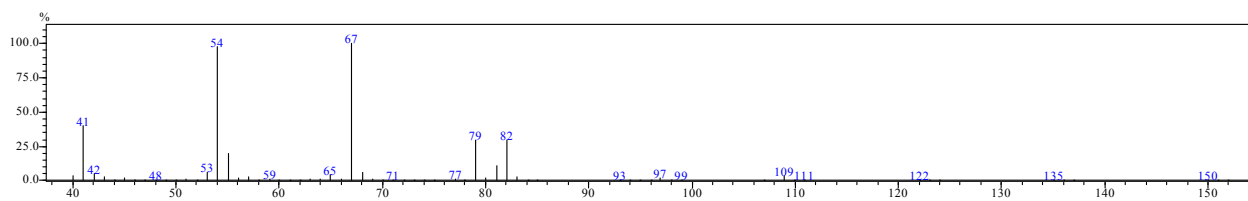

4-pentenyl mesylate (2c) C=CCCCOS(=O)(=O)C

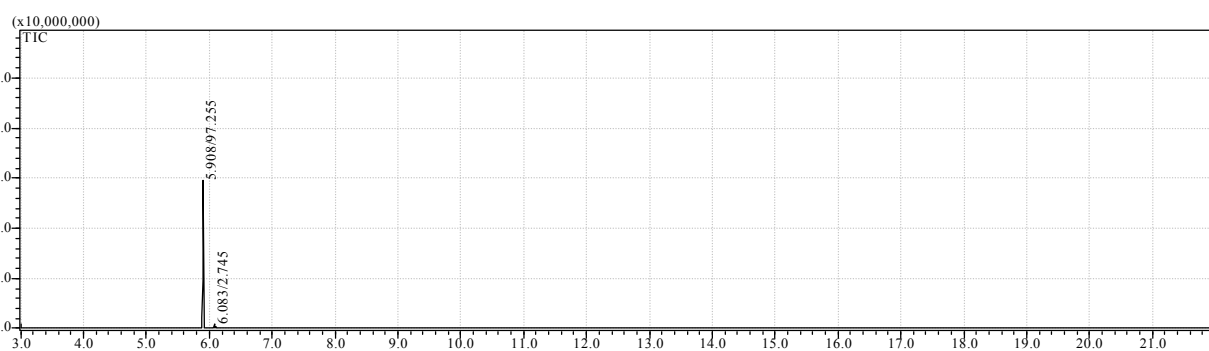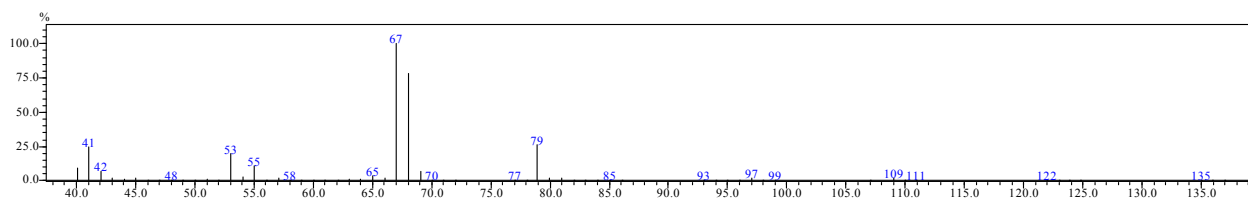

4-methanesulfonyloxy-1-butene (3c) C=CCOS(=O)(=O)C

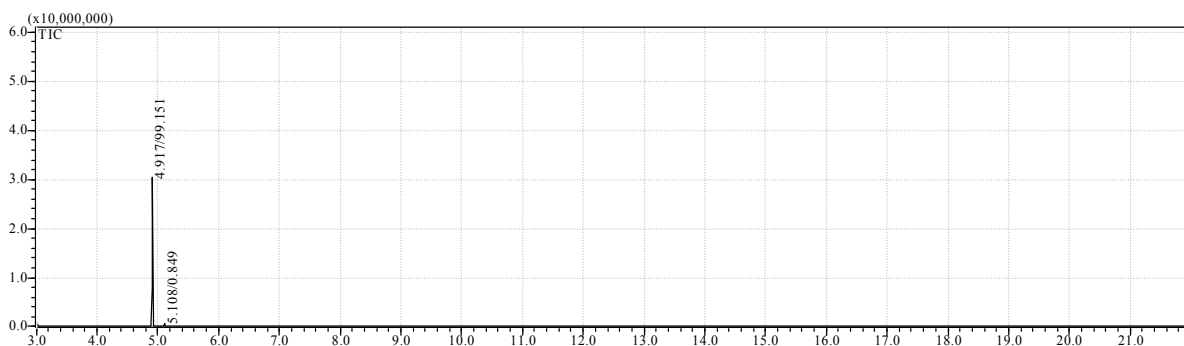

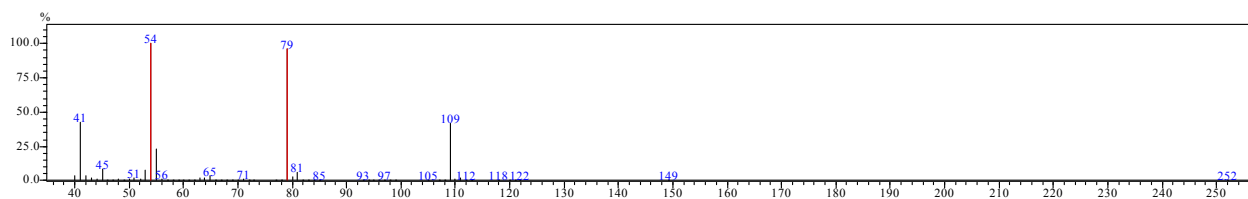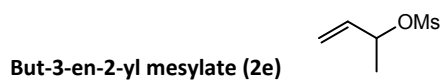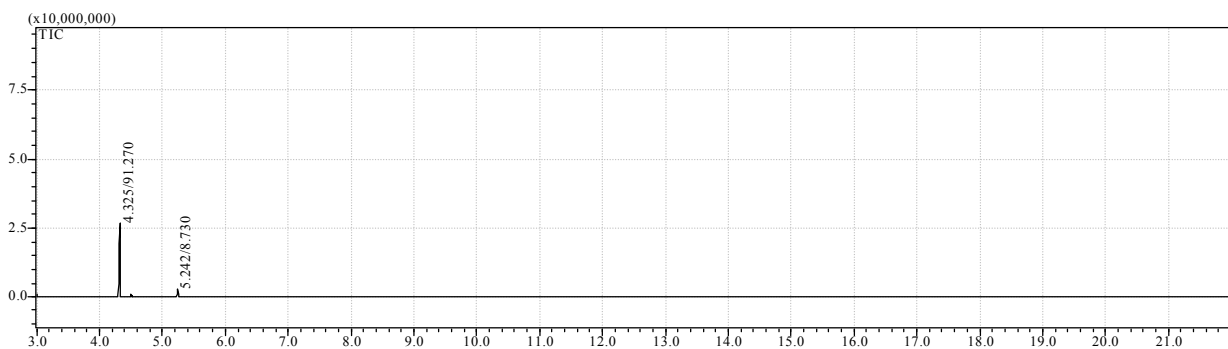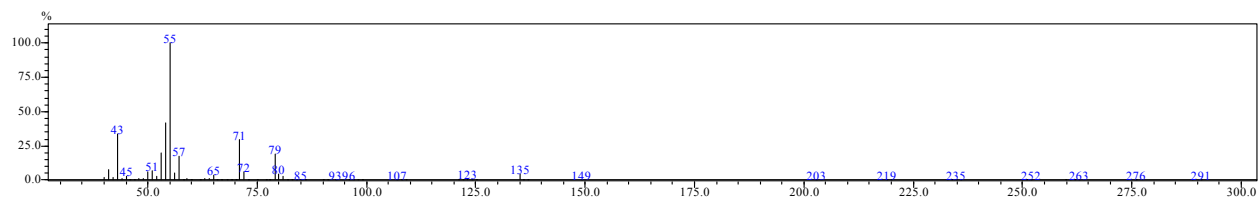

**b. NMR SPECTRA**

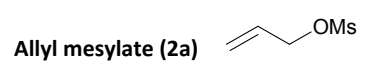

**<sup>1</sup>H-NMR**

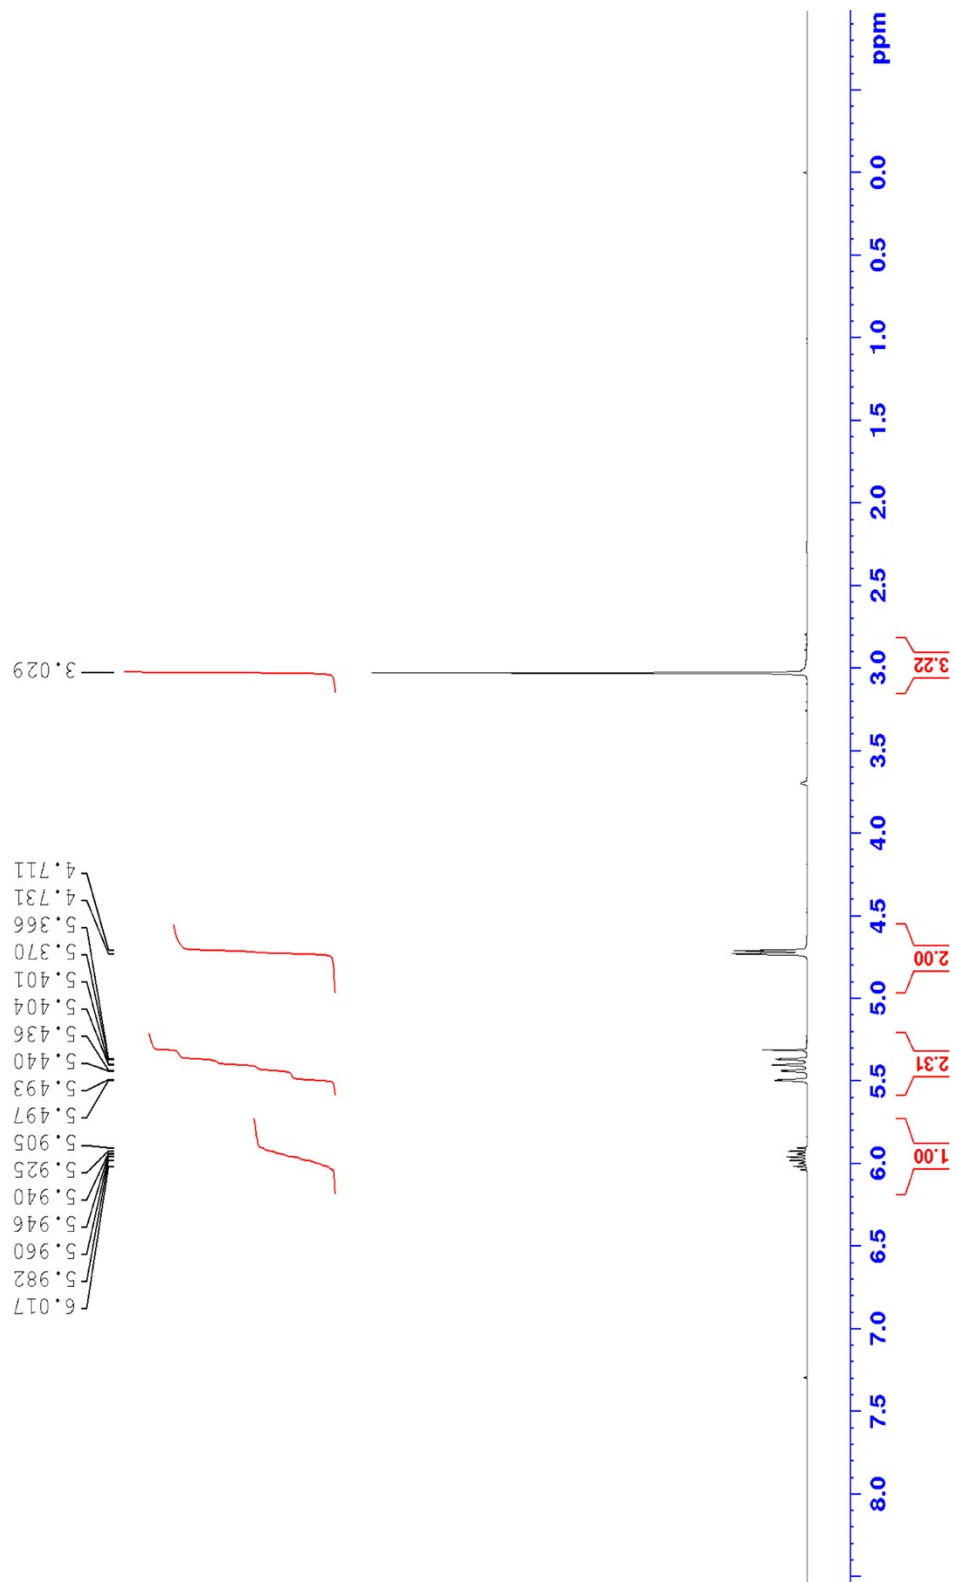

Doublet

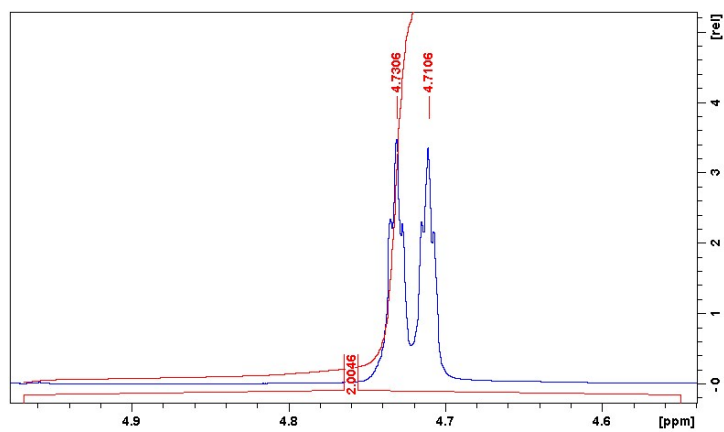

Doublet of doublets

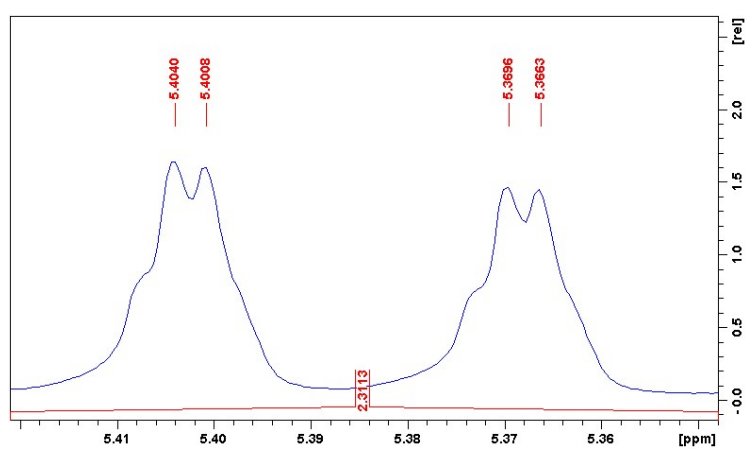

Doublet of doublets

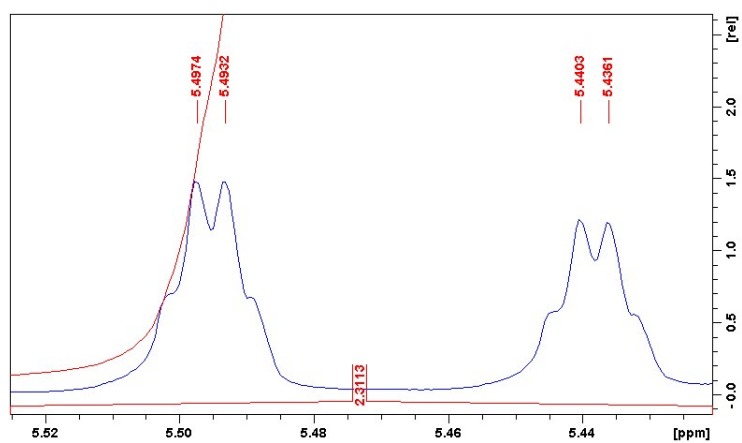

Doublet doublet of triplets

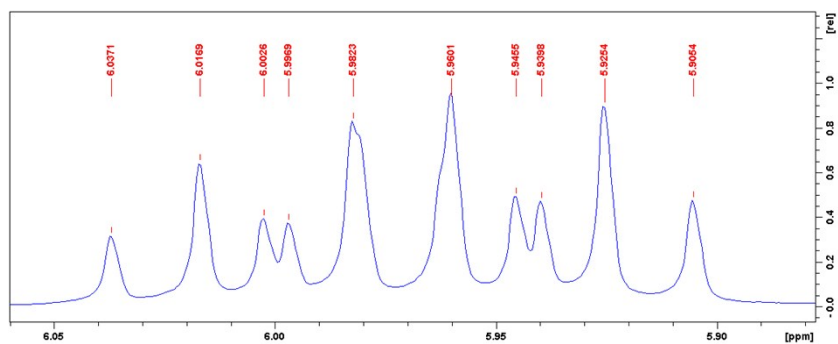

<sup>13</sup>C-NMR

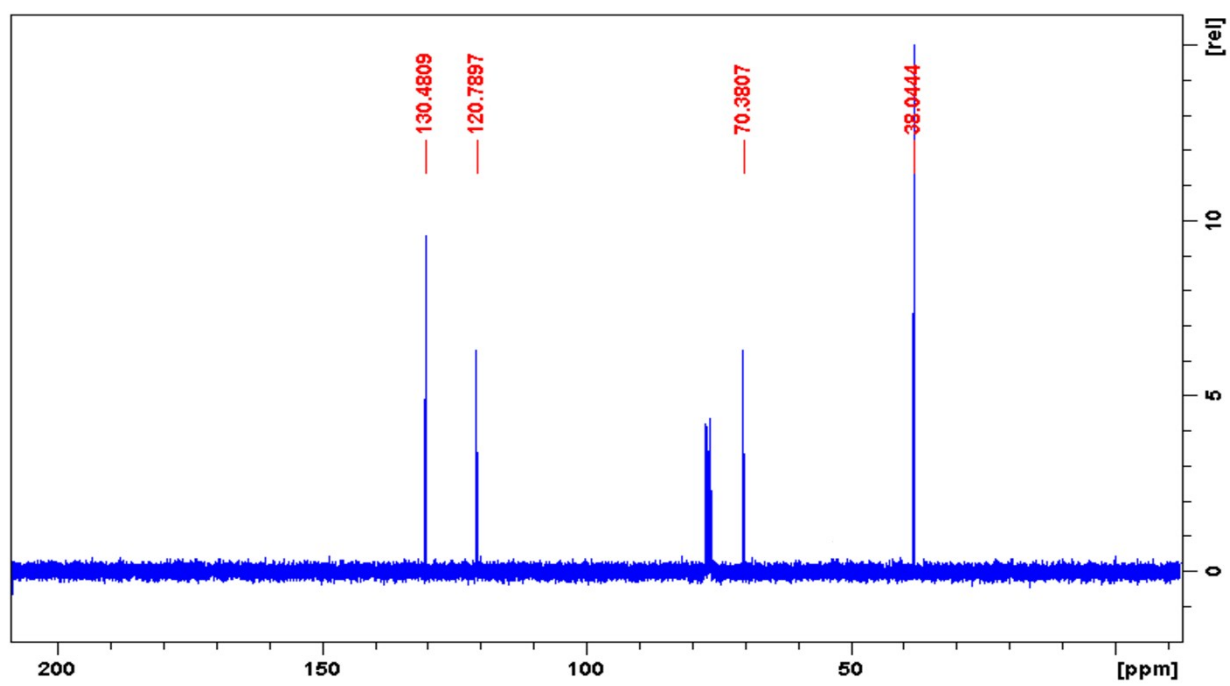

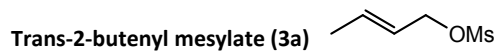

<sup>1</sup>H-NMR

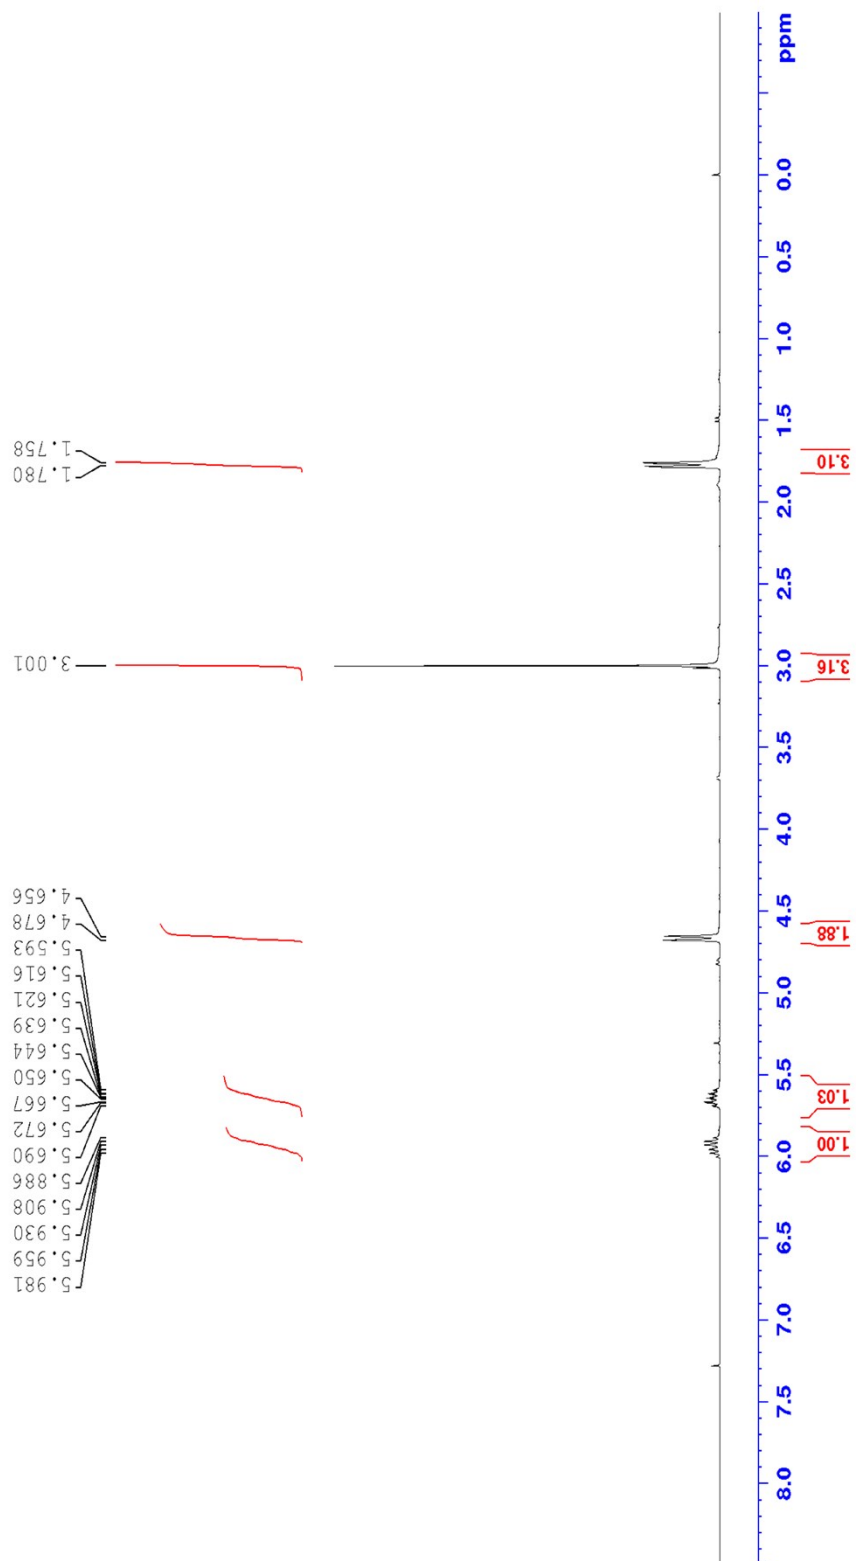



Doublet

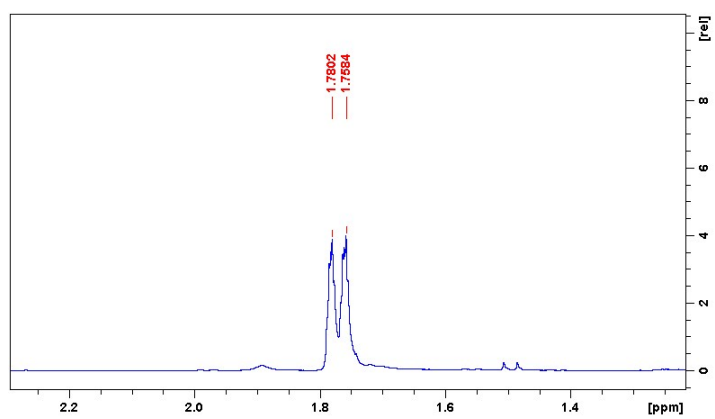

Doublet

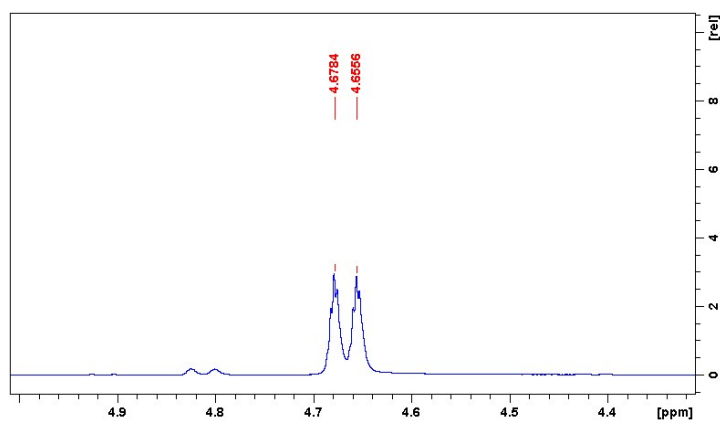

<sup>13</sup>C-NMR

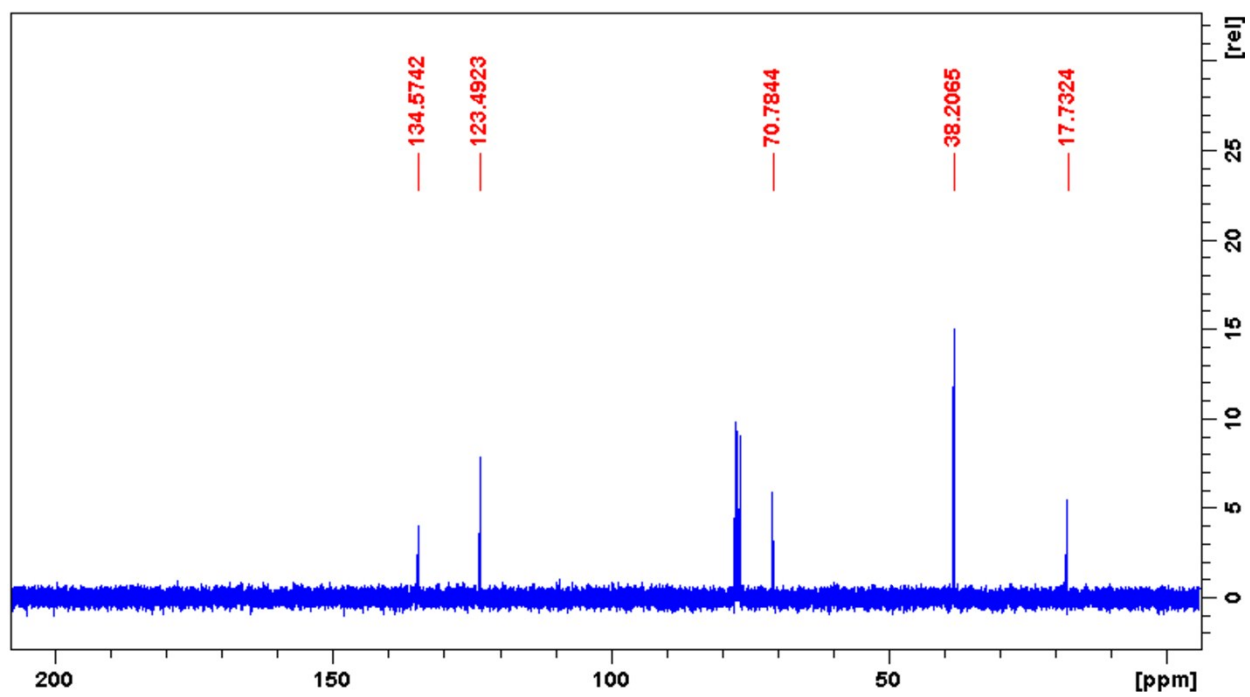

Trans-2-hexenyl mesylate (4a)

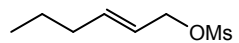

<sup>1</sup>H-NMR

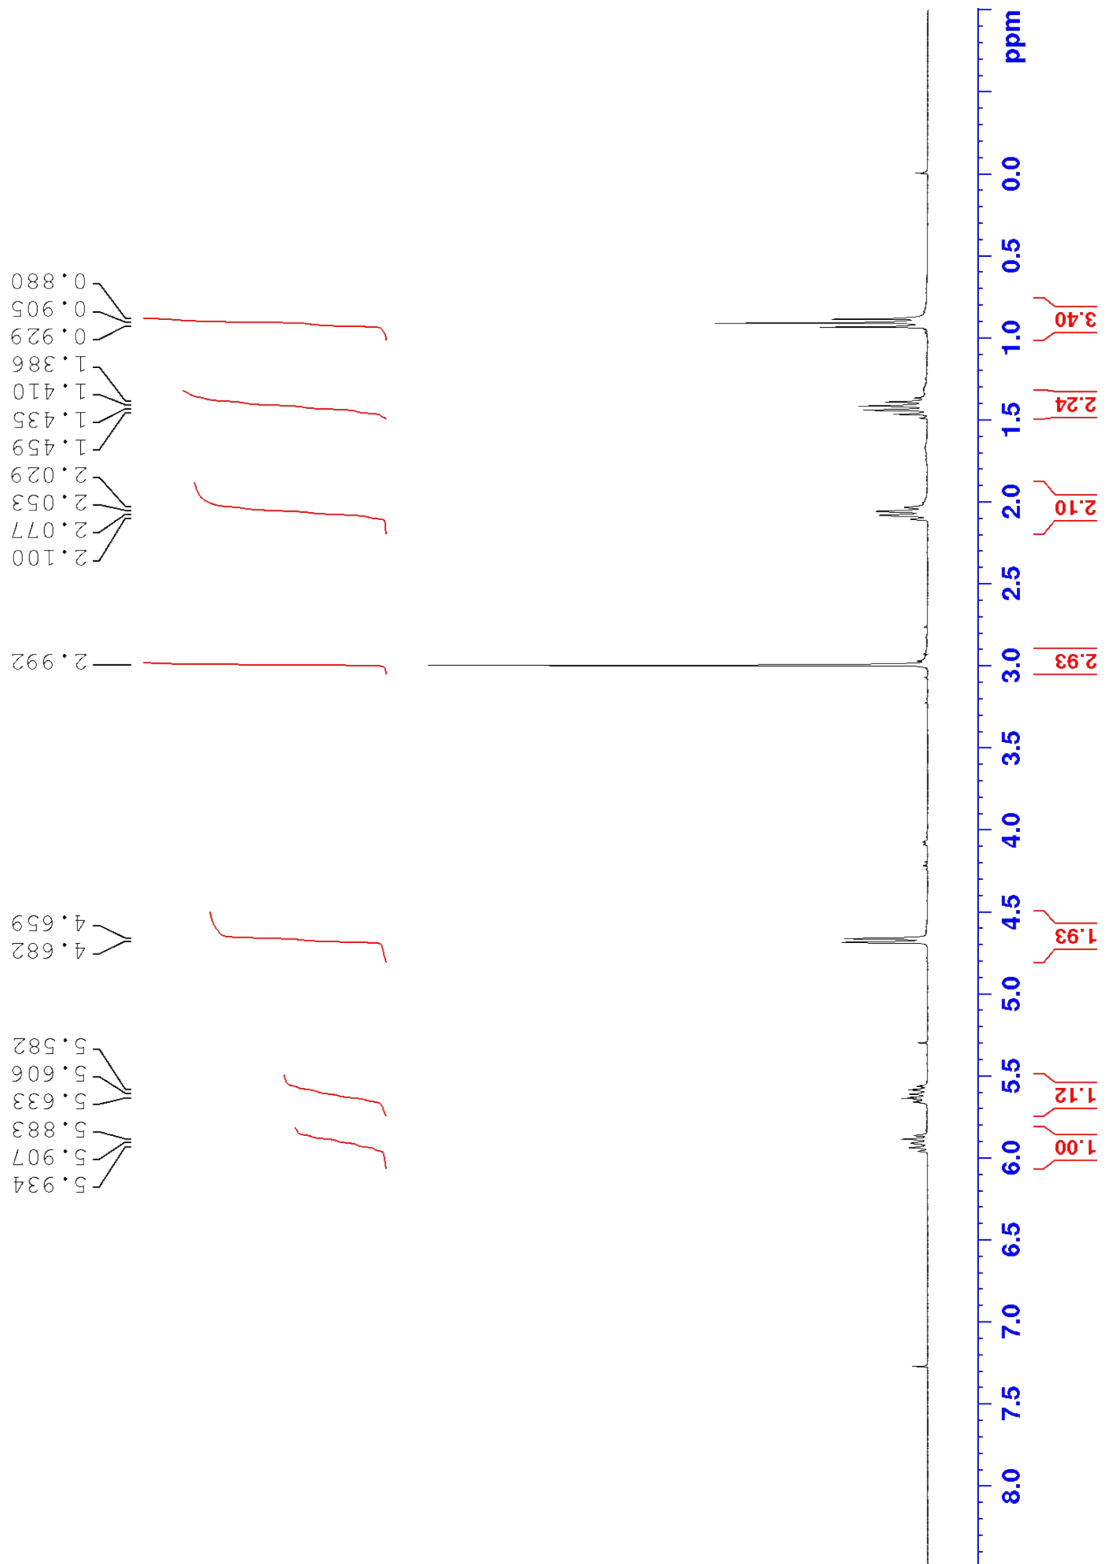

Triplet

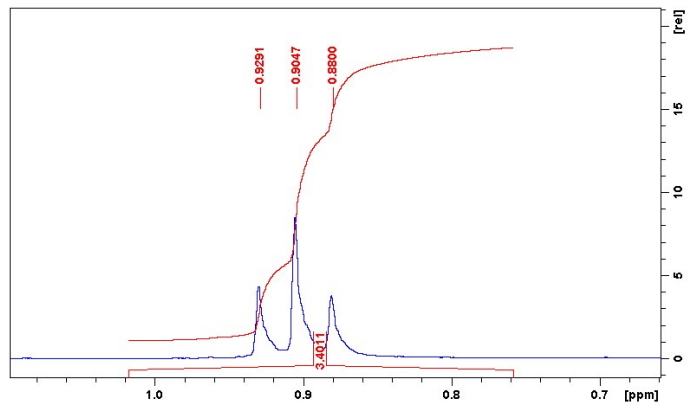

Sextet

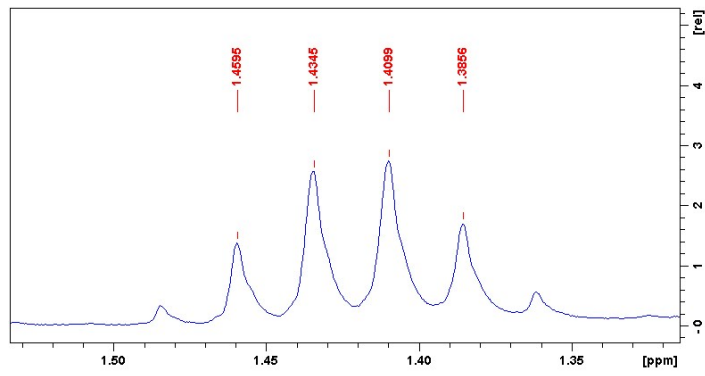

Doublet of triplets

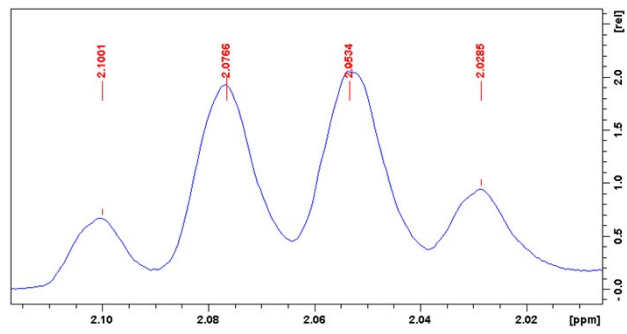

Doublet

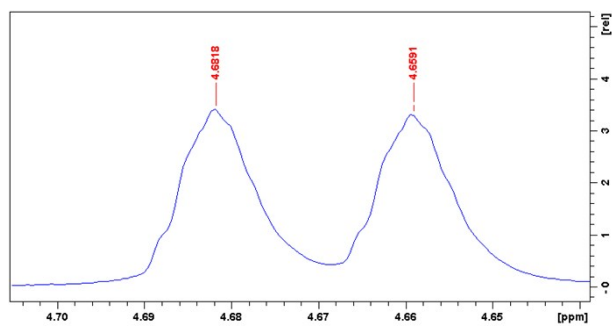

<sup>13</sup>C-NMR

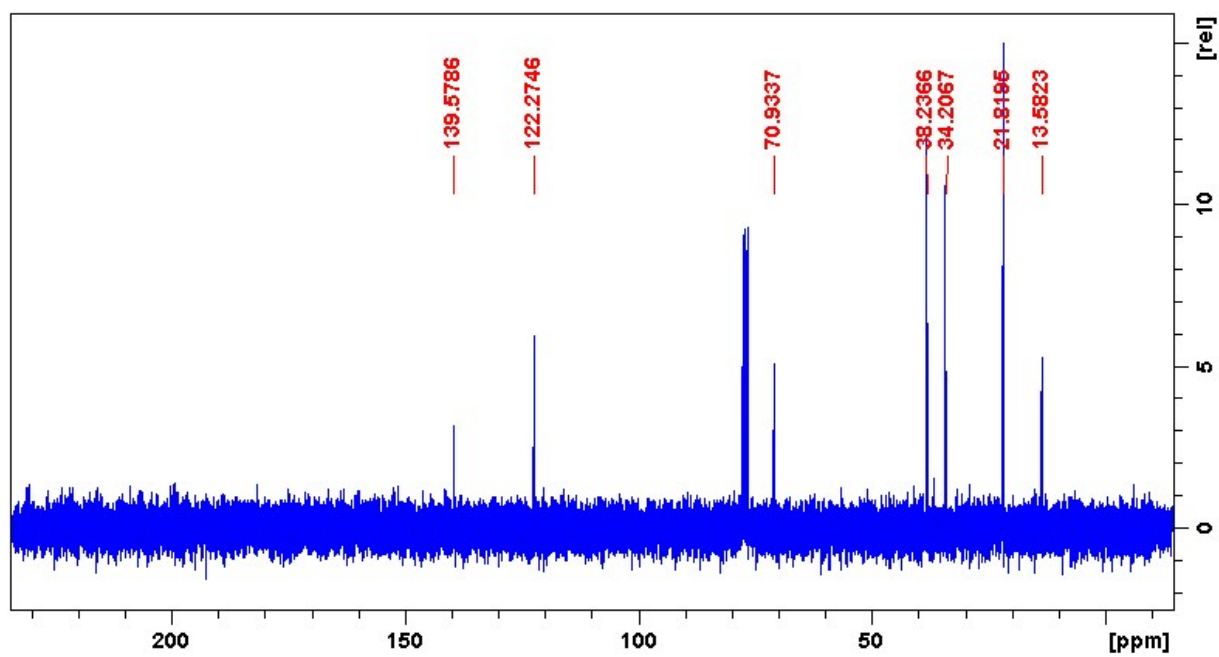

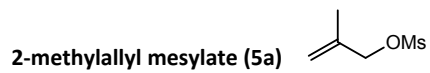

<sup>1</sup>H-NMR

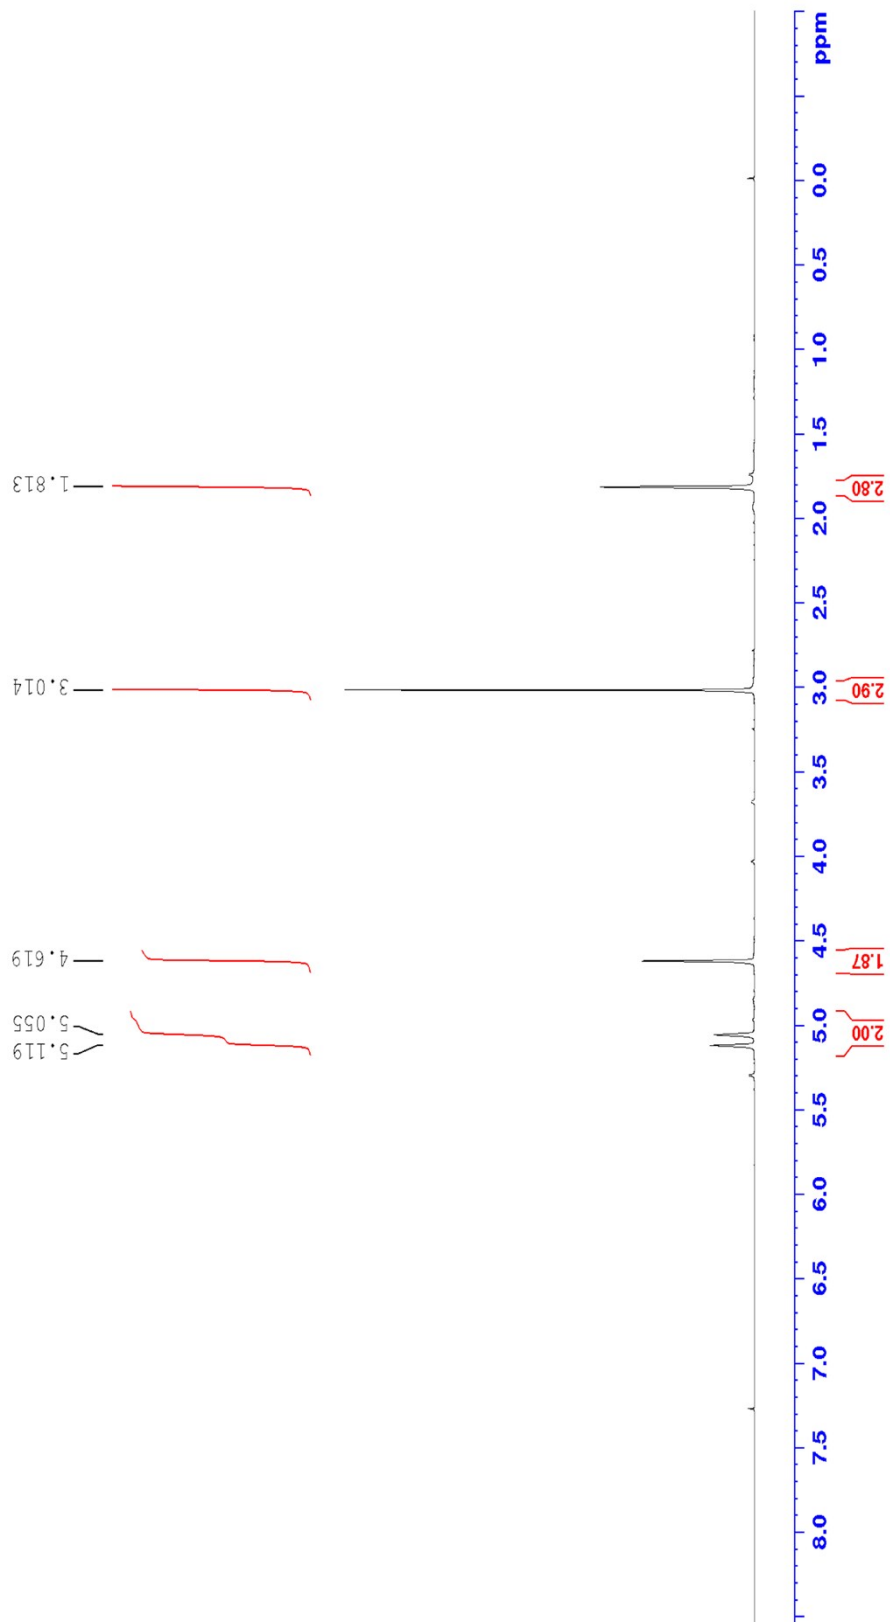

Doublet

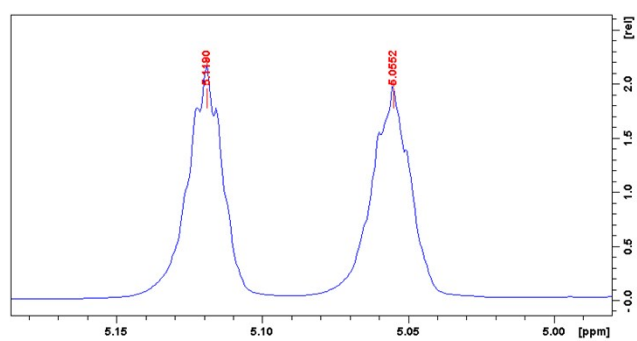

<sup>13</sup>C-NMR

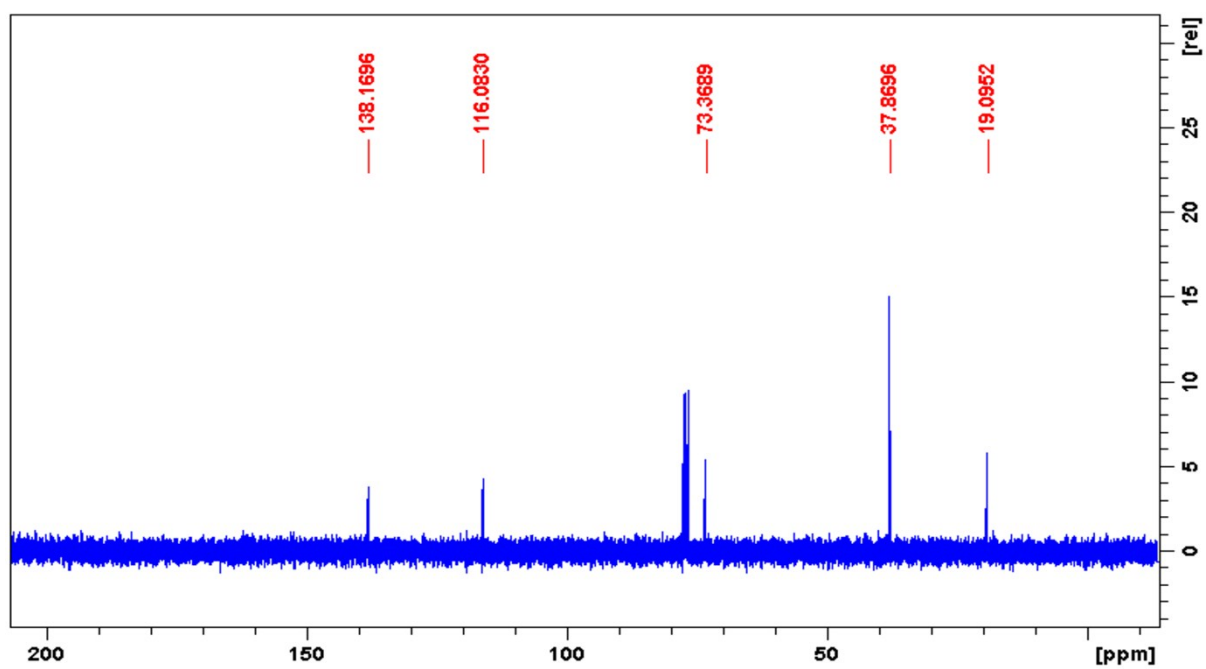



But-3-en-2-yl mesylate (2e)

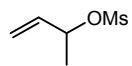

<sup>1</sup>H-NMR

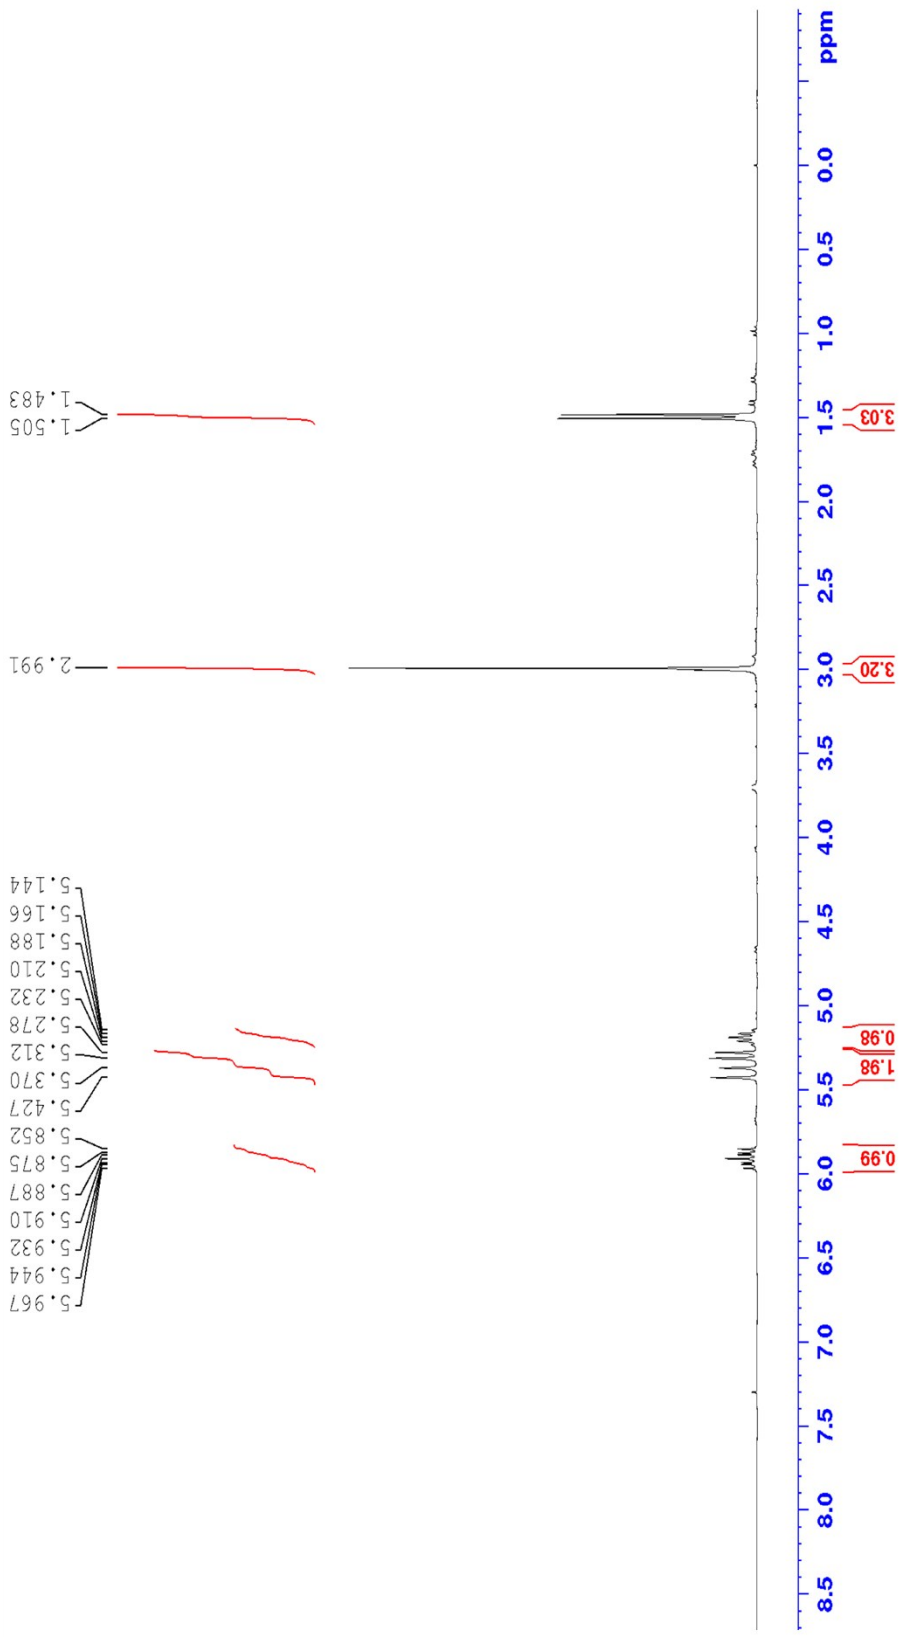

Doublet

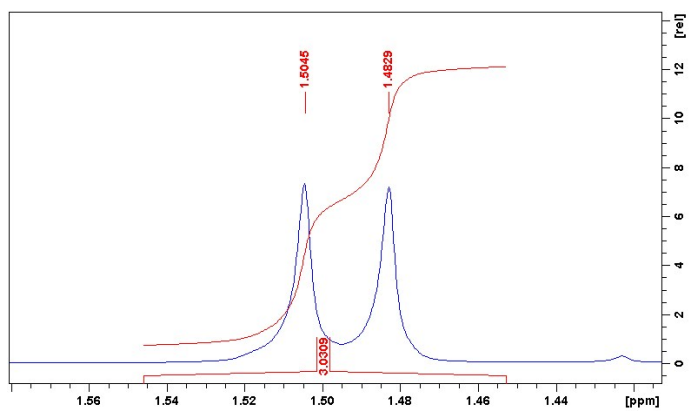

### <sup>13</sup>C-NMR

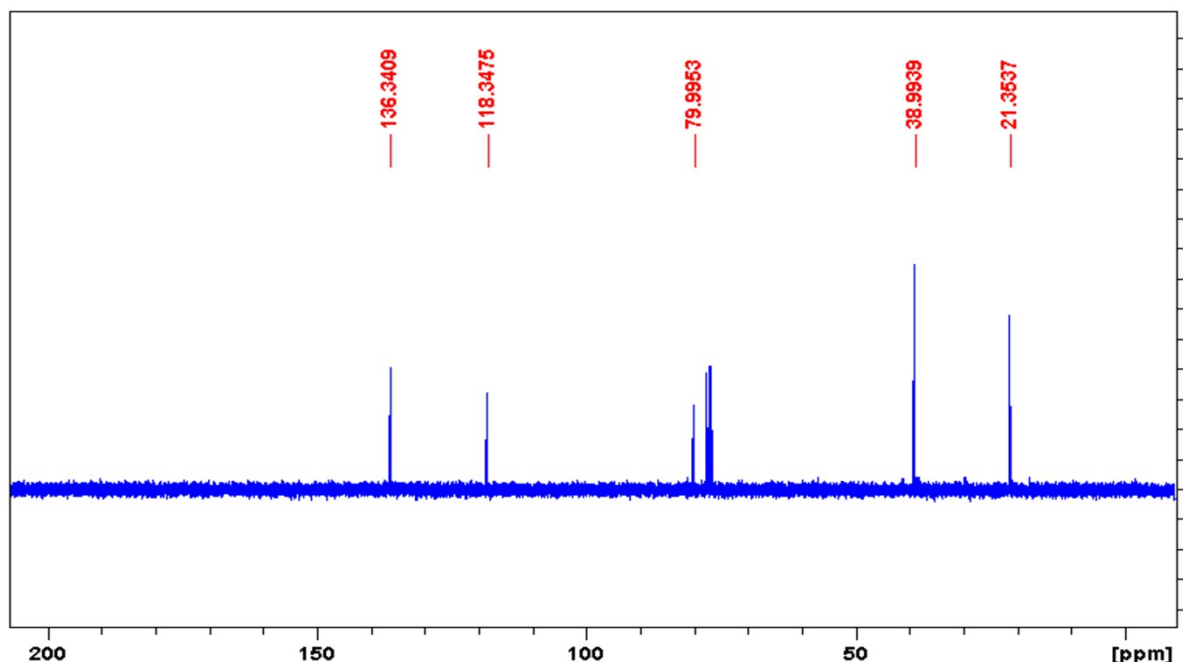

#### 4. General reaction scheme for the synthesis of organic thioacetates

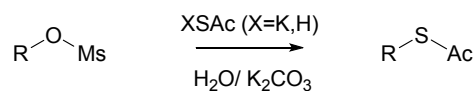

**5. General procedure for the synthesis of benzyl thioacetate (1b), allylic thioacetates (2b-5b) and propargyl thioacetate (6b)**

2.7 mmol of freshly prepared mesylate were put in a one neck round bottom flask. In the same flask 20 ml of 0.4 M aqueous potassium carbonate solution were added. 1.5 eq of potassium thioacetate or acetic acid were added dropwise to the solution under stirring. The mixture was stirred at 40 °C with a reflux condenser for almost 2 hours. The organic phase was extracted with a small portion of diethyl ether and washed three times with water. The organic phase was dried over Na<sub>2</sub>SO<sub>4</sub> and the solvent removed under reduced pressure using a rotary evaporator. The product was recovered as a yellow liquid (GC-MS yield was determined). A high vacuum pump was used to remove any residual solvent and minor impurities, after that the isolated yield was calculated in the usual way as percentage yield from the ratio between the actual yield and the theoretical yield. The theoretical yield was obtained considering the organic mesylate as the limiting reactant. The actual yield was obtained weighing the product after the mentioned work up.

**6. General procedure for the synthesis of primary thioacetates (1d-6d)**

2.8 mmol of freshly prepared mesylate were put in a one neck round bottom flask. In the same flask 20 ml of 0.4 M aqueous potassium carbonate solution were added. 1.5 eq of potassium thioacetate or acetic acid were added to the solution under stirring. The mixture was stirred at 80 °C under reflux for almost 2 hours. The organic phase was extracted with a small portion of diethyl ether and washed three times with water. The organic phase was dried over Na<sub>2</sub>SO<sub>4</sub> and the solvent removed under reduced pressure using a rotary evaporator. The product was recovered as a yellow liquid (GC-MS yield was determined). A high vacuum pump was used to remove any residual solvent and minor impurities, after that the isolated yield was calculated in the usual way as percentage yield from the ratio between the actual yield and the theoretical yield. The theoretical yield was obtained considering the organic mesylate as the limiting reactant. The actual yield was obtained weighing the product after the mentioned work up.

**7. General, Experimental and Analytical Information**

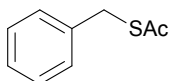

**Benzyl thioacetate (1b)** was prepared in accordance to the general procedure.

Benzyl mesylate (1a) (0.5g, 2.7 mmol) was put in a one neck round bottom flask. In the same flask 20 ml of 0.4 M aqueous potassium carbonate solution were added. 1.5 eq of potassium thioacetate or acetic acid were added dropwise to the solution under stirring. The mixture was stirred at 40 °C with a reflux condenser for almost 2 hours. The organic phase was extracted with a small portion of diethyl ether and washed three times with water. The organic phase was dried over Na<sub>2</sub>SO<sub>4</sub> and the solvent removed under vacuum. The product was recovered as a yellow liquid in 94 % yield (GC-MS). Isolated yield after work up: 89%. GC-MS spectra comparable to those reported in literature.<sup>18</sup> <sup>1</sup>H-NMR: (300 MHz, CDCl<sub>3</sub>, 25°C) δ = 2.33 (s, CH<sub>3</sub>), 4.11

(s, CH<sub>2</sub>), 7.20-7.36 (m, 5H). <sup>13</sup>C-NMR: (75 MHz, CDCl<sub>3</sub>, 25°C) δ = 30.29(CH<sub>3</sub>), 33.48(CH<sub>2</sub>S), 126.99(CH), 127.28(CH), 128.56(CH), 128.64(CH), 128.82(CH), 137.61(CH), 195.10(C=O).

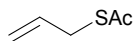

**Allyl thioacetate (2b)** was prepared in accordance to the general procedure.

Allyl mesylate (2a) (0.37g, 2.7 mmol) was put in a one neck round bottom flask. In the same flask 20 ml of 0.4 M aqueous potassium carbonate solution were added. 1.5 eq of potassium thioacetate or acetic acid were added dropwise to the solution under stirring. The mixture was stirred at 40 °C with a reflux condenser for almost 2 hours. After the usual work up the product was recovered as a yellow liquid obtained in 96 % yield (GC-MS) . Isolated yield after work up: 92%. <sup>1</sup>H-NMR: (300 MHz, CDCl<sub>3</sub>, 25°C) δ = 2.33 (3H, s, CH<sub>3</sub>), 3.53 (2H, d, <sup>3</sup>J = 7Hz, CH<sub>2</sub>S), 5.08-5.26 (2H, m, CH=CH<sub>2</sub>), 5.73-5.93 (1H, m, CH=CH<sub>2</sub>). <sup>13</sup>C-NMR : (75 MHz, CDCl<sub>3</sub>, 25°C) δ = 30.48 (CH<sub>3</sub>), 32.01 (CH<sub>2</sub>S), 117.88 (CH=CH<sub>2</sub>), 133.07 (CH=CH<sub>2</sub>), 195.12 (C=O).

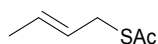

**trans-2-butenyl thioacetate (3b)** was prepared in accordance to the general procedure.

trans-2-butenyl mesylate (3a) (0.40g, 2.7 mmol) was put in a one neck round bottom flask. In the same flask 20 ml of 0.4 M aqueous potassium carbonate solution were added. 1.5 eq of potassium thioacetate or acetic acid were added dropwise to the solution under stirring. The mixture was stirred at 40 °C with a reflux condenser for almost 2 hours. After the usual work up the product was recovered as a yellow liquid obtained in 97% yield (GC-MS) . Isolated yield after work up: 91%. GC-MS(ESI): m/z (%) , 149 (M<sup>+</sup>, 31), 88 (35), 55 (73), 53 (15), 43 (100). <sup>1</sup>H-NMR: (300 MHz, CDCl<sub>3</sub>, 25°C) δ = 1.65-1.68 (3H, m, CH<sub>3</sub>), 2.32 (3H, s, CH<sub>3</sub>), 3.48 (2H, bd, <sup>3</sup>J = 7Hz, CH<sub>2</sub>), 5.37-5.48 (1H, m, CH=CH), 5.57-5.72 (1H, m, CH=CH) . <sup>13</sup>C-NMR : (75 MHz, CDCl<sub>3</sub>, 25°C) δ = 17.53 (CH<sub>3</sub>-CH), 30.29(CH<sub>3</sub>-C=O), 31.25 (CH<sub>2</sub>-S), 125.63 (CH=CH), 129.03 (CH=CH), 195.04 (C=O).

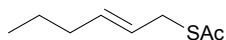

**trans-2-hexenyl thioacetate (4b)** was prepared in accordance to the general procedure.

trans-2-hexenyl mesylate (4a) (0.48g, 2.7 mmol) was put in a one neck round bottom flask. In the same flask 20 ml of 0.4 M aqueous potassium carbonate solution were added. 1.5 eq of potassium thioacetate or acetic acid were added dropwise to the solution under stirring. The mixture was stirred at 40 °C with a reflux condenser for almost 2 hours. After the usual work up the product was recovered as a yellow liquid obtained in 93% yield (GC-MS) . Isolated yield after work up: 89%. GC-MS(ESI): m/z (%) , 158 (M<sup>+</sup>, 0.4), 116 (19), 82 (81), 73 (9), 67 (30), 55 (67), 43 (100), 41 (38) . <sup>1</sup>H-NMR: (300 MHz, CDCl<sub>3</sub>, 25°C) δ = 0.87 (3H, t, <sup>3</sup>J=7.2Hz, CH<sub>3</sub>), 1.37 (2H, sextuplet, <sup>3</sup>J=7.3Hz, CH<sub>2</sub>-CH<sub>3</sub>), 1.98 (2H, dt, <sup>3</sup>J = 7Hz, <sup>3</sup>J=7Hz, CH<sub>2</sub>-CH=), 2.32 (3H, s, CH<sub>3</sub>), 3.49 (2H, bd, <sup>3</sup>J=7Hz, CH<sub>2</sub>-S), 5.36-5.46 (1H, m, CH=CH), 5.60-5.69 (1H, m, CH=CH). <sup>13</sup>C-NMR : (75 MHz, CDCl<sub>3</sub>, 25°C) δ = 13.55 (CH<sub>3</sub>-CH<sub>2</sub>), 22.21(CH<sub>2</sub>-CH<sub>3</sub>), 30.45, 31.48, 34.28, 124.55(CH=CH), 134.54(CH=CH), 195.41(C=O).

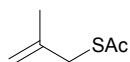

**2-methylallyl thioacetate (5b)** was prepared in accordance to the general procedure.

2-methylallyl mesylate (5a) (0.40g, 2.7 mmol) was put in a one neck round bottom flask. In the same flask 20 ml of 0.4 M aqueous potassium carbonate solution were added. 1.5 eq of potassium thioacetate or acetic acid were added dropwise to the solution under stirring. The mixture was stirred at 40 °C with a reflux condenser for almost 2 hours. After the usual work up the product was recovered as a yellow liquid obtained in 97% yield (GC-MS) . Isolated yield after work up: 93%. GC-MS(ESI): m/z (%) , 130 (M<sup>+</sup>, 0.4), 88 (90), 55 (25), 45 (11), 43 (100) . <sup>1</sup>H-NMR: (300 MHz, CDCl<sub>3</sub>, 25°C) δ = 1.75-1.76 (3H, m, CH<sub>3</sub>-C), 2.35 (3H,s, CH<sub>3</sub>-C=O), 3.54 (2H,s , CH<sub>2</sub>-S), 4.89 (2H, dt, <sup>2</sup>J=34.1Hz, <sup>4</sup>J=0.9Hz, CH<sub>2</sub>=C). <sup>13</sup>C-NMR : (75 MHz, CDCl<sub>3</sub>, 25°C) δ = 21.15(CH<sub>3</sub>-C), 30.40 (CH<sub>3</sub>-C=O), 35.98(CH<sub>2</sub>-S), 113.97(CH<sub>2</sub>=C), 140.72 (C=CH<sub>2</sub>), 195.14(C=O).

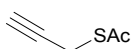

**S-Prop-2-ynyl-thioacetate (6b)** was prepared in accordance to the general procedure.

S-prop-2-ynyl mesylate (6a) (0.36g, 2.7 mmol) was put in a one neck round bottom flask. In the same flask 20 ml of 0.4 M aqueous potassium carbonate solution were added. 1.5 eq of potassium thioacetate or acetic acid were added dropwise to the solution under stirring. The mixture was stirred at 40 °C with a reflux condenser for almost 2 hours. After the usual work up the product was recovered as a yellow liquid obtained in 94% yield (GC-MS). Isolated yield after work up: 90%. GC-MS comparable to those reported in literature.<sup>19</sup> <sup>1</sup>H-NMR: (300 MHz, CDCl<sub>3</sub>, 25°C): δ = 2.15 (1H, t, <sup>4</sup>J=2.7Hz, CH≡C), 2.36 (3H,s, CH<sub>3</sub>-C=O), 3.64 (2H, d, <sup>4</sup>J=2.7Hz, CH<sub>2</sub>). <sup>13</sup>C-NMR : δ = 17.45(CH<sub>2</sub>), 30.11(CH<sub>3</sub>-C=O), 70.86 (C≡C), 78.75 (C≡C), 193.70 (C=O).

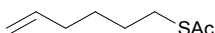

**5-Acetylsulfanyl-hex-1-ene (1d)** was prepared in accordance to the general procedure.

5-hexenyl mesylate (1c) (0.50g, 2.8 mmol) was put in a one neck round bottom flask. In the same flask 20 ml of 0.4 M aqueous potassium carbonate solution were added. 1.5 eq of potassium thioacetate or acetic acid were added dropwise to the solution under stirring. The mixture was stirred at 80 °C under reflux for almost 2 hours. After the usual work up the product was recovered as a yellow liquid obtained in 96% yield (GC-MS) . Isolated yield after work up: 92%. GC-MS(ESI): m/z (%) , 158 (M<sup>+</sup>, 0.4), 115 (69), 100 (11), 87 (6), 81 (11), 67 (8), 54 (4), 43 (100), 41 (11) . <sup>1</sup>H-NMR: (300 MHz, CDCl<sub>3</sub>, 25°C): δ = 1.43-1.50 (2H, m, CH<sub>2</sub>), 1.54-1.61 (2H,m, CH<sub>2</sub>), 2.06 (2H, m, CH<sub>2</sub>-CH<sub>2</sub>-CH<sub>2</sub>), 2.33 (3H, s, CH<sub>3</sub>), 2.87 (2H,t, <sup>3</sup>J=7Hz,CH<sub>2</sub>S), 4.94-5.04 (2H, m, CH<sub>2</sub>=C), 5.74-5.83 (1H, m, CH=C). <sup>13</sup>C-NMR : δ = 27.99, 28.9, 28.9 30.60, 33.18, 114.75 (CH<sub>2</sub>=), 138.33(CH=), 195.88 (C=O).

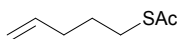

**S-Pent-4-en-1-yl ethanethioate (2d)** was prepared in accordance to the general procedure.

4-pentenyl mesylate (2c) (0.45g, 2.8 mmol) was put in a one neck round bottom flask. In the same flask 20 ml of 0.4 M aqueous potassium carbonate solution were added. 1.5 eq of potassium thioacetate or acetic acid were added dropwise to the solution under stirring. The mixture was stirred at 80 °C under reflux for almost 2 hours. After the usual work up the product was recovered as a yellow liquid obtained in 97% yield (GC-MS) . Isolated yield after work up: 93%. GC-MS: m/z (%) , 144 (M<sup>+</sup>, 0.4), 101 (96), 86 (8), 67 (29), 59 (9), 55 (6), 47 (4), 43 (100) . <sup>1</sup>H-NMR: (300 MHz, CDCl<sub>3</sub>, 25°C): δ = 1.66 (2H, quintet, <sup>3</sup>J=7.3Hz, CH<sub>2</sub>-CH<sub>2</sub>-CH<sub>2</sub>), 2.08-2.13 (2H,m, CH<sub>2</sub>), 2.31 (3H, s, CH<sub>3</sub>-C=O), 2.87 (2H, t, <sup>3</sup>J=7.3Hz, CH<sub>2</sub>S), 4.96-5.05 (2H, m, CH<sub>2</sub>=CH), 5.70-5.81 (1H, m, CH=CH<sub>2</sub>). <sup>13</sup>C-NMR : (75 MHz, CDCl<sub>3</sub>, 25°C) δ = 28.49, 30.59, 32.73, 115.39(CH<sub>2</sub>=CH), 137.39 (CH=CH<sub>2</sub>), 208.89(C=O). NMR spectra comparable to those reported in literature.<sup>20,21</sup>

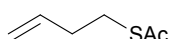

**Thioacetic acid S-but-3-enyl ester (3d)** was prepared in accordance to the general procedure.

4-butenyl mesylate (3c) (0.42g, 2.8 mmol) was put in a one neck round bottom flask. In the same flask 20 ml of 0.4 M aqueous potassium carbonate solution were added. 1.5 eq of potassium thioacetate or acetic acid were added dropwise to the solution under stirring. The mixture was stirred at 80 °C under reflux for almost 2 hours. After the usual work up the product was recovered as a yellow liquid obtained in 96% yield (GC-MS) . Isolated yield after work up: 93%. GC-MS(ESI): m/z (%) , 130 (M<sup>+</sup>, 0.4), 88 (23), 87 (15), 71 (19), 54 (10), 45 (6), 43 (100) . <sup>1</sup>H-NMR: (300 MHz, CDCl<sub>3</sub>, 25°C): δ = 2.29-2.35 (2H, m, CH<sub>2</sub>-CH), 2.33 (3H,s, CH<sub>3</sub>), 2.94 (2H, t, <sup>3</sup>J=7.3Hz, CH<sub>2</sub>-CH<sub>2</sub>), 5.02-5.11 (2H, m, CH<sub>2</sub>=), 5.71-5.85 (1H,m). <sup>13</sup>C-NMR : (75 MHz, CDCl<sub>3</sub>, 25°C) δ = 28.26(CH<sub>2</sub>), 30.50 (CH<sub>3</sub>),33.50 (CH<sub>2</sub>), 116.34(CH<sub>2</sub>), 135.99 (CH), 195.46(C=O).

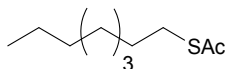

**S-Octyl thioacetate (4d)** was prepared in accordance to the general procedure.

Octane mesylate (4c) (0.58g, 2.8 mmol) was put in a one neck round bottom flask. In the same flask 20 ml of 0.4 M aqueous potassium carbonate solution were added. 1.5 eq of potassium thioacetate or acetic acid were added dropwise to the solution under stirring. The mixture was stirred at 80 °C under reflux for almost 2 hours. After the usual work up the product was recovered as a yellow liquid obtained in 95% yield (GC-MS) . Isolated yield after work up: 90%. GC-MS comparable to those reported in literature.<sup>22</sup> NMR spectra comparable to those reported in literature.<sup>23</sup>

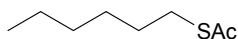

**S-Hexyl thioacetate (5d)** was prepared in accordance to the general procedure.

Hexane mesylate (5c) (0.50g, 2.8 mmol) was put in a one neck round bottom flask. In the same flask 20 ml of 0.4 M aqueous potassium carbonate solution were added. 1.5 eq of potassium thioacetate or acetic acid were added dropwise to the solution under stirring. The mixture was stirred at 80 °C under reflux for almost 2 hours. After the usual work up the product was recovered as a yellow liquid obtained in 96% yield (GC-MS) . Isolated yield after work up: 92%. <sup>1</sup>H-NMR: (300 MHz, CDCl<sub>3</sub>, 25°C): δ = 0.86-0.92 (3H, m, CH<sub>3</sub>CH<sub>2</sub>), 1.25-1.38 (6H,m, CH<sub>2</sub>CH<sub>2</sub>CH<sub>2</sub>), 1.51-1.61 (2H, quintet, <sup>3</sup>J=7.4Hz, CH<sub>2</sub>), 2.32 (3H, s, CH<sub>3</sub>), 2.86 (2H,t, <sup>3</sup>J=7.2Hz,CH<sub>2</sub>S). <sup>13</sup>C-NMR : (75 MHz, CDCl<sub>3</sub>, 25°C) δ = 13.94, 22.47, 28.46, 29.15, 29.45, 31.28, 32.78, 208.89 (C=O).

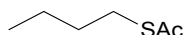

**S-Butyl thioacetate (6d)** was prepared in accordance to the general procedure.

Butane mesylate (6c) (0.42g, 2.8 mmol) was put in a one neck round bottom flask. In the same flask 20 ml of 0.4 M aqueous potassium carbonate solution were added. 1.5 eq of potassium thioacetate or acetic acid were added dropwise to the solution under stirring. The mixture was stirred at 80 °C under reflux for almost 2 hours. After the usual work up the product was recovered as a yellow liquid obtained in 97% yield (GC-MS) . Isolated yield after work up: 95%. GC-MS comparable to those reported in literature.<sup>24</sup> <sup>1</sup>H-NMR: (300 MHz, CDCl<sub>3</sub>, 25°C): δ = 0.90 (3H, t, <sup>2</sup>J=7.5, CH<sub>3</sub>CH<sub>2</sub>), 1.37 (2H,sext, <sup>2</sup>J=7.4Hz, CH<sub>3</sub>CH<sub>2</sub>CH<sub>2</sub>), 1.49-1.59 (2H, quintet, <sup>3</sup>J=7.5Hz, CH<sub>2</sub>-CH<sub>2</sub>-CH<sub>2</sub>), 2.31 (3H, s, CH<sub>3</sub>C=O), 2.86 (2H,t, <sup>3</sup>J=7.4Hz,CH<sub>2</sub>S). <sup>13</sup>C-NMR : (75 MHz, CDCl<sub>3</sub>, 25°C) δ = 13.53, 21.91, 28.83, 31.56, 195.91 (C=O). NMR spectra comparable to those reported in literature.<sup>25</sup>

a. GC-MS SPECTRA

**trans-2-butenyl thioacetate (3b)**

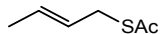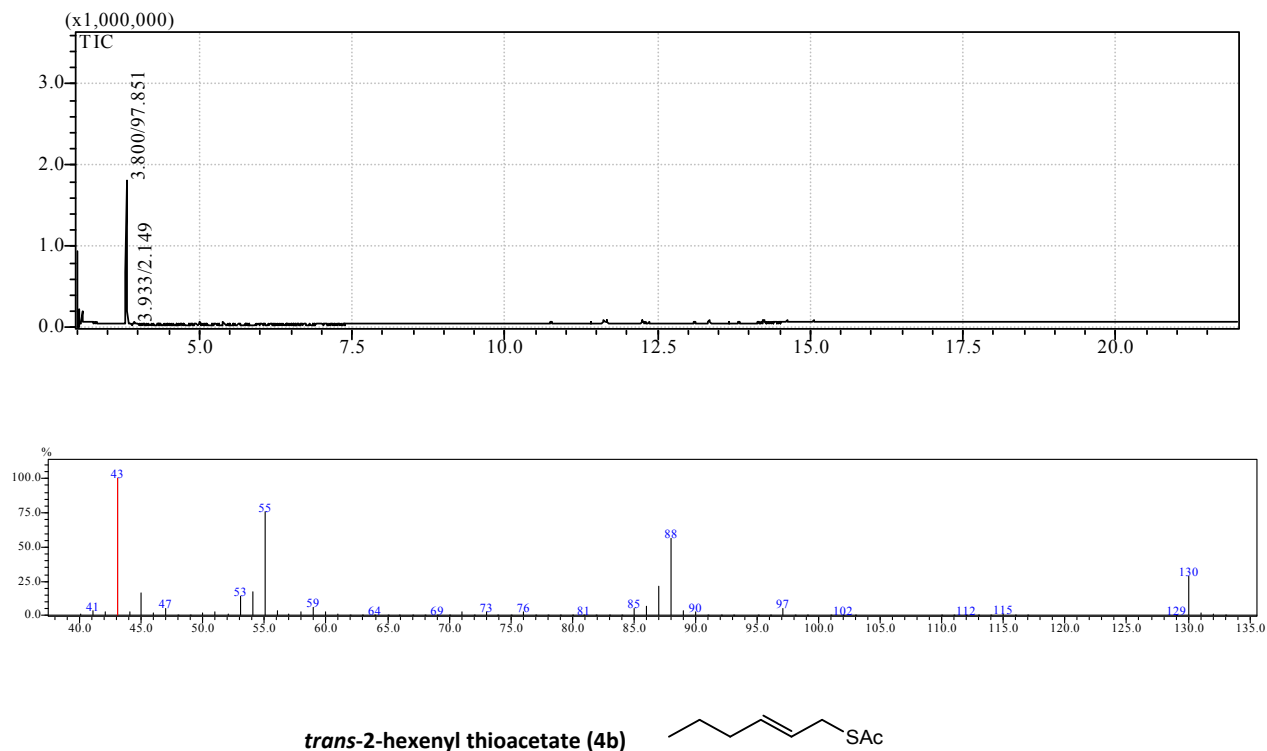

**trans-2-hexenyl thioacetate (4b)**

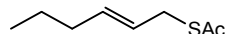



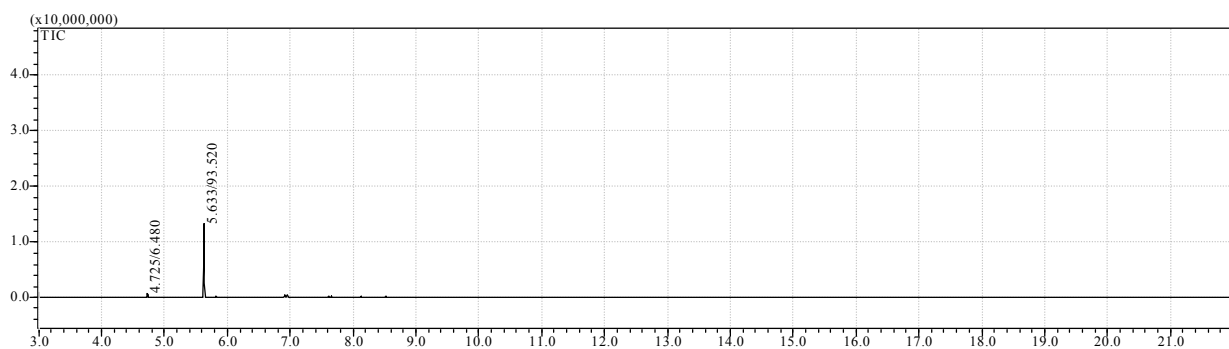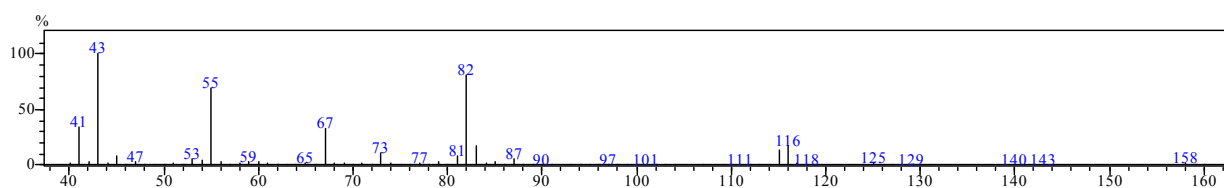

5-Acetylsulfanyl-hex-1-ene (1d)

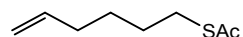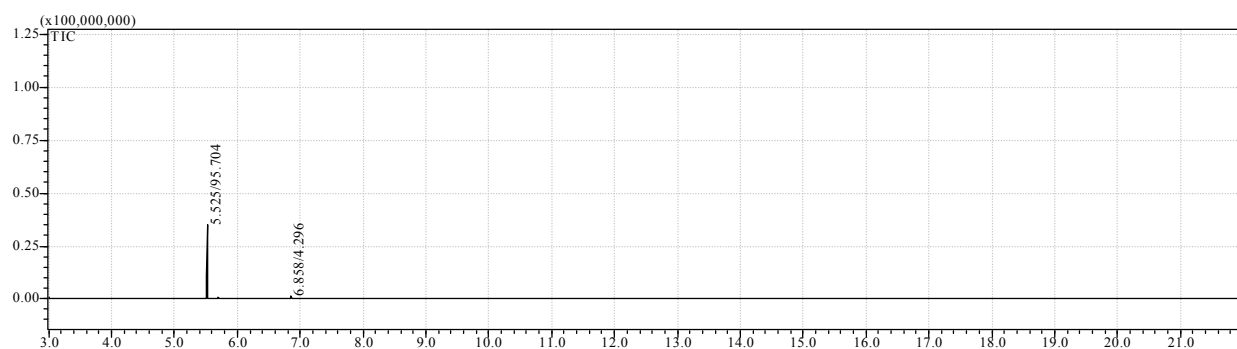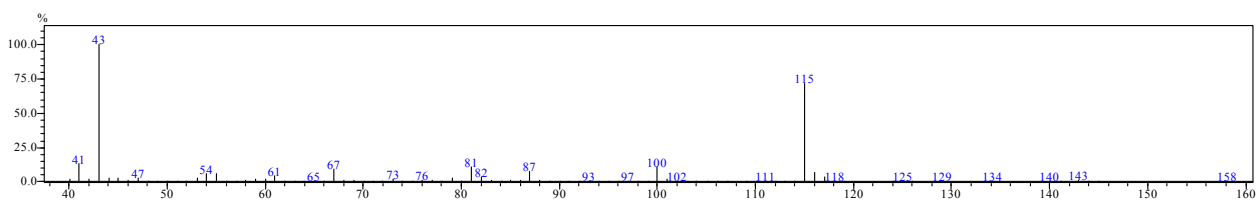

S-Pent-4-en-1-yl ethanethioate (2d)

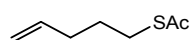

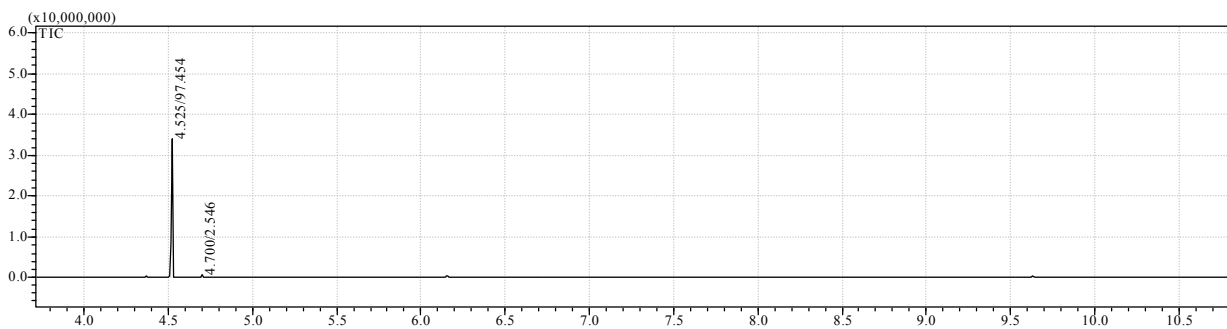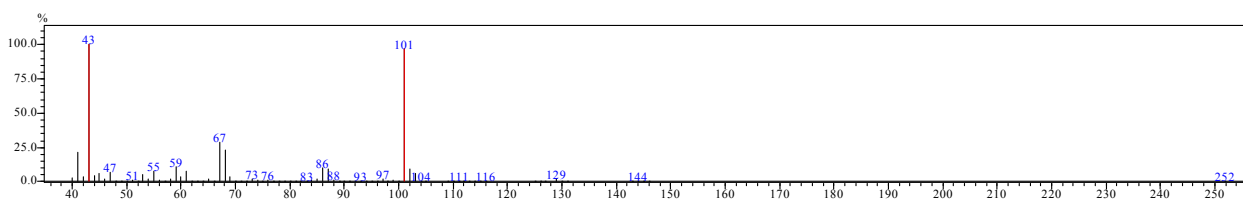

Thioacetic acid S-but-3-enyl ester (3d)

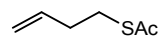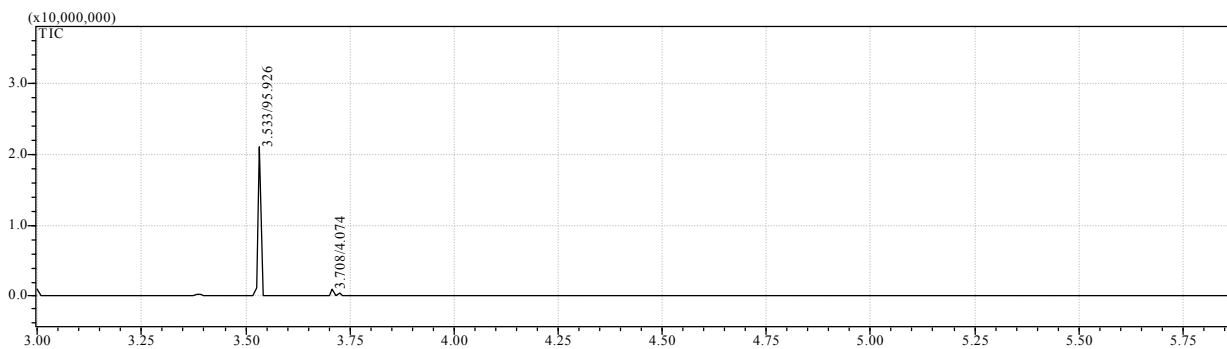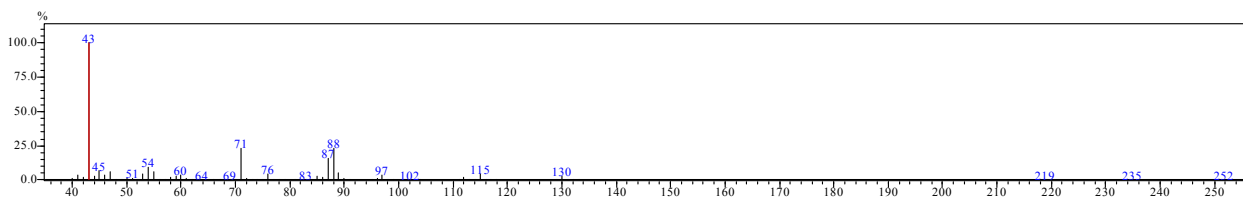

2-methylallyl thioacetate (5b)

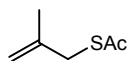

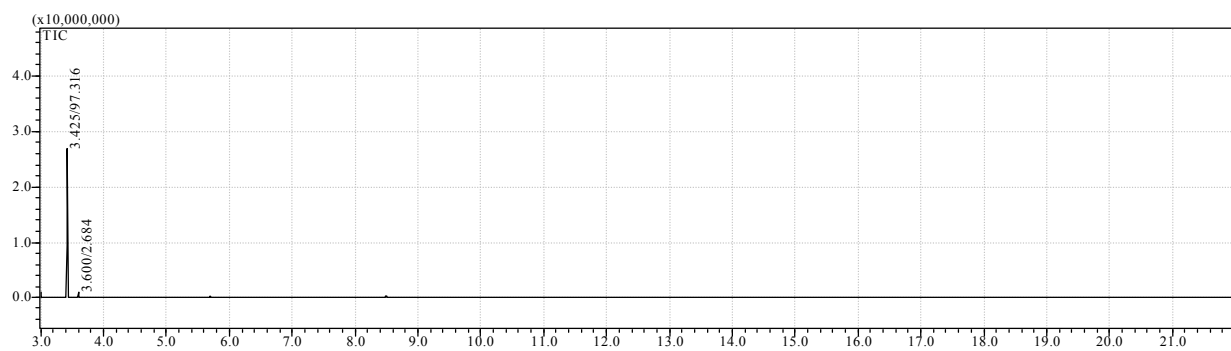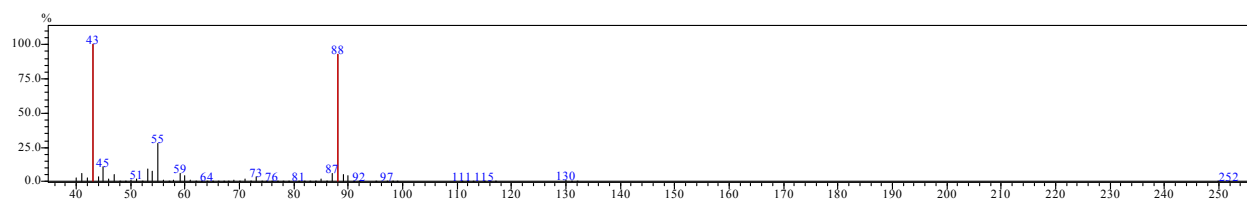

**b. NMR SPECTRA**

Benzyl thioacetate (1b)

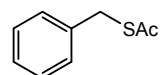

<sup>1</sup>H-NMR

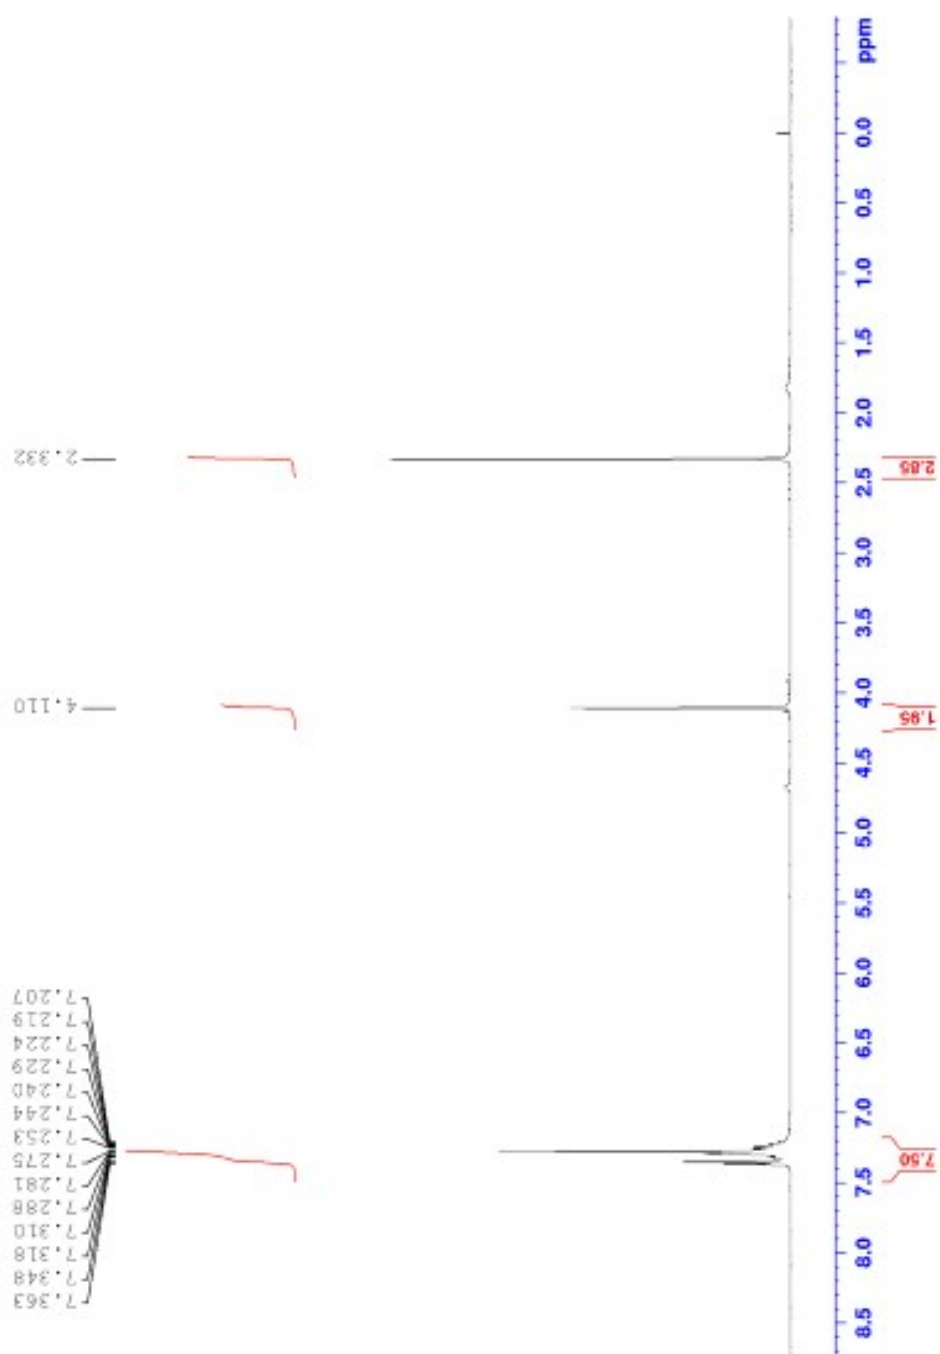

<sup>13</sup>C-NMR

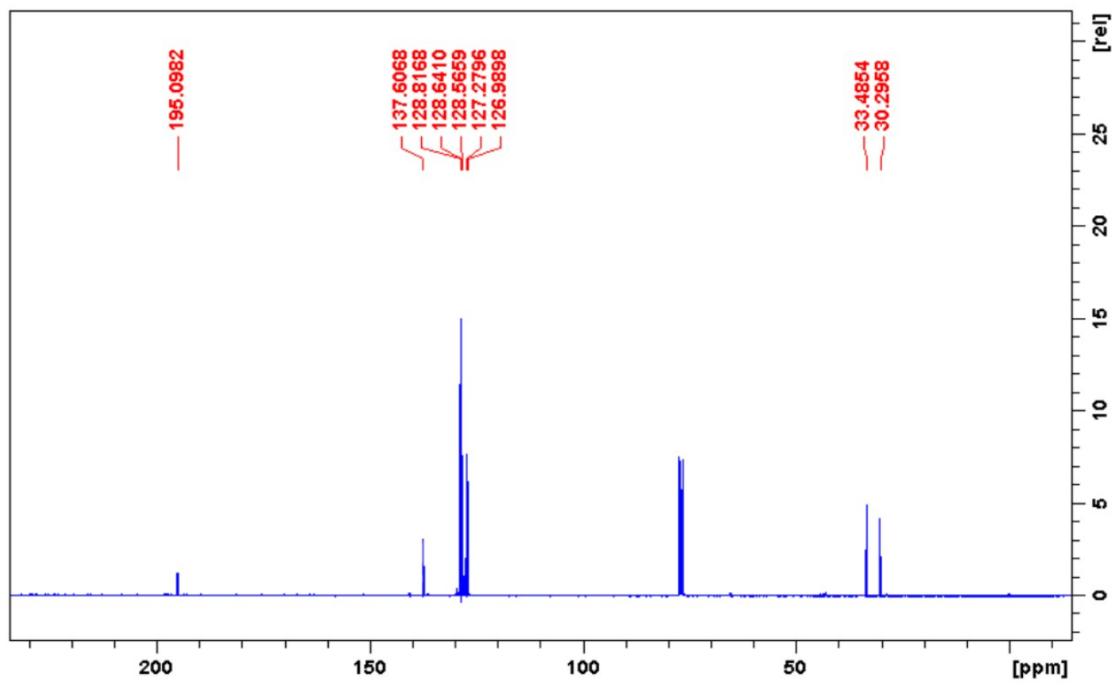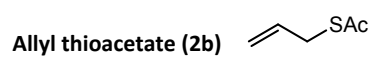

<sup>1</sup>H-NMR

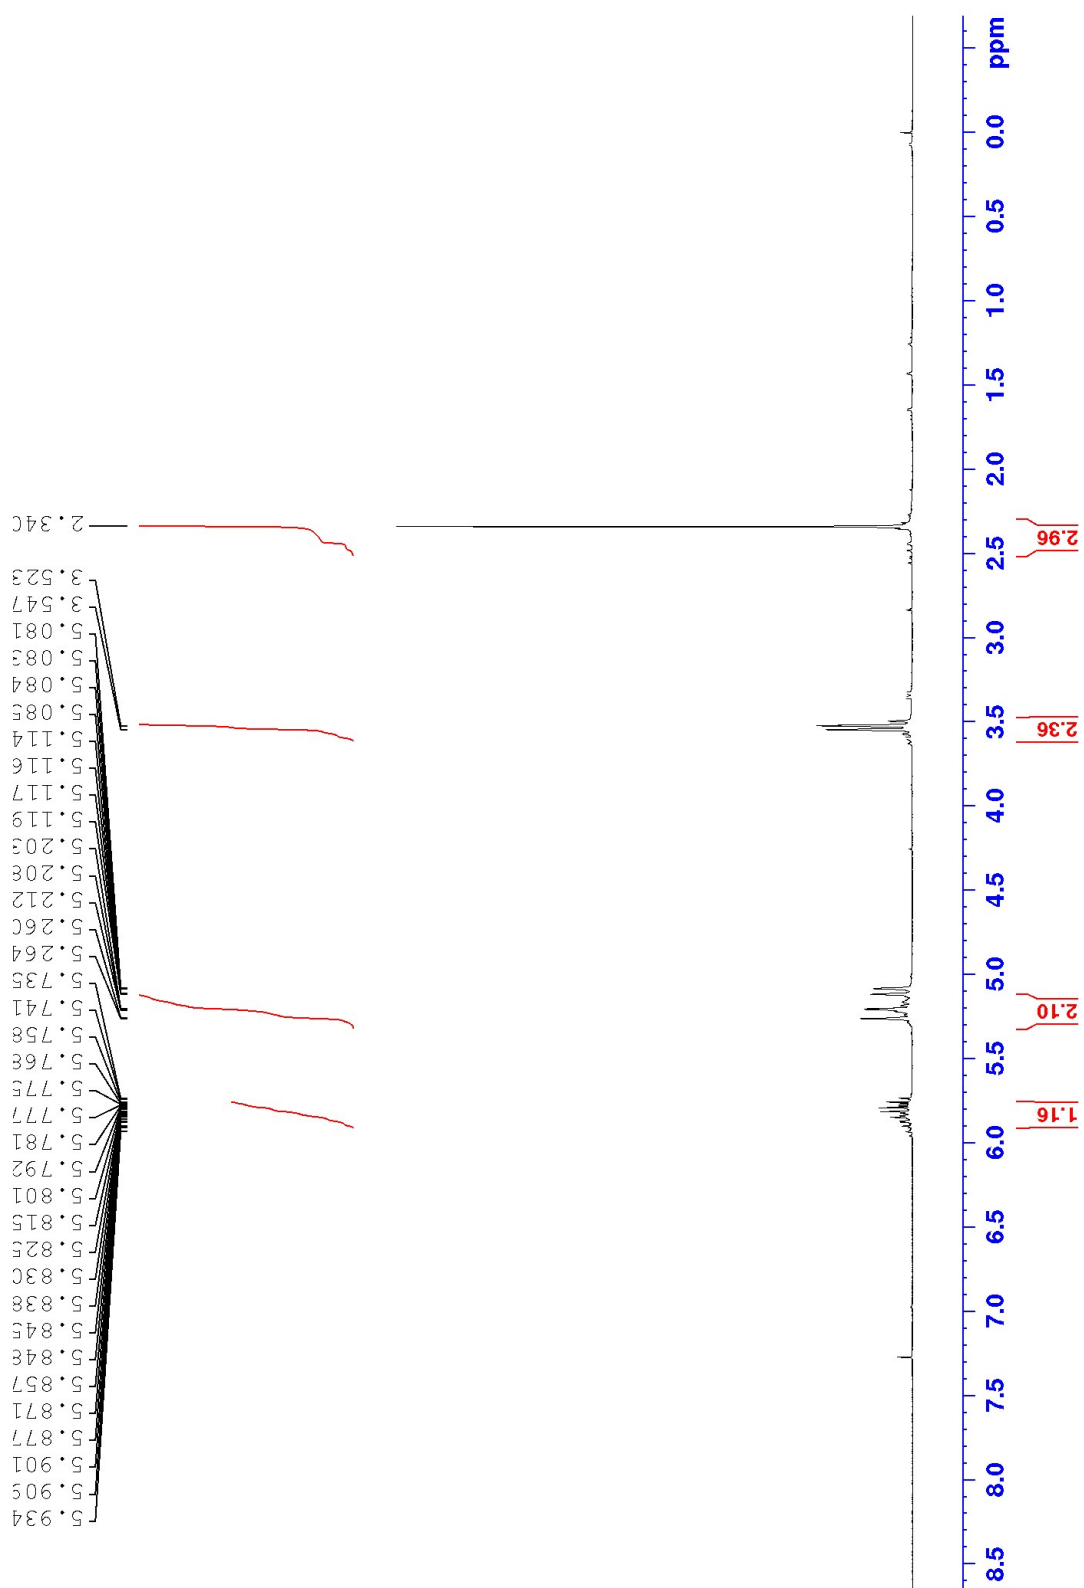

Doublet

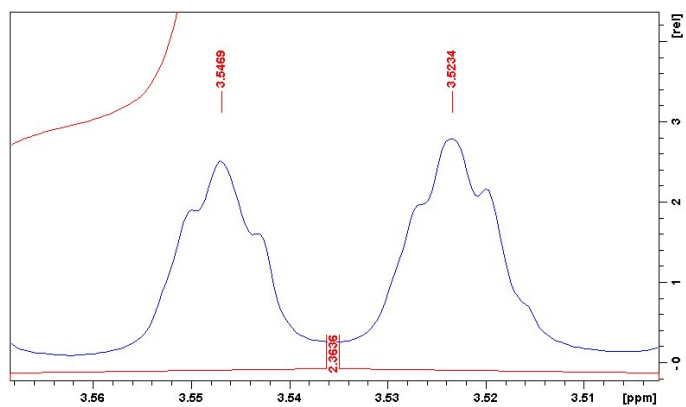

<sup>13</sup>C-NMR

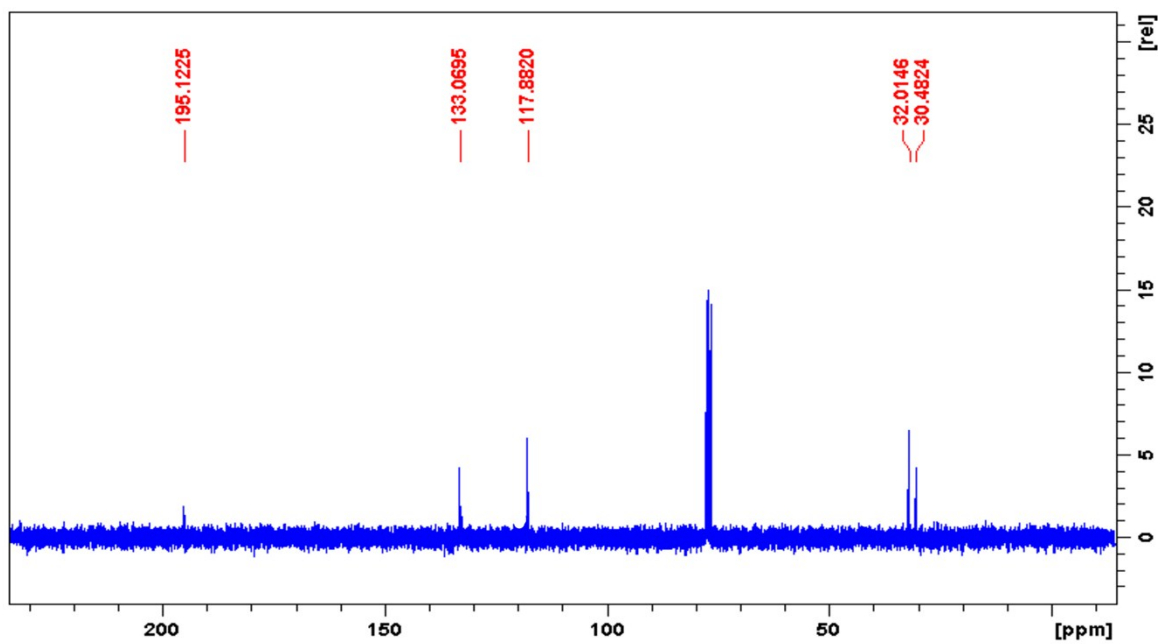

<sup>1</sup>H-NMR

*trans*-2-butenyl thioacetate (3b)

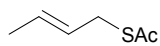

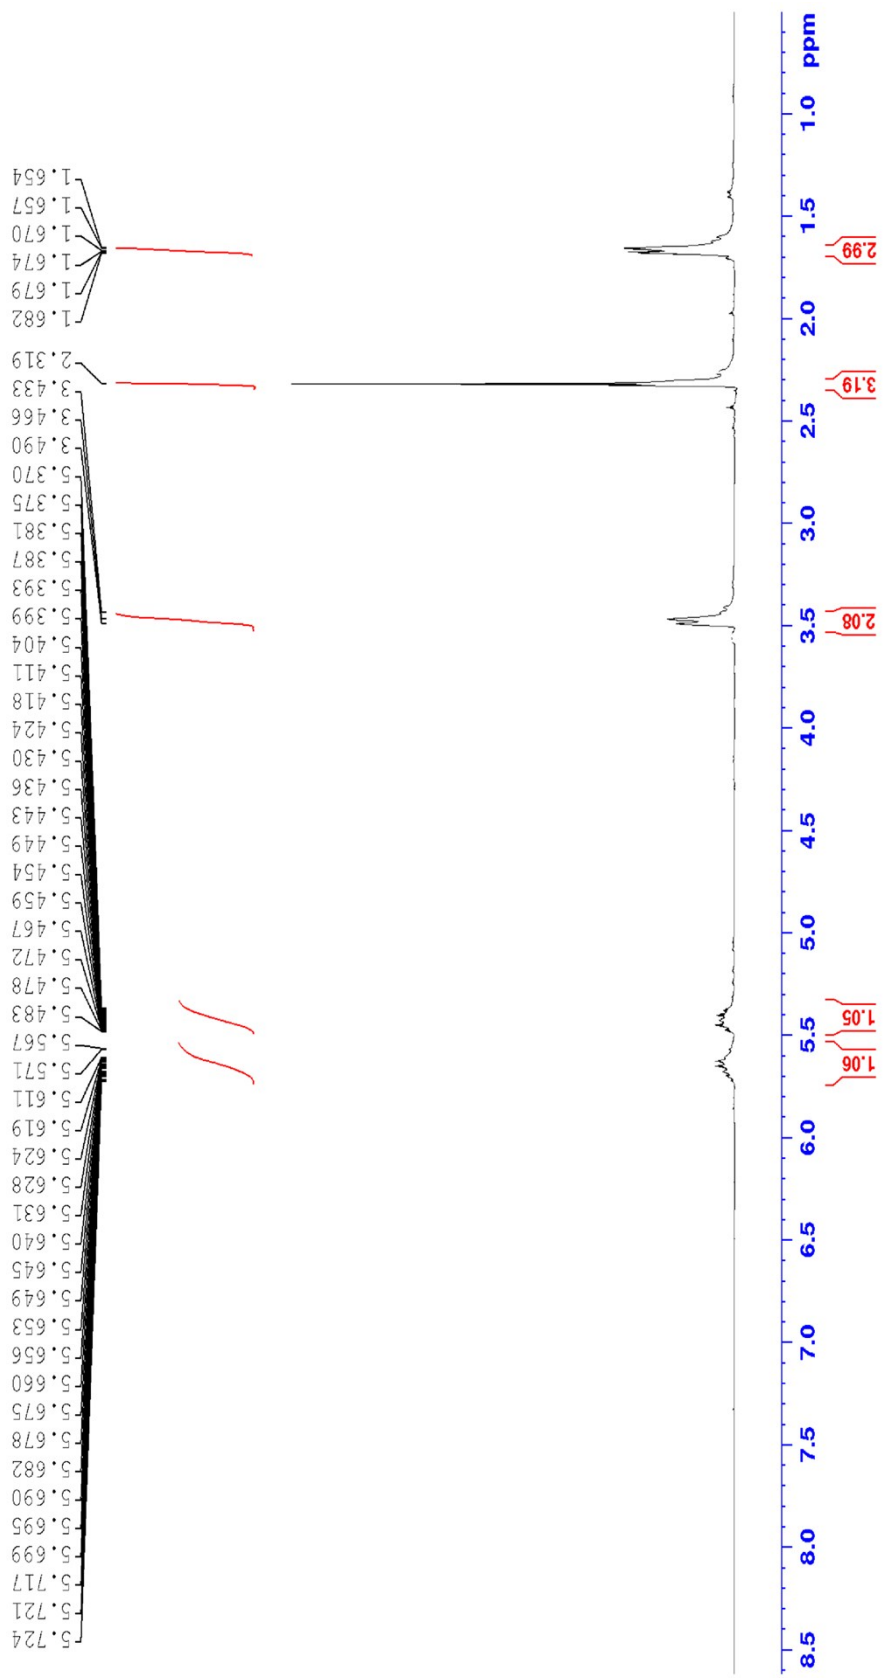

Doublet



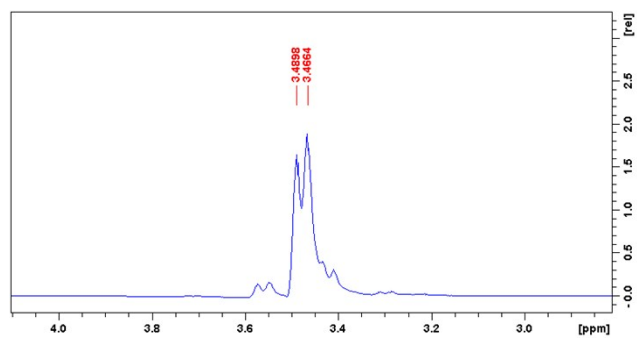

<sup>13</sup>C-NMR

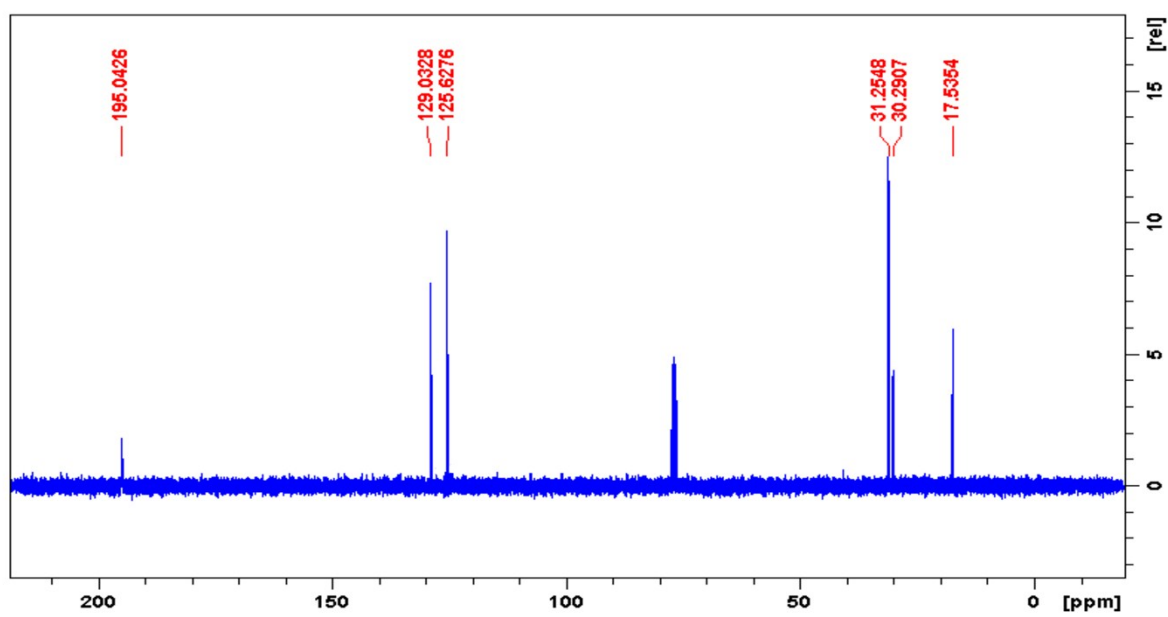

*trans*-2-hexenyl thioacetate (4b)

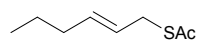

<sup>1</sup>H-NMR

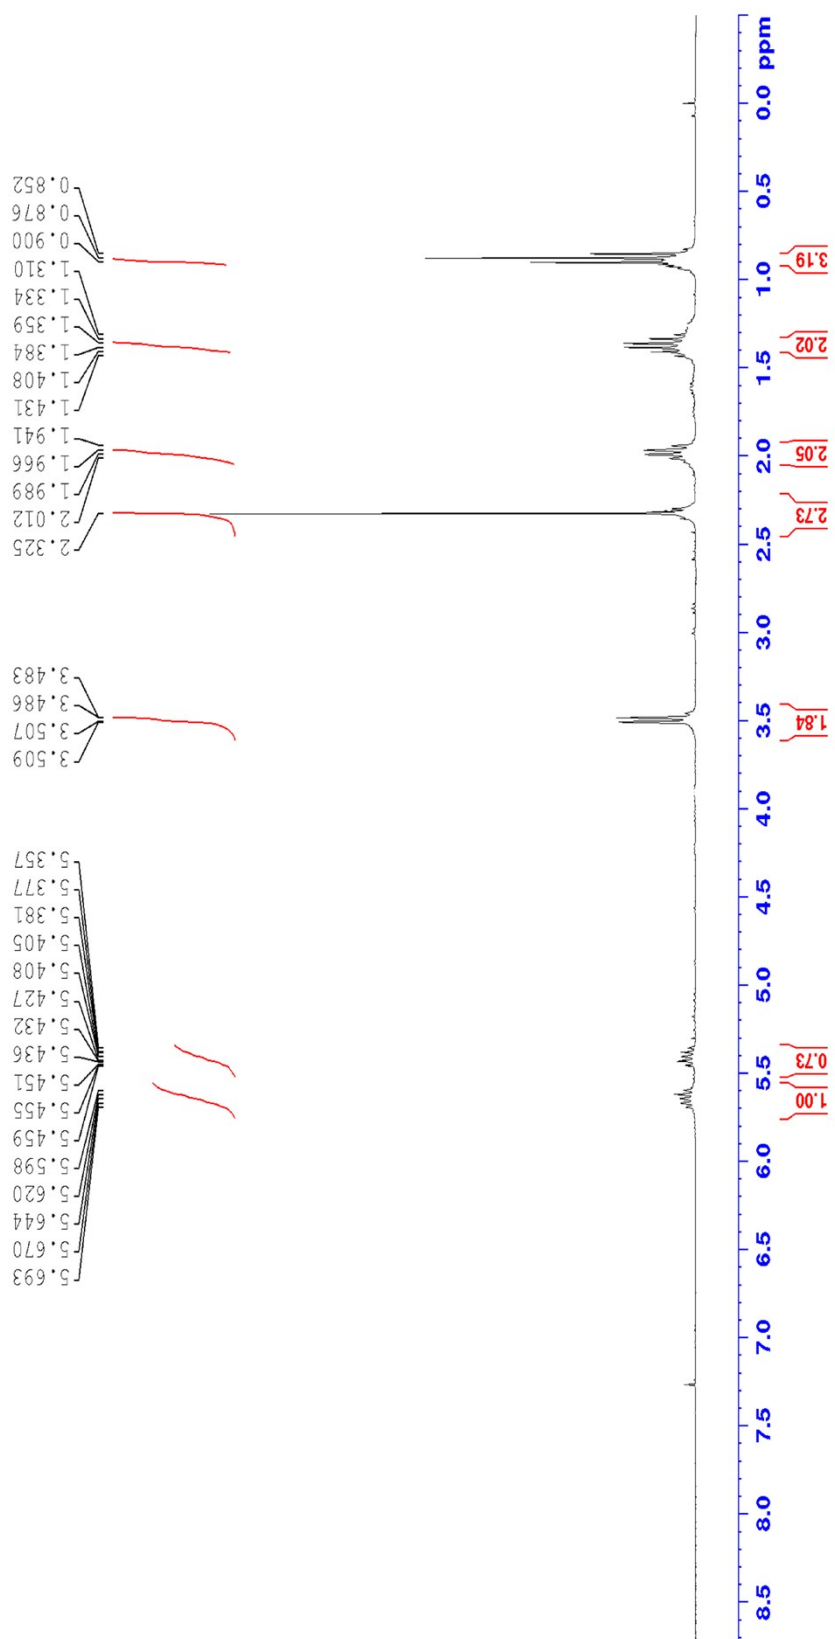

Triplet

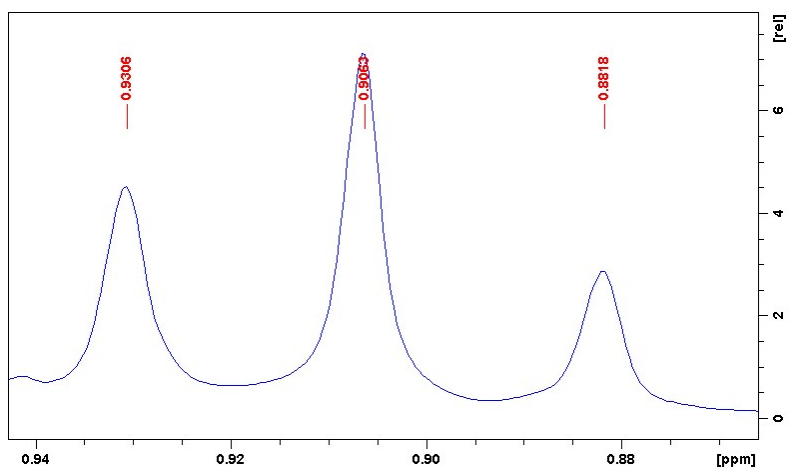

Sextet

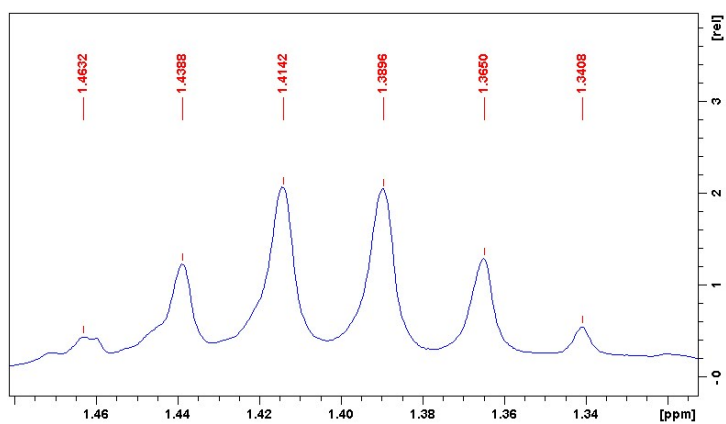

Doublet of triplets

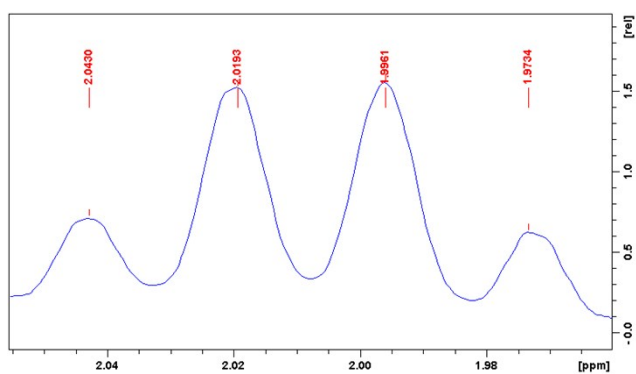

Doublet

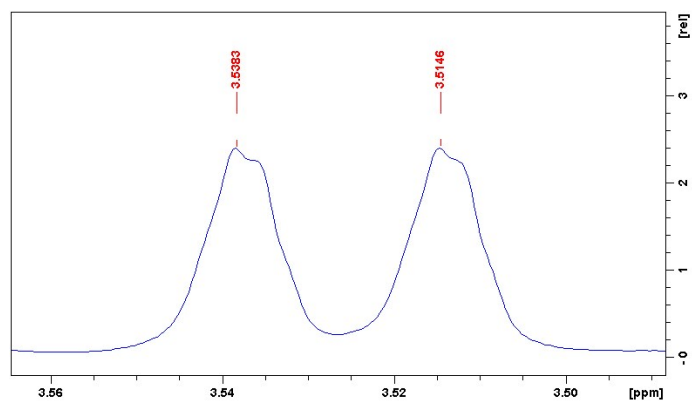

<sup>13</sup>C-NMR

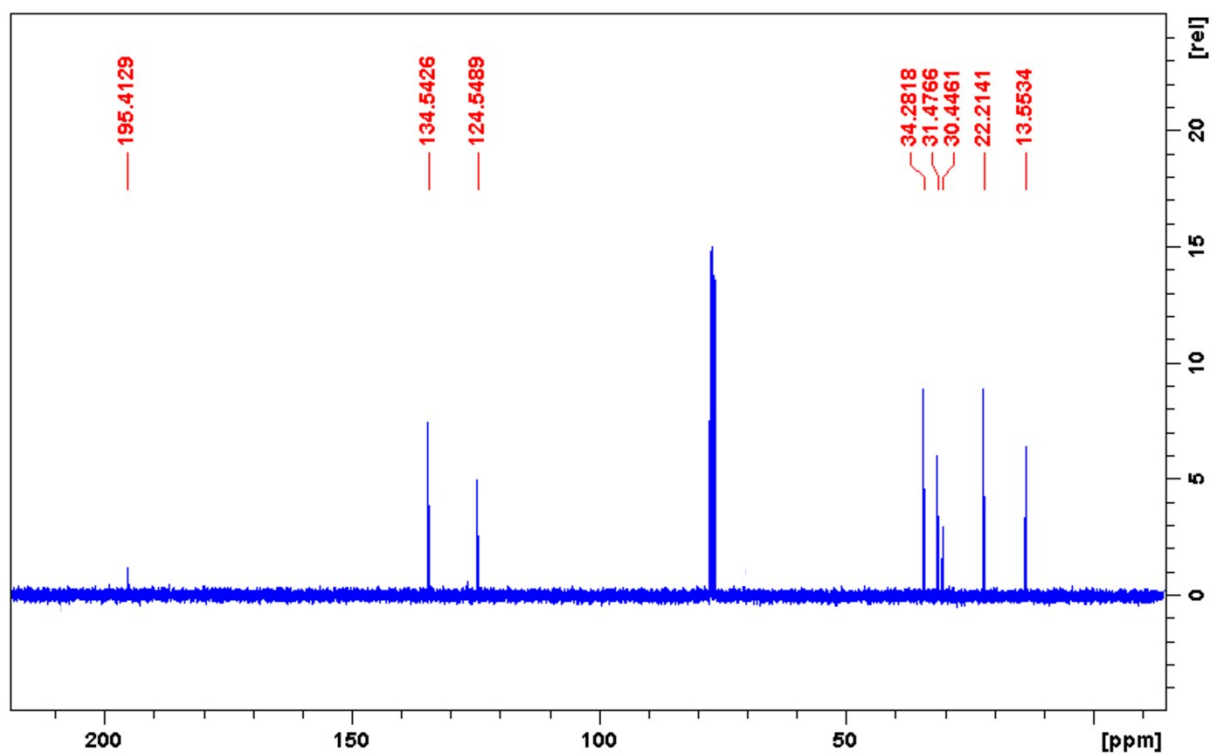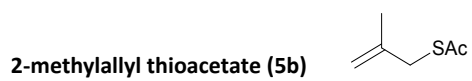

<sup>1</sup>H-NMR

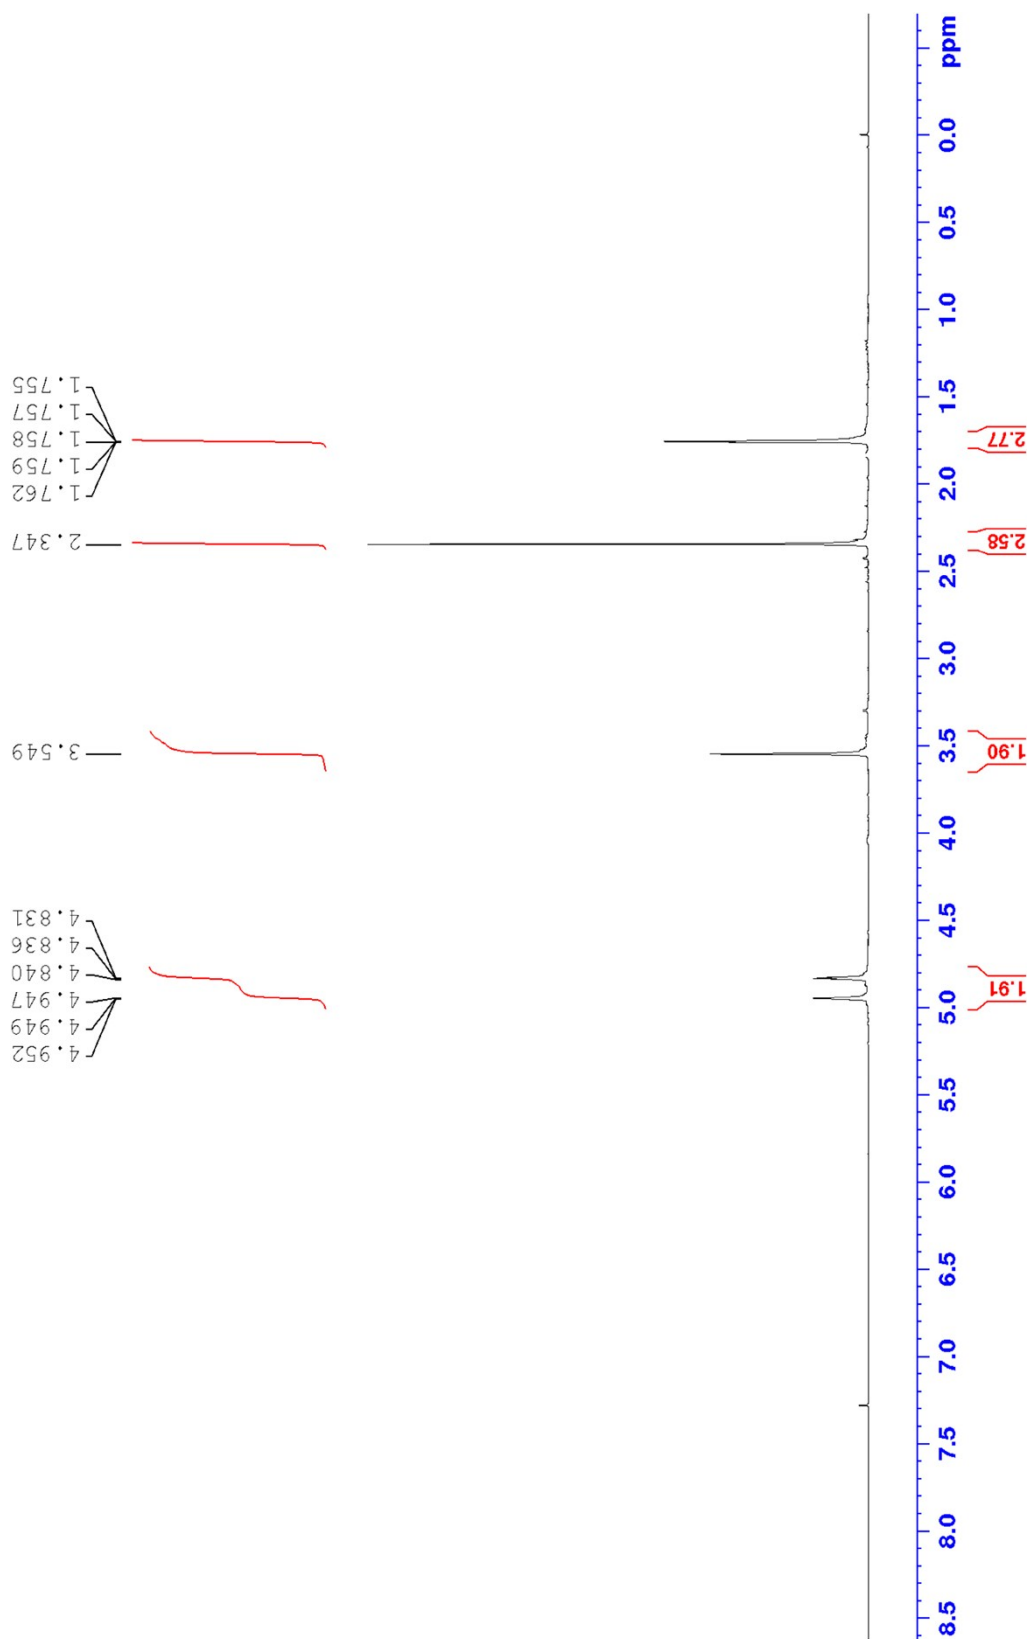

Doublet of triplets

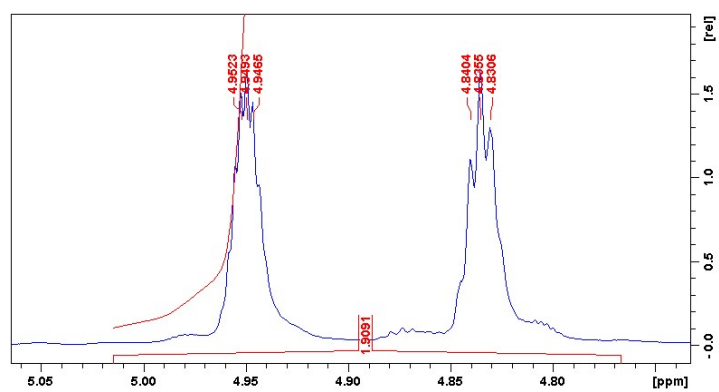

<sup>13</sup>C-NMR

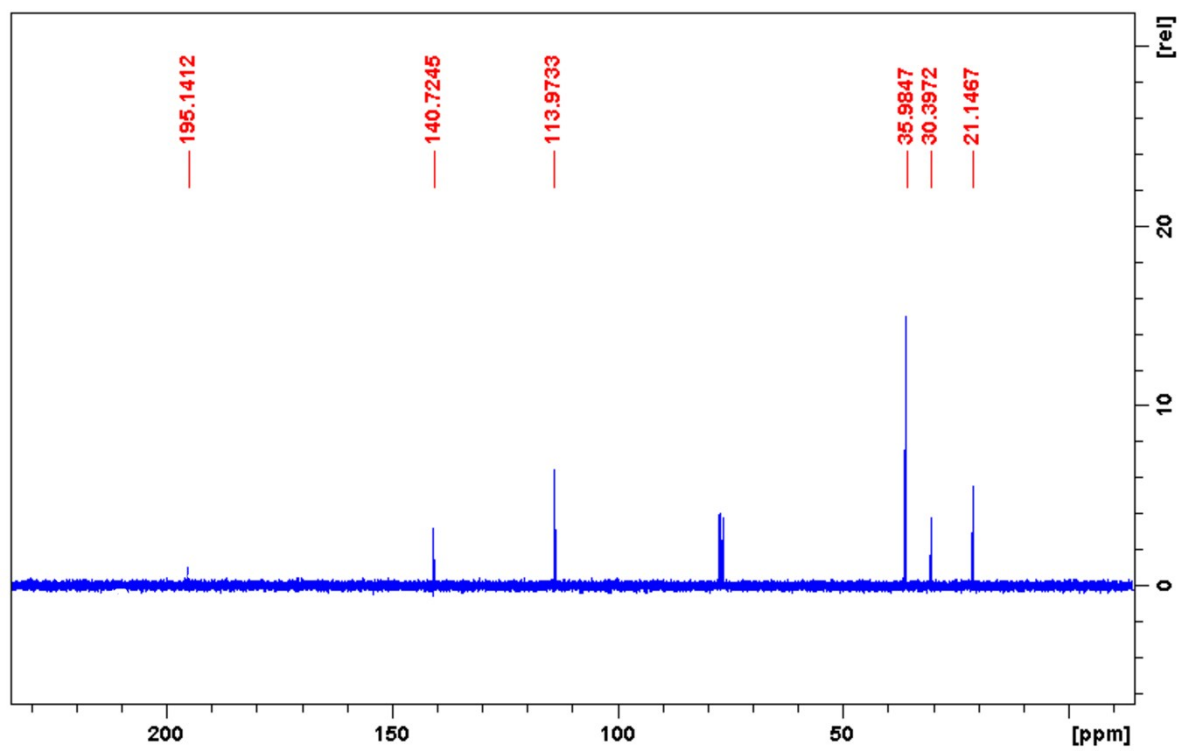

S-Prop-2-ynyl-thioacetate (6b)

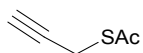

<sup>1</sup>H-NMR

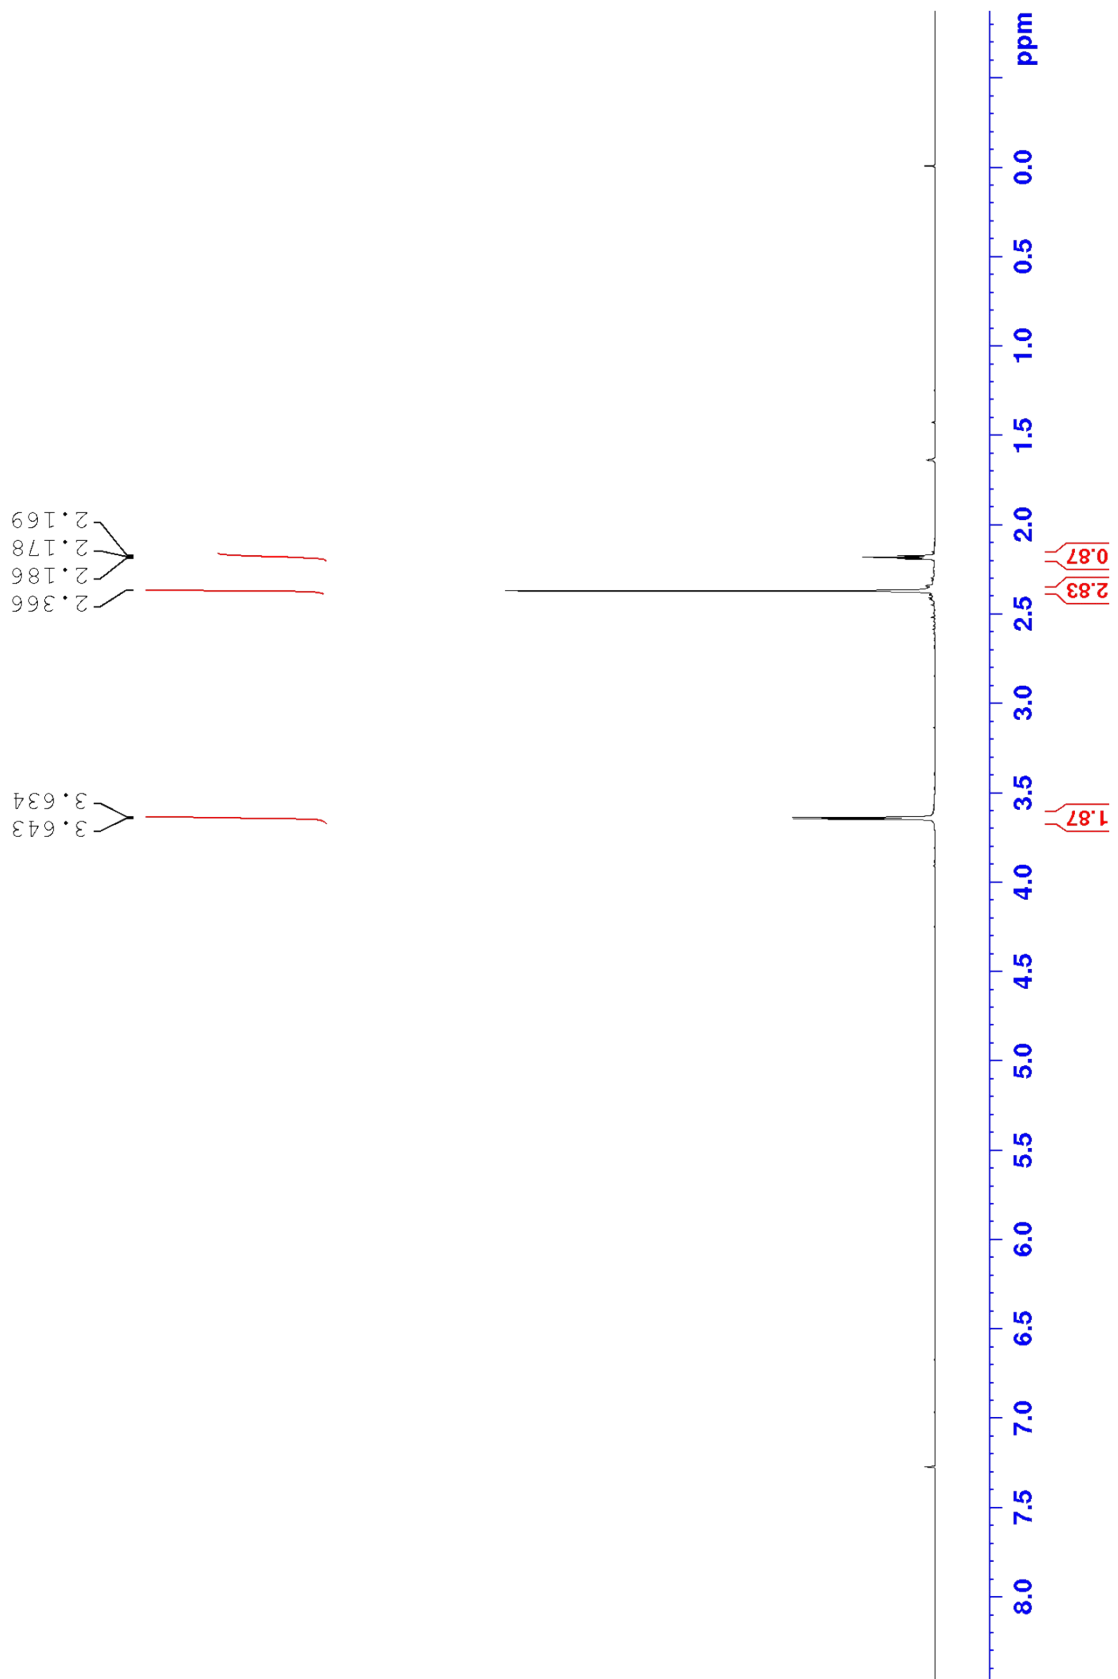

Triplet

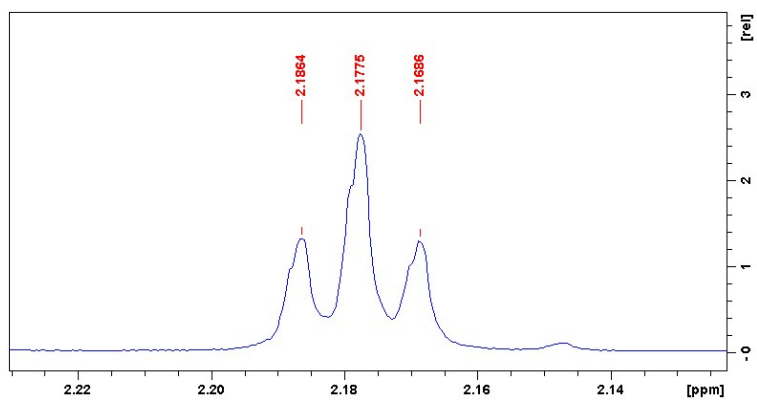

Doublet

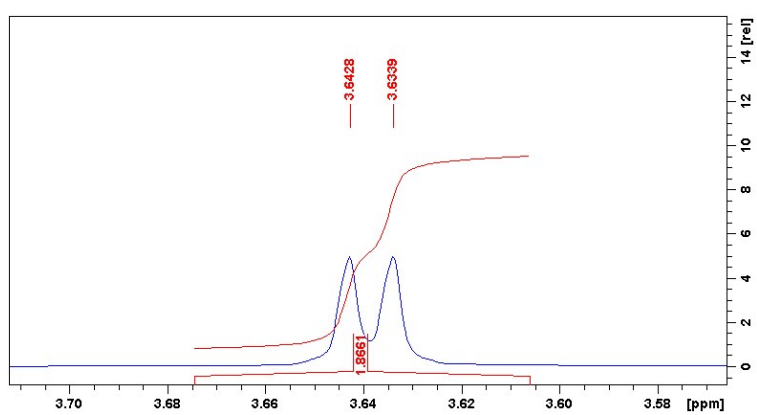

<sup>13</sup>C-NMR

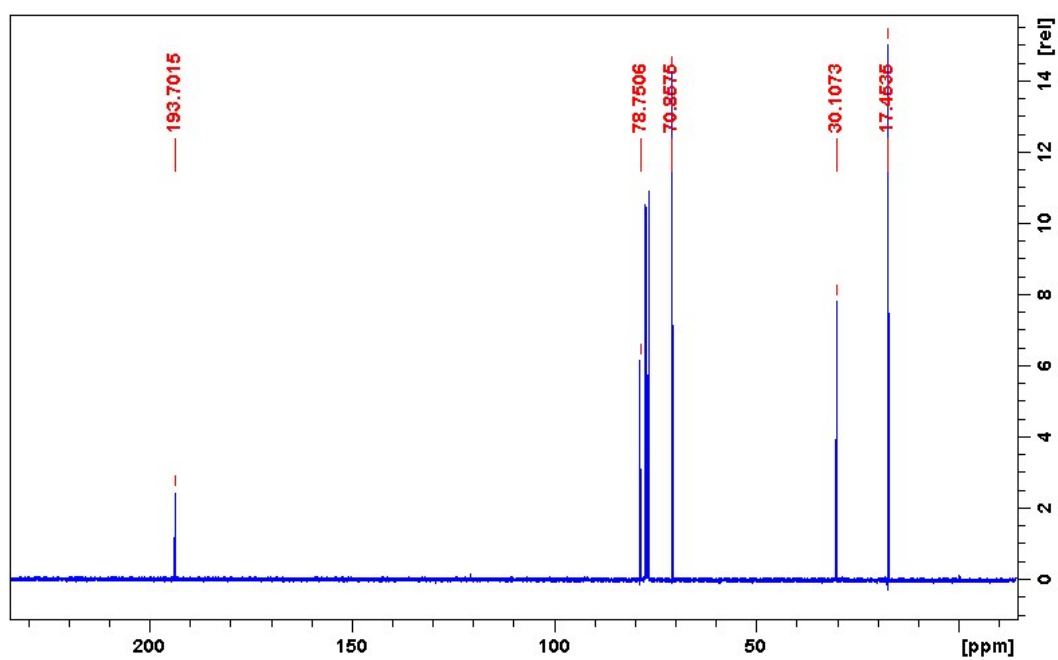

5-Acetylsulfanyl-hex-1-ene (1d)

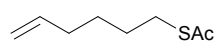



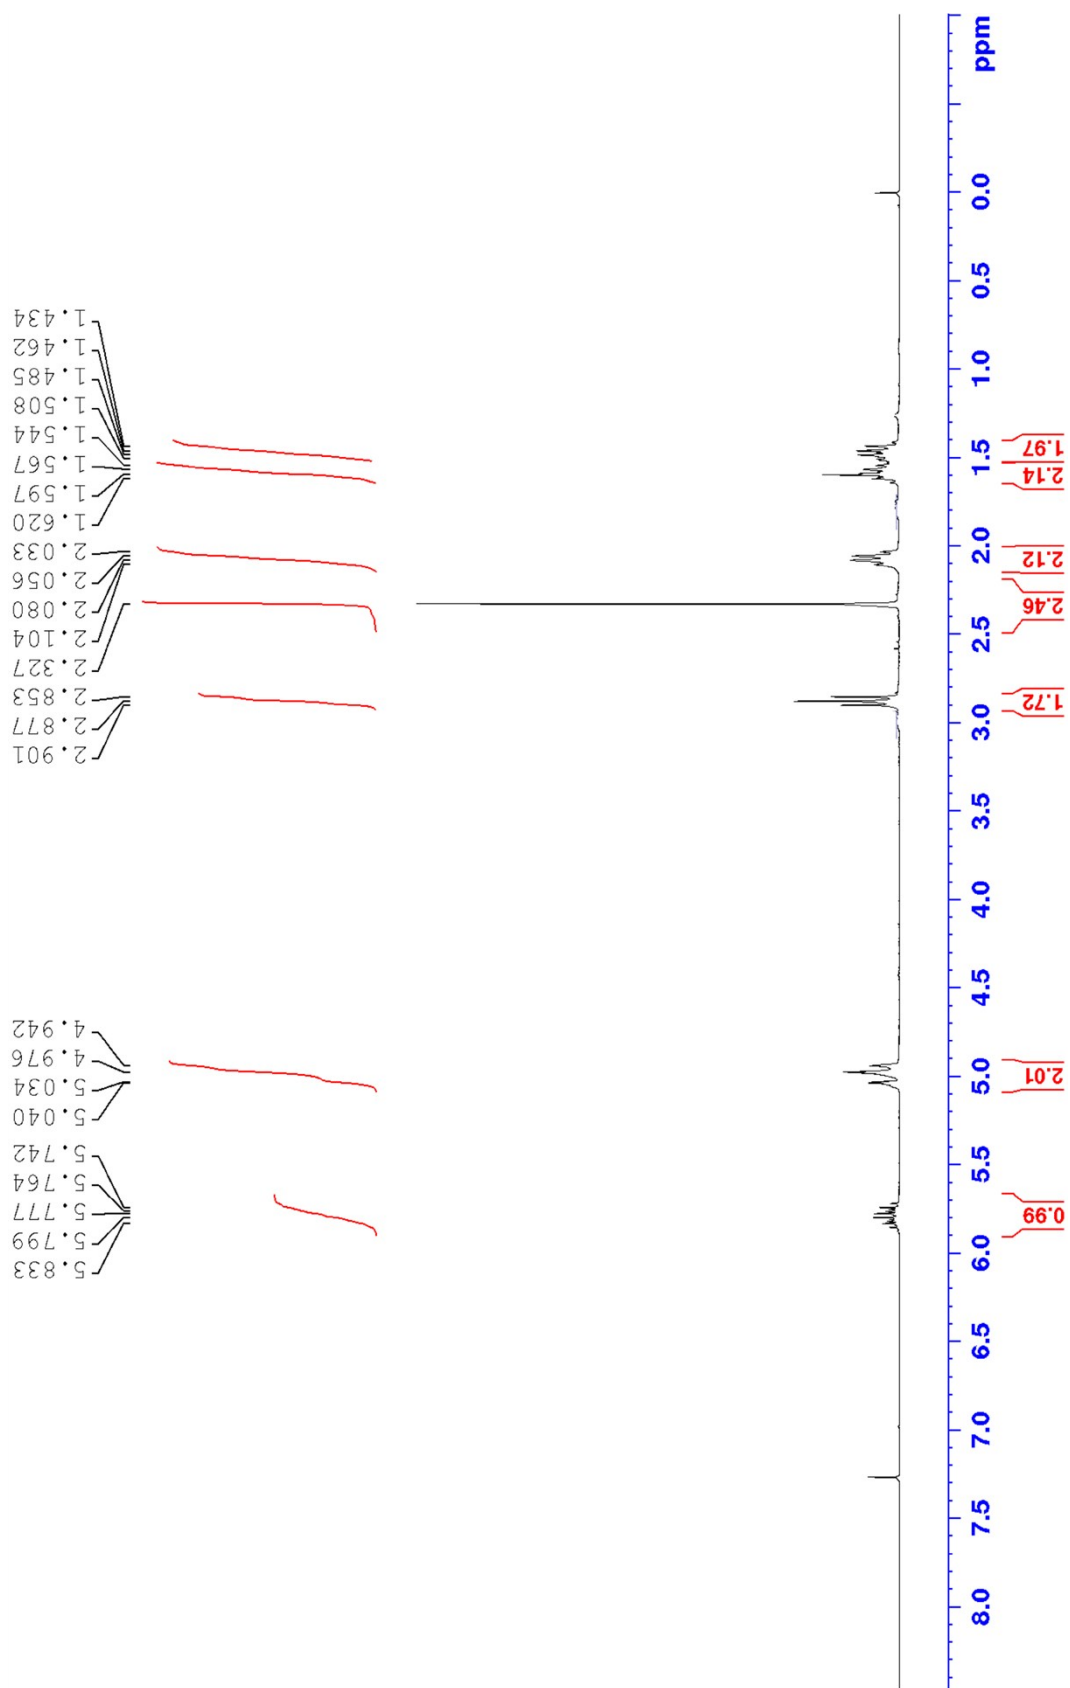

Triplet

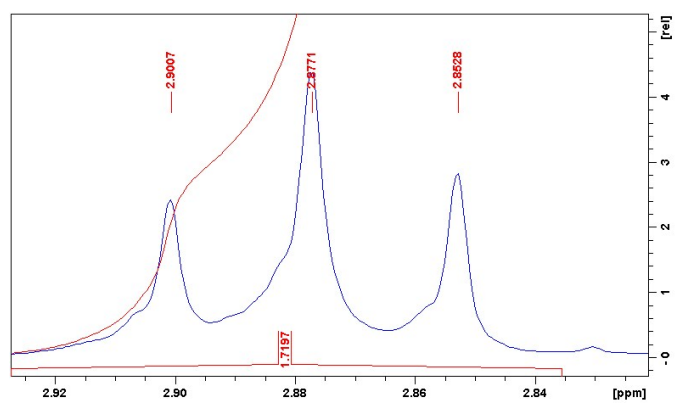

<sup>13</sup>C-NMR

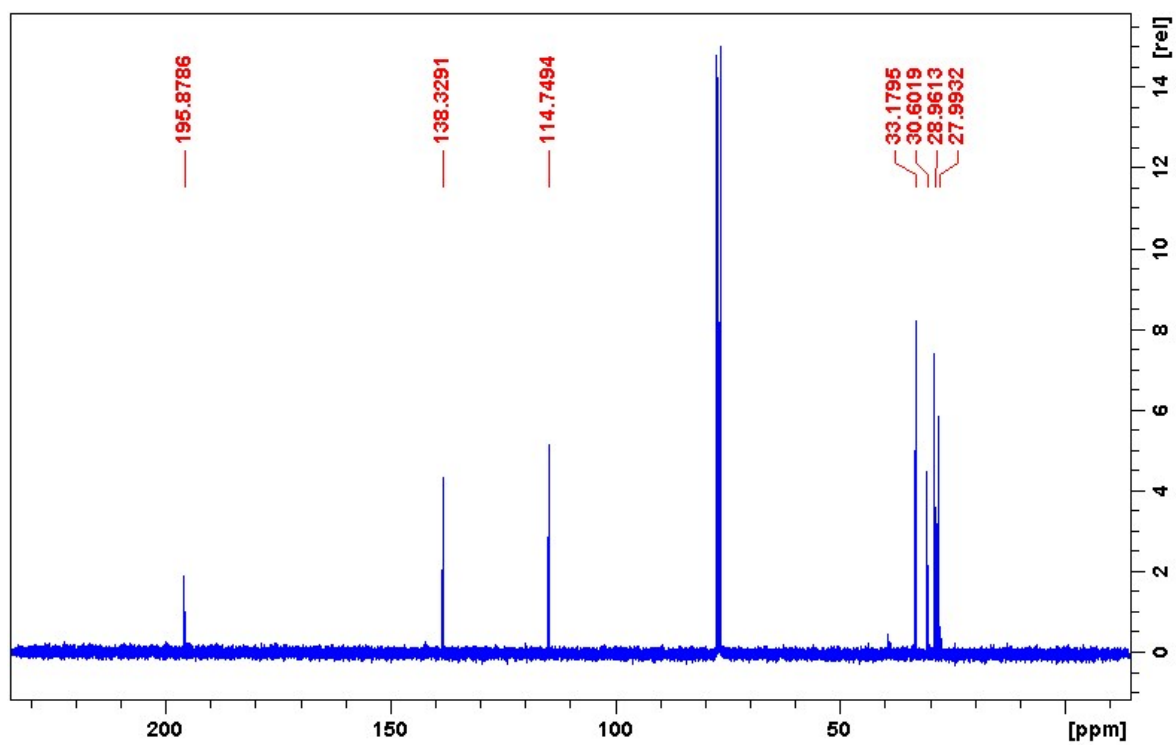

S-Pent-4-en-1-yl ethanethioate (2d)

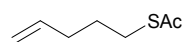

<sup>1</sup>H-NMR

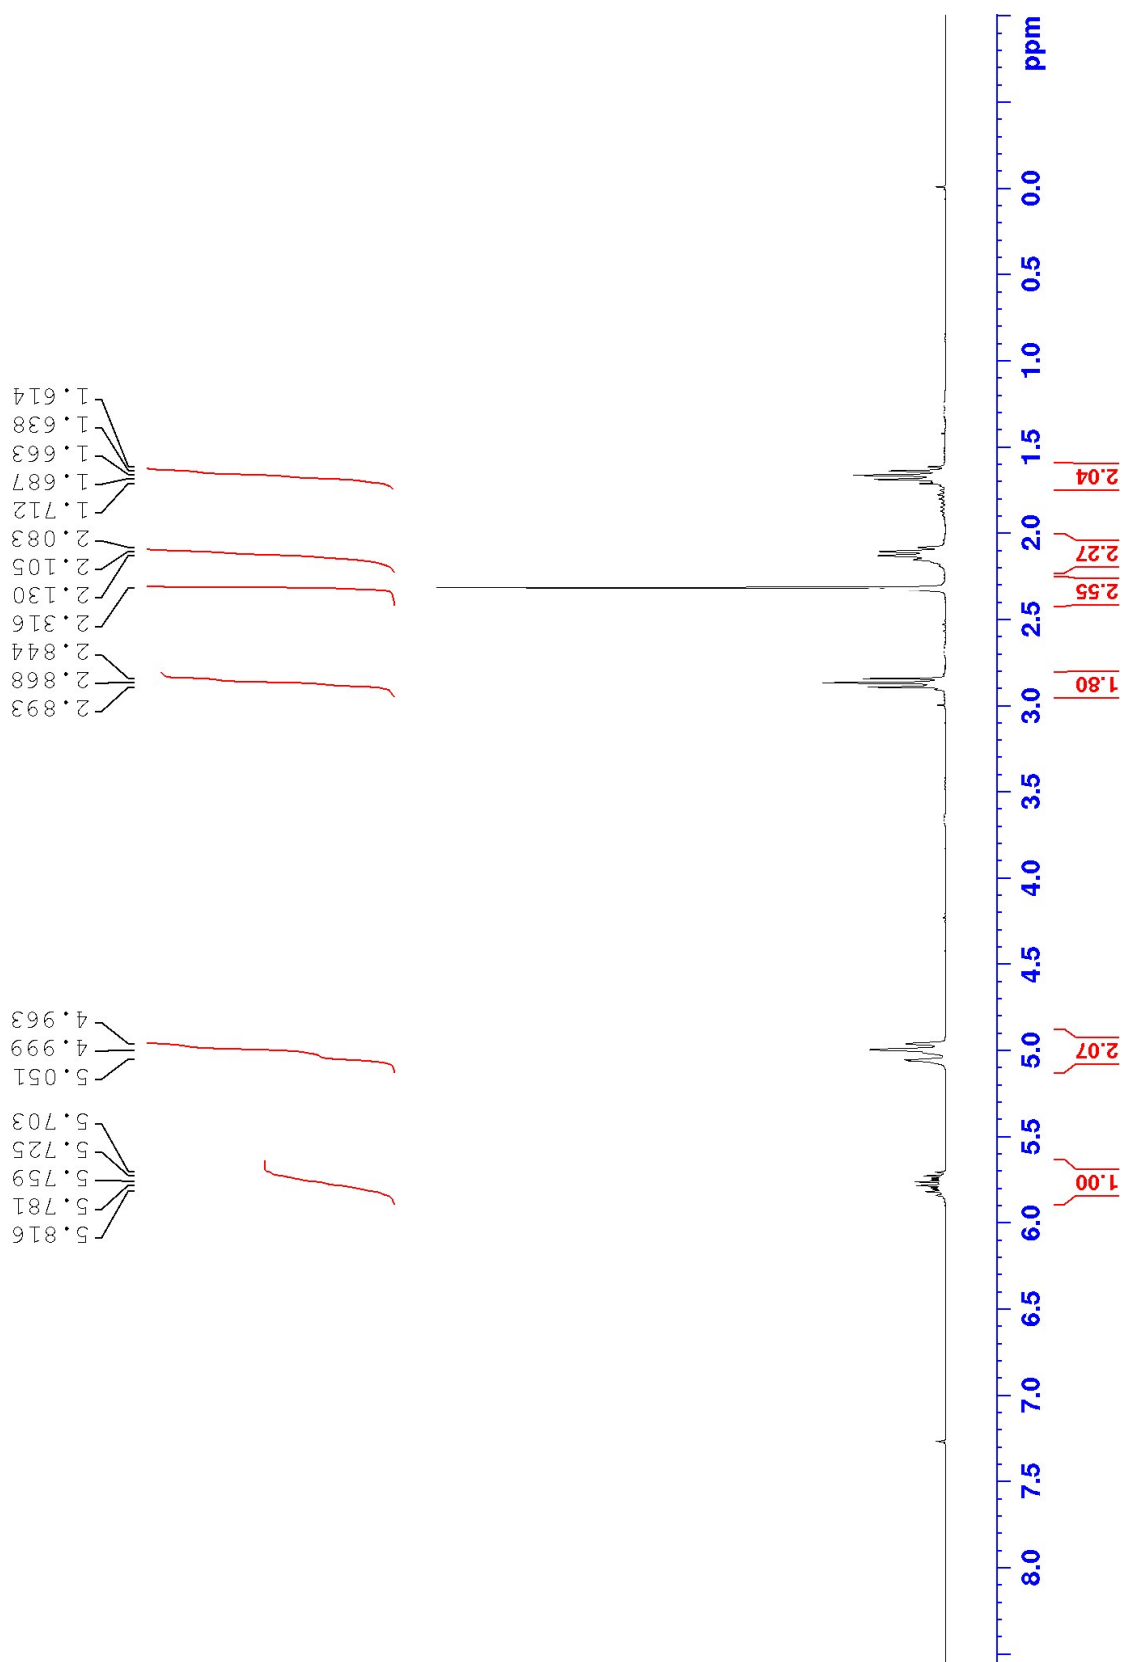

Quintet

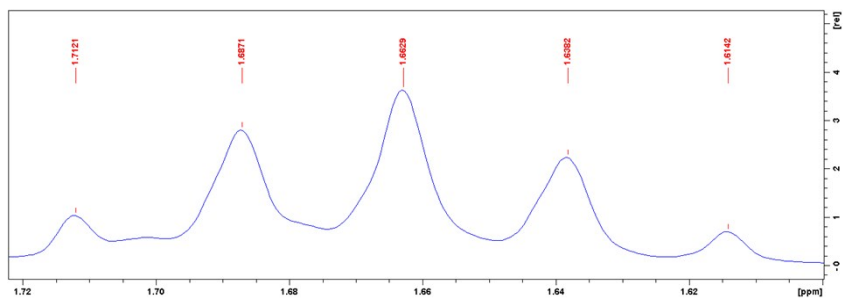

Triplet

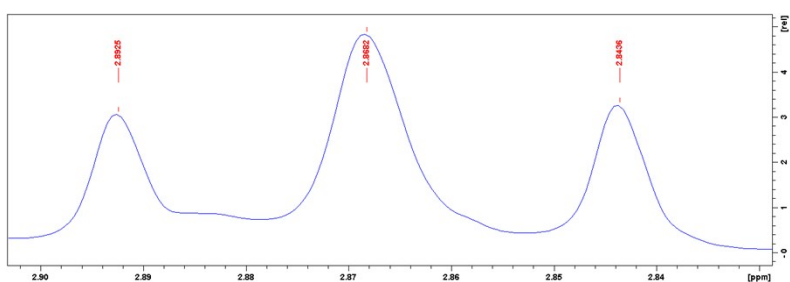

<sup>13</sup>C-NMR

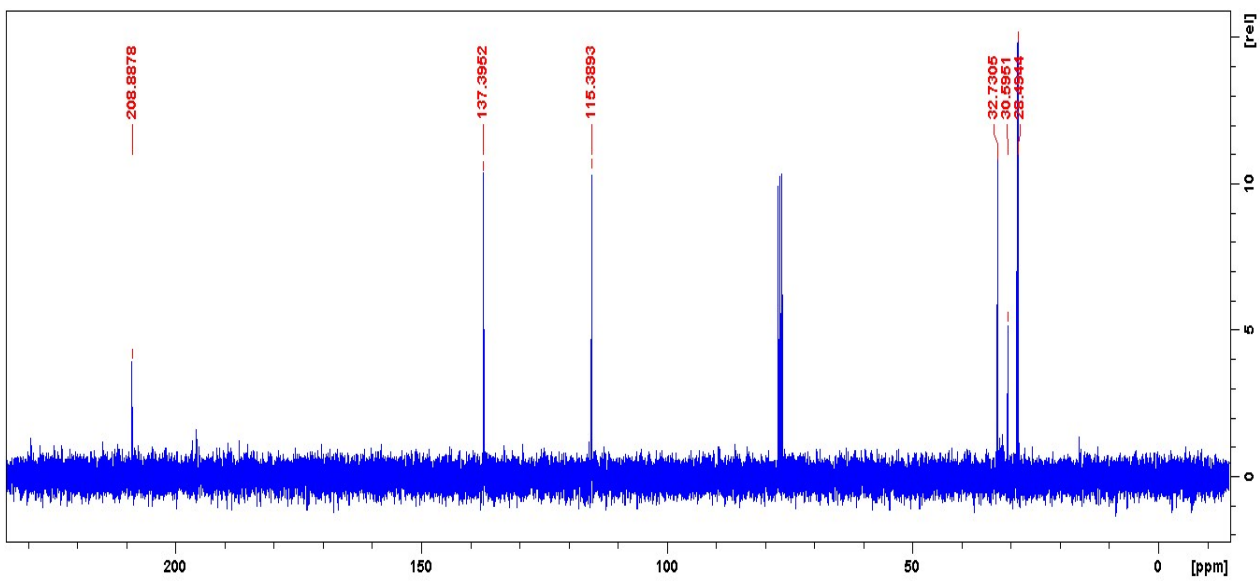

Thioacetic acid S-but-3-enyl ester (3d) 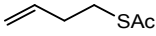

<sup>1</sup>H-NMR

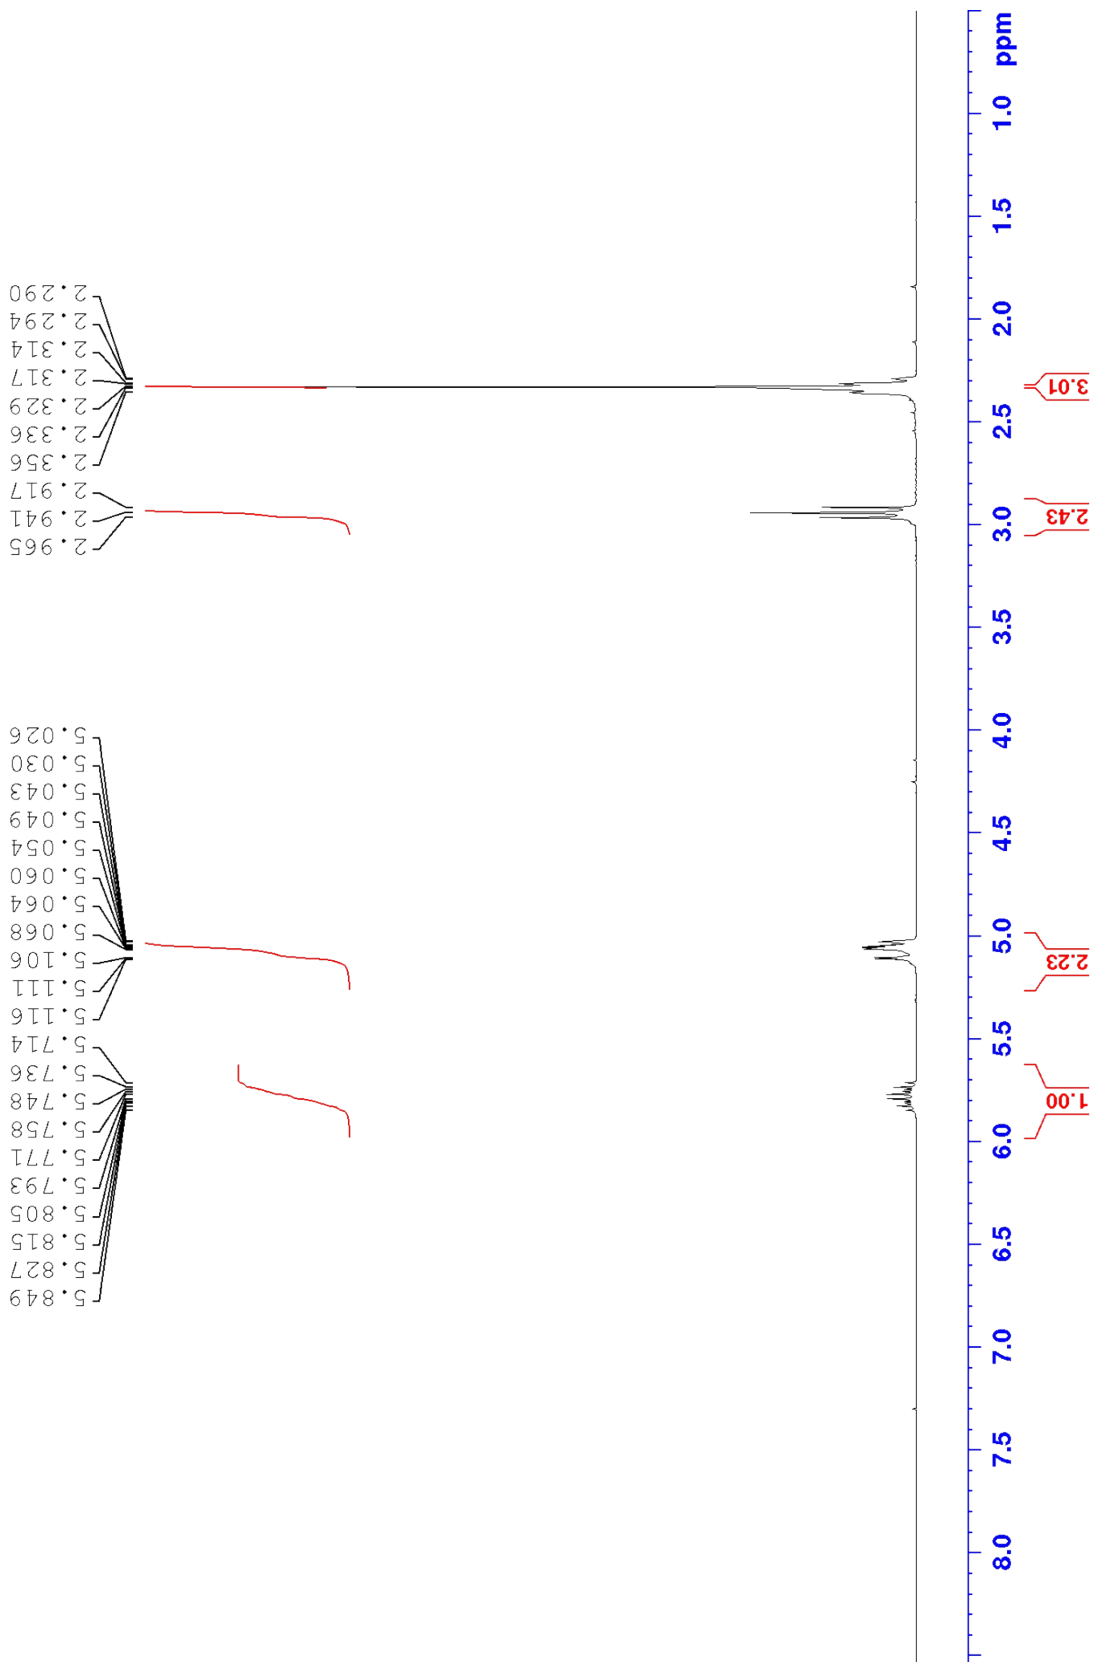

Triplet

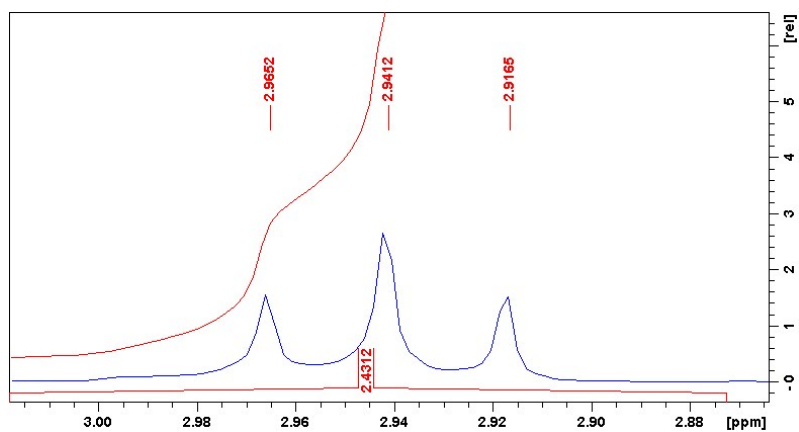

<sup>13</sup>C-NMR

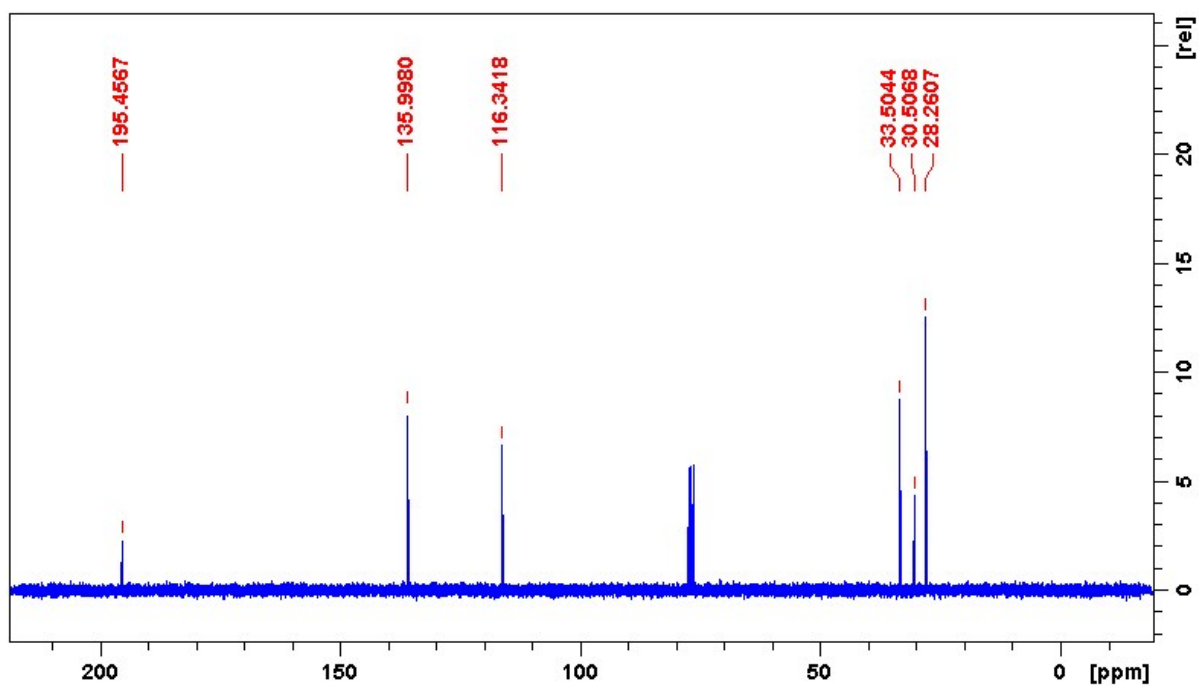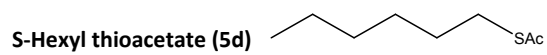

<sup>1</sup>H-NMR

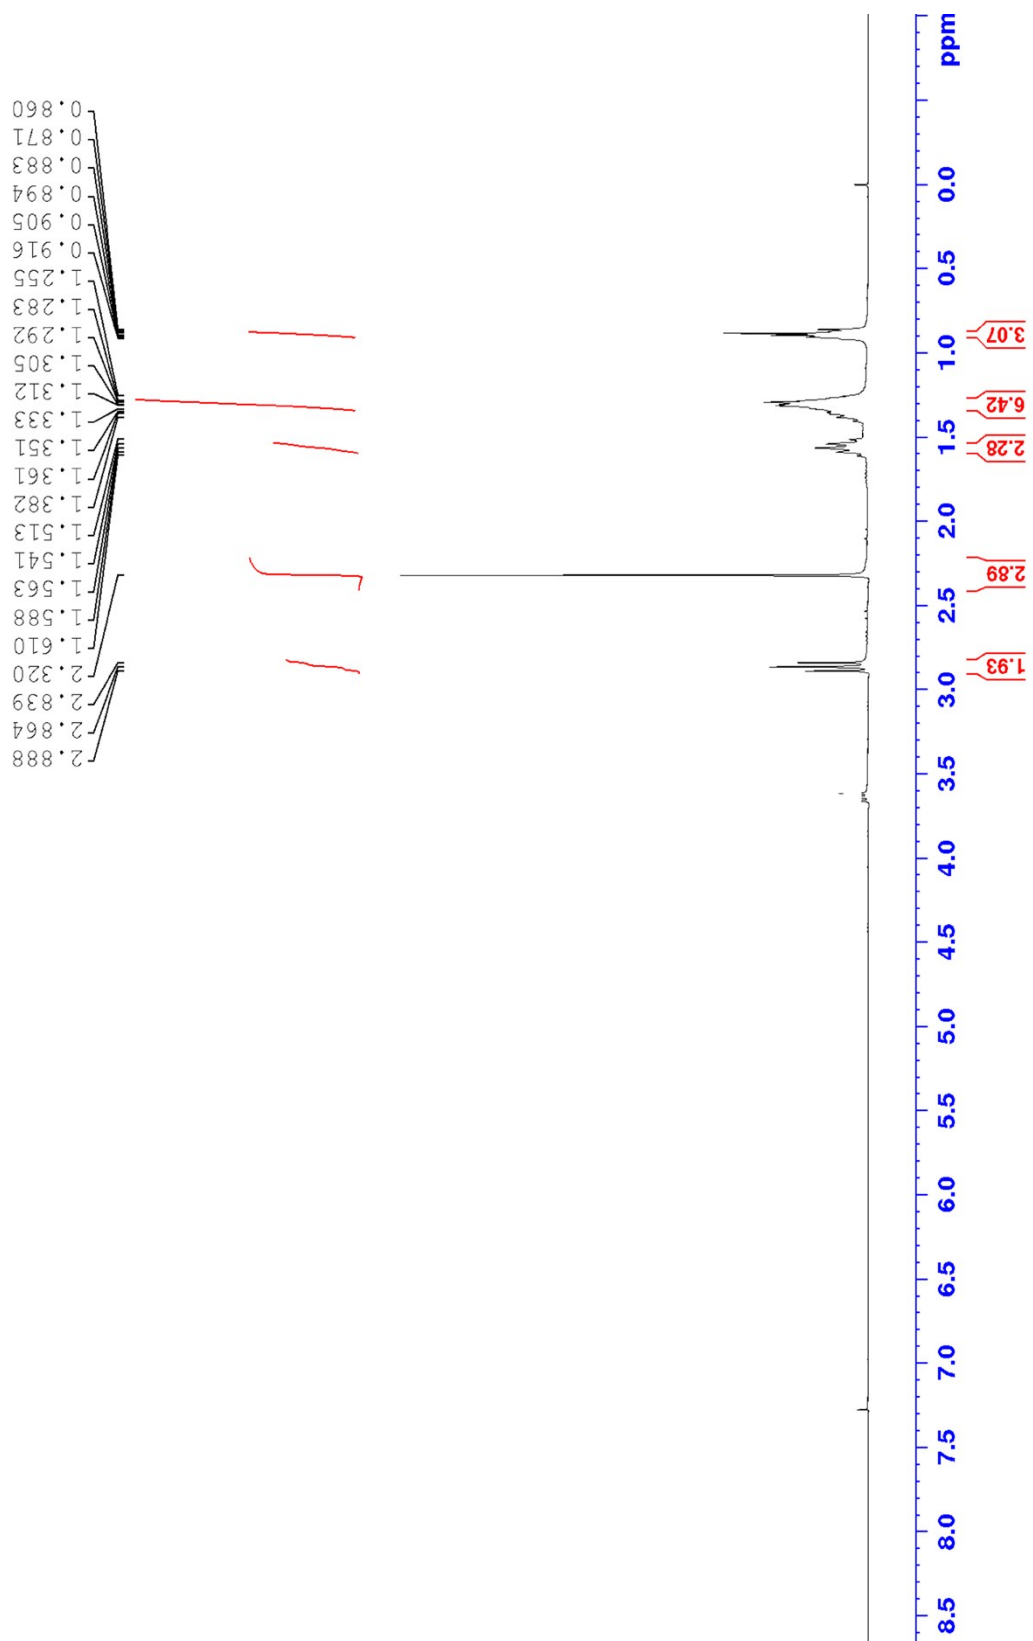

Quintet



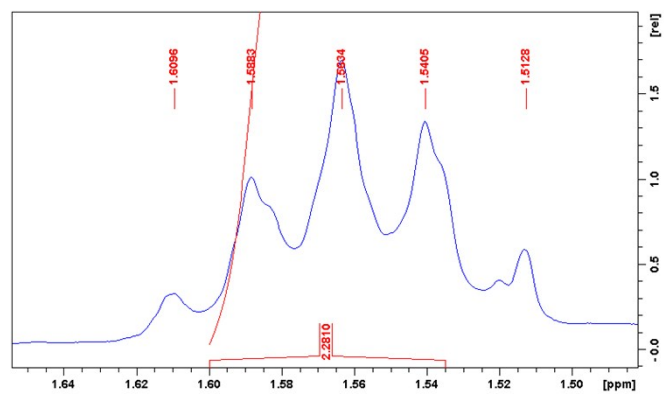

**<sup>13</sup>C-NMR**

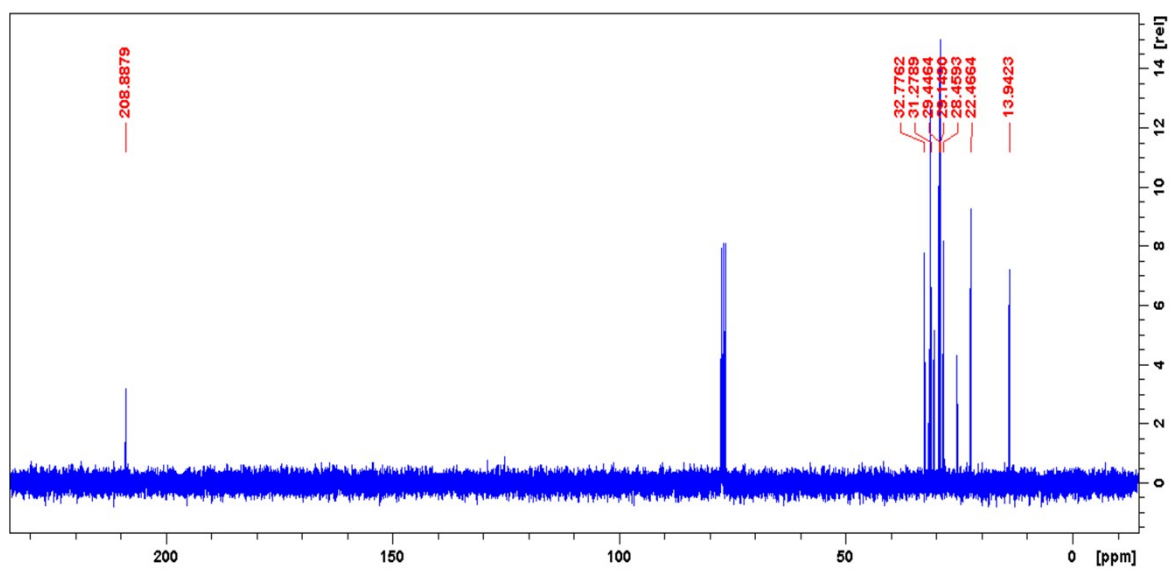

S-Butyl thioacetate (6d) CCCCS(=O)C

<sup>1</sup>H-NMR

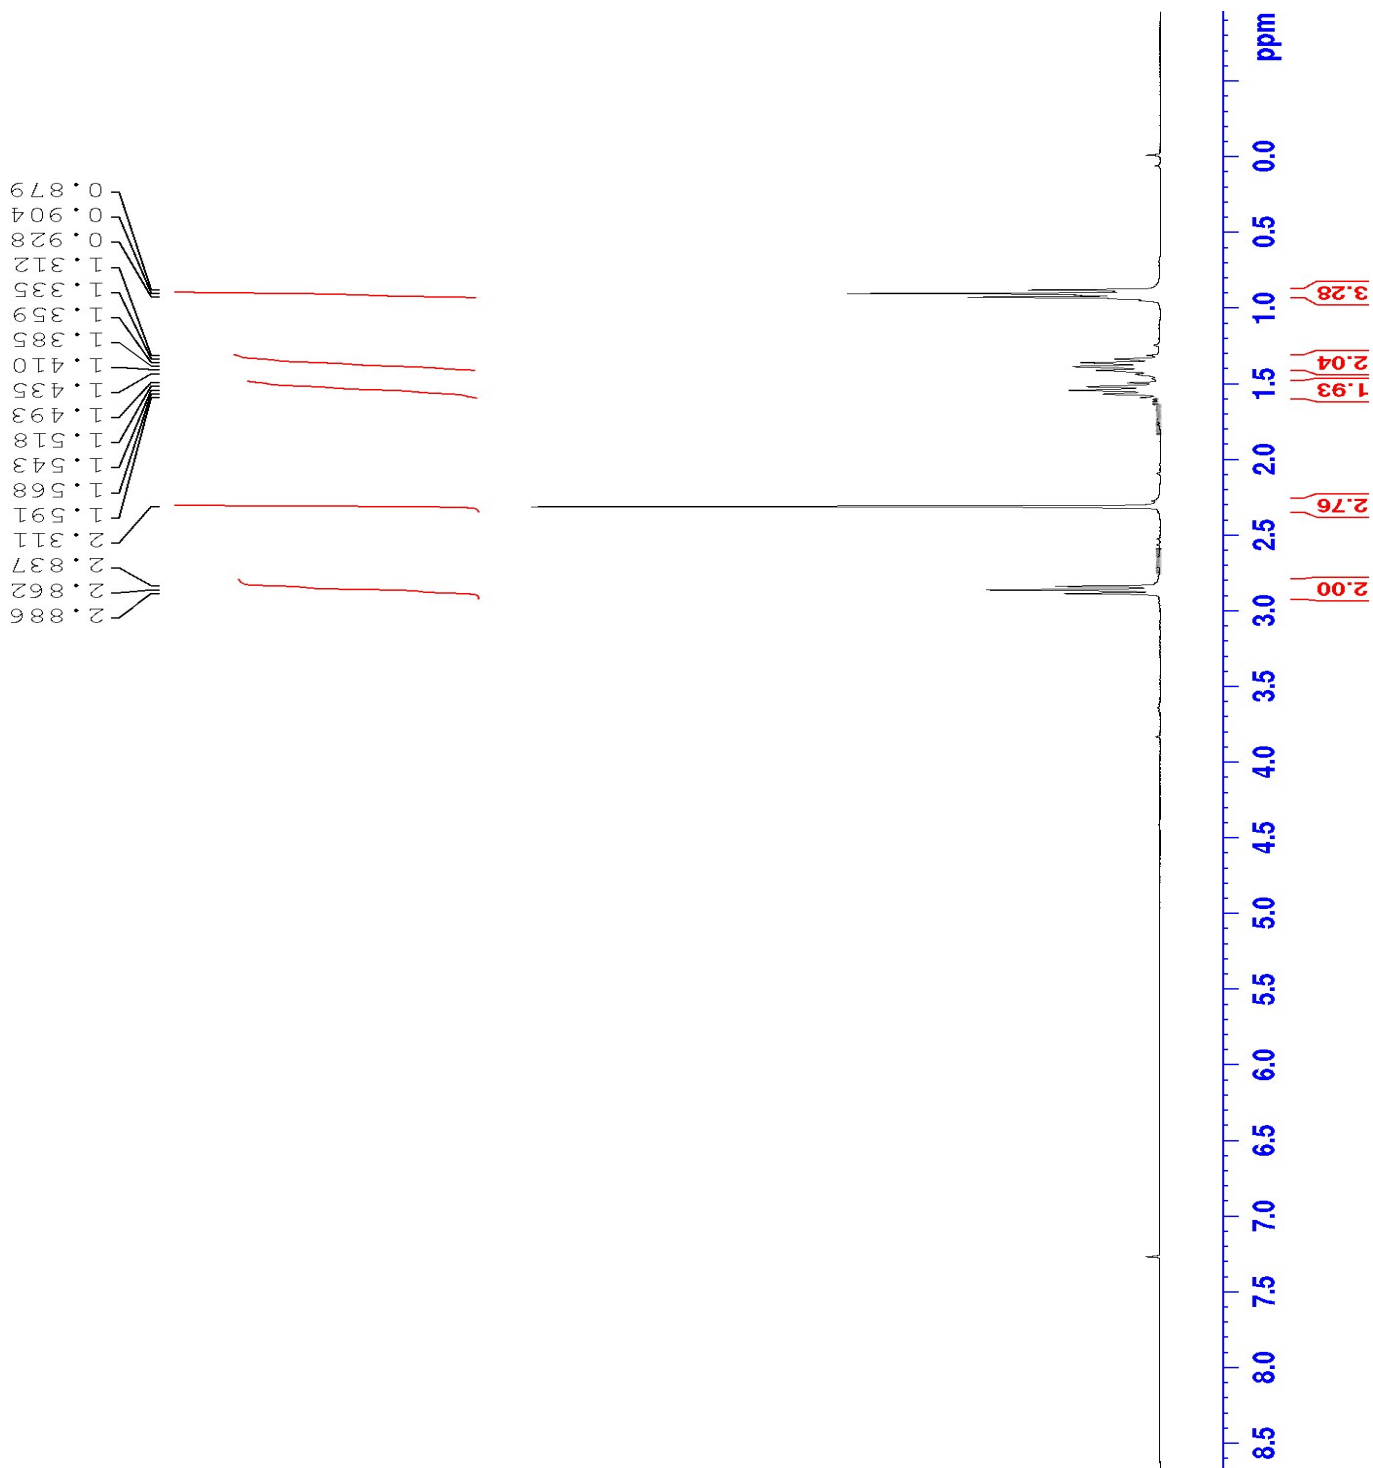

Triplet

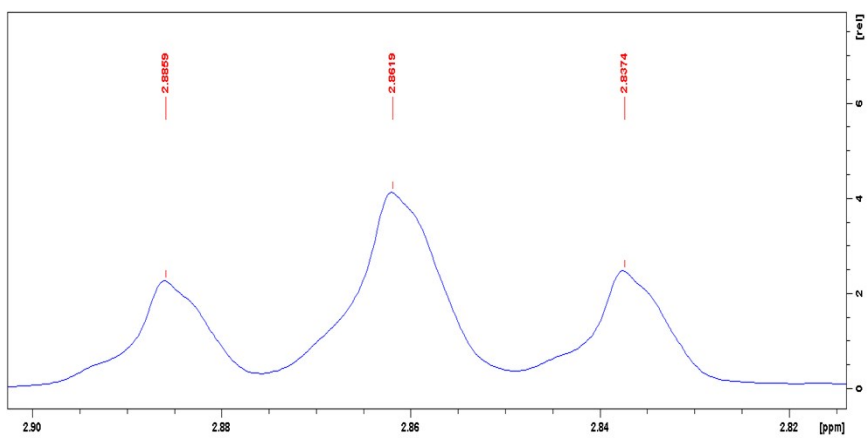

Quintet

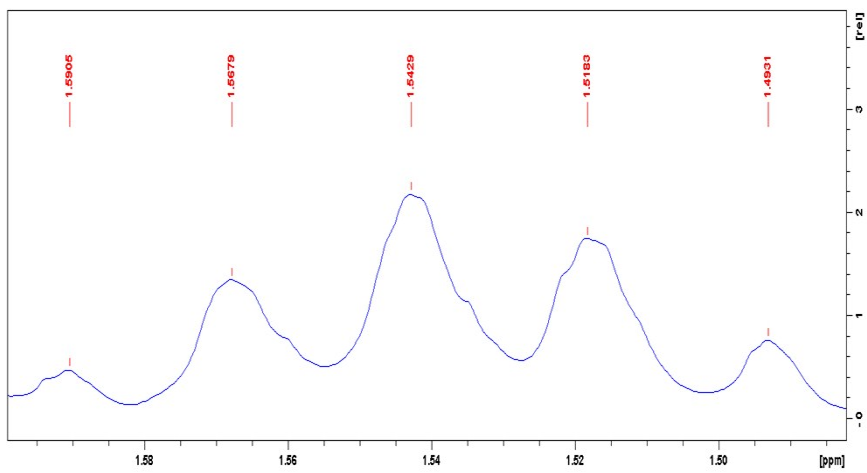

Sextet

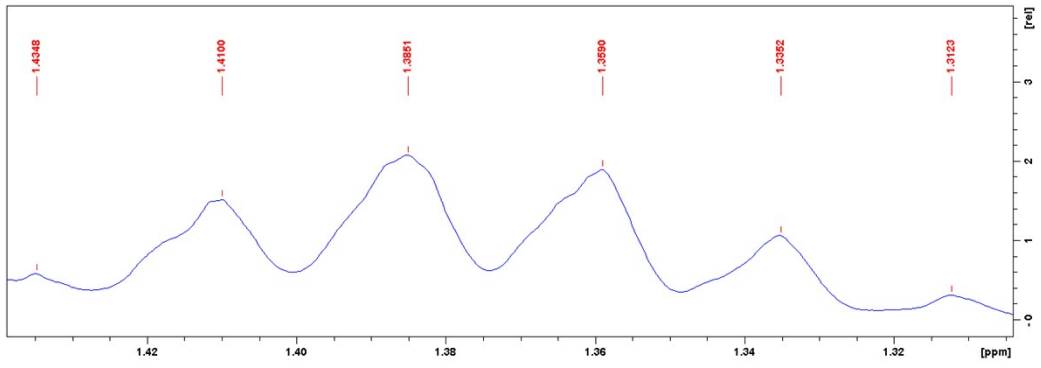

Triplet

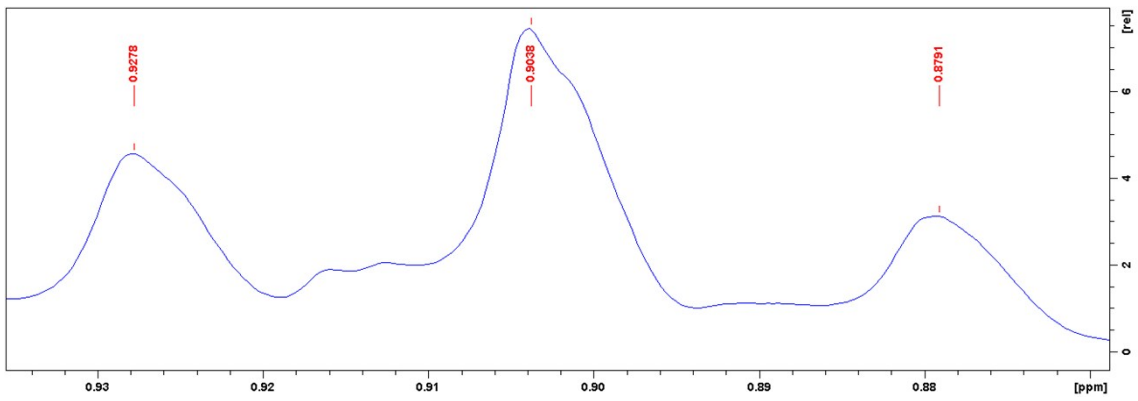

<sup>13</sup>C-NMR

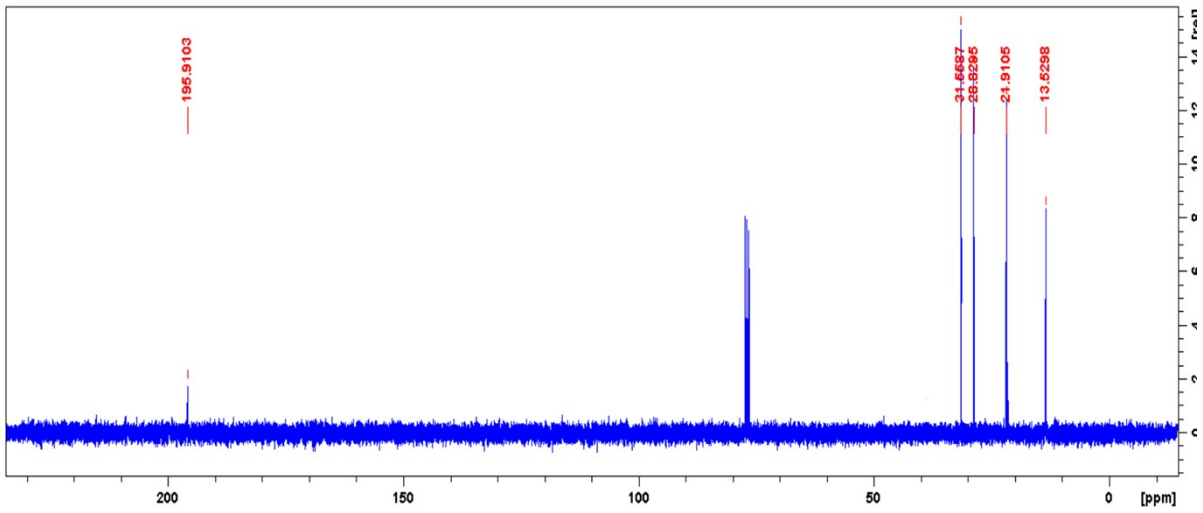

## 8. Notes and references

- 1 J. G. Smith, S. E. Drozda, S. P. Petraglia, N. R. Quinn, E. M. Rice, B. S. Taylor, M. Viswanathan, *J. Org. Chem.*, 1984, **49**, 4112-4120.
- 2 A. N. Kasatkina, N. Kulakova, G. A. Tolstikov, S. I. Lomakina, Bulletin of the Academy of Sciences of the USSR, Division of chemical science, 1988, **37**, 1939–1945.
- 3 P. Migowski, G. Machado, S. R. Teixeira, M. C. M. Alves, J. Morais, A. Traverse, J. Dupont, *Phys. Chem. Chem. Phys.*, 2007, **9**, 4814-4821.
- 4 Y. Liu, Y. Xu, S. H. Jung, J. Chae, *Synlett*, 2012, **23**, 2692-2698.
- 5 G. Wu, S. Xu, Y. Deng, C. Wu, X. Zhao, W. Ji, Y. Zhang, J. Wang, *Tetrahedron*, 2016, **72**, 8022-8030.
- 6 W. E. Truce, L. W. Christensen, *J. Org. Chem.*, 1968, **33**, 2261-2266.
- 7 B. F. Bonini, M. Comes-Franchini, M. Fochi, G. Mazzanti, F. Peri, A. Ricci, *J. Chem. Soc., Perkin Trans.*, 1996, **1**, 2803-2809.
- 8 W. E. Truce, L. W. Christensen, *J. Org. Chem.*, 1968, **33**, 2261-2266.
- 9 W.R. Jackson, P. Perlmutter, A.J. Smallridge, *Aust. J. Chem.* 1988, **41**, 1201-1208.
- 10 R. W. Bates, S. Sridhar, *J. Org. Chem.* 2011, **76**, 5026-5035.
- 11 A. Yazici, S. G. Pyne, *Org. Lett.*, 2013, **15**, 5878-5881.
- 12 T. H. Jepsen, E. Glibstrup, F. Crestey, A. A. Jensen, J. L. Kristensen, *Beilstein J. Org. Chem.*, 2017, **13**, 988-994.
- 13 (a) S. Chatti, M. Bortolussi, A. Loupy, *Tetrahedron* 2001, **57**, 4365-4370. (b) H. H. Baer, R. L. Breton, *Carbohydr. Res.*, 1990, **209**, 181-189.
- 14 M. C. Özdemir, B. Özgün, *J. Mol. Liq.*, 2014, **200**, 129-135.
- 15 J. Wang, Y. Zhao, W. Zhao, P. Wang, J. Li, *J. Carbohydr. Chem.*, 2016, **35**, 445-454.
- 16 J. W. W. Chang, E. Y. Chia, C. L. L. Chaia, J. Seayad, *Org. Biomol. Chem.*, 2012, **10**, 2289-2299.
- 17 C. Yang, Q. Jin, H. Zhang, J. Liao, J. Zhu, B. Yub, J. Deng, *Green Chem.*, 2009, **11**, 1401-1405.
- 18 N. Sakai, S. Horikawa, Y. Ogiwara, *Synthesis*, 2018, **50**, 565–574.
- 19 H. A. Held, A. Roychowdhury, S. A. Benner, *Nucleos Nucleot Nucl.*, 2003, **22**, 391–404.
- 20 A. Brenner, R. L. Burwell, *J. Am. Chem. Soc.*, 1975, **97**:9, 2566-2567.
- 21 J. Chang, E. Chia, C. Chaia, J. Seayad, *Org. Biomol. Chem.*, 2012, **10**, 2289-2299.
- 22 K. Kuciński, G. Hreczycho, *Org. Process Res. Dev.*, 2018, **22**, 489–493.
- 23 B. Kaboudin, Y. Abedi, *Synthesis* 2009, **12**, 2025-2028.
- 24 J. T. Ayers, S. R. Anderson, *synth, comm*, 1999, **29**, 351-358.
- 25 N. Sakai, S. Horikawa, Y. Ogiwara, *Synthesis*, 2018, **50**, 565-574.
